# Supplementary material
Source: publisher site journal article supplement (https://www.spandidos-publications.com/4848/downloadSupplementary)
Supplement: Supplementary file 1 [file downloadSupplementary]

## Sheet: Annotation_Combine
Table SII. MAPK pathway-related protein annotation of DPSC-Exos.
Protein accession	Protein description	Gene name	MW [kDa]	Coverage [%]	DPSCEXO/DPSC Ratio	DPSCEXO/DPSC P value	Subcellular localization	Biological Process	Cellular Component	Molecular Function	KEGG KO No.	KEGG Gene	KEGG pathway	IPR ID	Domain description	KOG category	KOG NO.	KOG description
P02656	Apolipoprotein C-III OS=Homo sapiens OX=9606 GN=APOC3 PE=1 SV=1	APOC3	10.852	16.2	17.818	9.3631e-07	extracellular	GO:0060627 regulation of vesicle-mediated transport; GO:0044700 single organism signaling; GO:0044085 cellular component biogenesis; GO:0065008 regulation of biological quality; GO:0032371 regulation of sterol transport; GO:0034379 very-low-density lipoprotein particle assembly; GO:0044255 cellular lipid metabolic process; GO:0070328 triglyceride homeostasis; GO:0019216 regulation of lipid metabo…	GO:0005615 extracellular space; GO:0044421 extracellular region part; GO:0031410 cytoplasmic vesicle; GO:0005737 cytoplasm; GO:0031982 vesicle; GO:0034358 plasma lipoprotein particle; GO:0034385 triglyceride-rich plasma lipoprotein particle; GO:0032991 macromolecular complex; GO:0044424 intracellular part; GO:0005623 cell; GO:0034361 very-low-density lipoprotein particle; GO:0005769 early endosom…	GO:0015485 cholesterol binding; GO:0032934 sterol binding; GO:0055102 lipase inhibitor activity; GO:0070653 high-density lipoprotein particle receptor binding; GO:0005102 receptor binding; GO:0043167 ion binding; GO:0005515 protein binding; GO:0098772 molecular function regulator; GO:0004857 enzyme inhibitor activity; GO:0005496 steroid binding; GO:0097159 organic cyclic compound binding; GO:0070…	K08759	APOC3; apolipoprotein C-III	hsa03320 PPAR signaling pathway - Homo sapiens (human); hsa04979 Cholesterol metabolism - Homo sapiens (human);
Q8NC54	Keratinocyte-associated transmembrane protein 2 OS=Homo sapiens OX=9606 GN=KCT2 PE=1 SV=2	KCT2	29.234	4.9	0.625	0.47764	plasma membrane		GO:0031224 intrinsic component of membrane; GO:0016020 membrane; GO:0016021 integral component of membrane; GO:0044425 membrane part;
Q5ZPR3	CD276 antigen OS=Homo sapiens OX=9606 GN=CD276 PE=1 SV=1	CD276	57.235	3.2	1.18	0.04488	extracellular	GO:0050863 regulation of T cell activation; GO:0002694 regulation of leukocyte activation; GO:0032944 regulation of mononuclear cell proliferation; GO:0045321 leukocyte activation; GO:0042108 positive regulation of cytokine biosynthetic process; GO:0009891 positive regulation of biosynthetic process; GO:0044699 single-organism process; GO:0051249 regulation of lymphocyte activation; GO:0042110 T …	GO:0016020 membrane; GO:0044421 extracellular region part; GO:0009897 external side of plasma membrane; GO:0071944 cell periphery; GO:0031982 vesicle; GO:0031224 intrinsic component of membrane; GO:0005623 cell; GO:0016021 integral component of membrane; GO:0005576 extracellular region; GO:0005886 plasma membrane; GO:0043226 organelle; GO:0070062 extracellular exosome; GO:0044459 plasma membrane …	GO:0005515 protein binding; GO:0005102 receptor binding; GO:0005488 binding;	K06746	B7H3, CD276; immune costimulatory protein B7-H3	hsa04514 Cell adhesion molecules (CAMs) - Homo sapiens (human);	IPR003598; IPR007110; IPR013783; IPR013106; IPR003599; IPR003597;	Immunoglobulin subtype 2; Immunoglobulin-like domain; Immunoglobulin-like fold; Immunoglobulin V-set domain; Immunoglobulin subtype; Immunoglobulin C1-set;
P55809	Succinyl-CoA:3-ketoacid coenzyme A transferase 1, mitochondrial OS=Homo sapiens OX=9606 GN=OXCT1 PE=1 SV=1	OXCT1	56.157	27.3	0.799	0.180797	mitochondria	GO:0065008 regulation of biological quality; GO:0042182 ketone catabolic process; GO:0007420 brain development; GO:0050796 regulation of insulin secretion; GO:0023051 regulation of signaling; GO:0044699 single-organism process; GO:0051046 regulation of secretion; GO:0002793 positive regulation of peptide secretion; GO:0044237 cellular metabolic process; GO:0009605 response to external stimulus; G…	GO:0005759 mitochondrial matrix; GO:0043229 intracellular organelle; GO:0044429 mitochondrial part; GO:0005737 cytoplasm; GO:0044446 intracellular organelle part; GO:0031981 nuclear lumen; GO:0044424 intracellular part; GO:0005623 cell; GO:0005739 mitochondrion; GO:0044422 organelle part; GO:0031974 membrane-enclosed lumen; GO:0043226 organelle; GO:0043231 intracellular membrane-bounded organelle…	GO:0008410 CoA-transferase activity; GO:0042802 identical protein binding; GO:0003824 catalytic activity; GO:0042803 protein homodimerization activity; GO:0005488 binding; GO:0046983 protein dimerization activity; GO:0005515 protein binding; GO:0016782 transferase activity, transferring sulfur-containing groups; GO:0016740 transferase activity; GO:0008260 3-oxoacid CoA-transferase activity;	K01027	OXCT; 3-oxoacid CoA-transferase [EC:2.8.3.5]	hsa00072 Synthesis and degradation of ketone bodies - Homo sapiens (human); hsa00280 Valine, leucine and isoleucine degradation - Homo sapiens (human); hsa00650 Butanoate metabolism - Homo sapiens (human); hsa01100 Metabolic pathways - Homo sapiens (human);	IPR012792; IPR012791;	3-oxoacid CoA-transferase, subunit A; 3-oxoacid CoA-transferase, subunit B;	C	KOG3822	Succinyl-CoA:alpha-ketoacid-CoA transferase
P09651	Heterogeneous nuclear ribonucleoprotein A1 OS=Homo sapiens OX=9606 GN=HNRNPA1 PE=1 SV=5	HNRNPA1	38.746	46	0.954	0.66908	nucleus	GO:0044700 single organism signaling; GO:0050658 RNA transport; GO:0065008 regulation of biological quality; GO:0007166 cell surface receptor signaling pathway; GO:0009891 positive regulation of biosynthetic process; GO:0051169 nuclear transport; GO:0046685 response to arsenic-containing substance; GO:0044237 cellular metabolic process; GO:0032204 regulation of telomere maintenance; GO:1903936 ce…	GO:0043229 intracellular organelle; GO:0016020 membrane; GO:0044421 extracellular region part; GO:0031982 vesicle; GO:0044446 intracellular organelle part; GO:0005737 cytoplasm; GO:0031981 nuclear lumen; GO:0032991 macromolecular complex; GO:0044424 intracellular part; GO:0005681 spliceosomal complex; GO:0005623 cell; GO:0005576 extracellular region; GO:0044422 organelle part; GO:0031974 membrane…	GO:0003677 DNA binding; GO:0003723 RNA binding; GO:1901265 nucleoside phosphate binding; GO:0098847 sequence-specific single stranded DNA binding; GO:0042162 telomeric DNA binding; GO:0003697 single-stranded DNA binding; GO:0005515 protein binding; GO:0000166 nucleotide binding; GO:0043565 sequence-specific DNA binding; GO:0043047 single-stranded telomeric DNA binding; GO:0003727 single-stranded …	K12741	HNRNPA1_3; heterogeneous nuclear ribonucleoprotein A1/A3	hsa03040 Spliceosome - Homo sapiens (human);	IPR000504; IPR012677;	RNA recognition motif domain; Nucleotide-binding alpha-beta plait domain;	R	KOG0118	FOG: RRM domain
Q96EY1	DnaJ homolog subfamily A member 3, mitochondrial OS=Homo sapiens OX=9606 GN=DNAJA3 PE=1 SV=2	DNAJA3	52.488	4	1.507	0.00090327	mitochondria	GO:0044700 single organism signaling; GO:0002694 regulation of leukocyte activation; GO:0010941 regulation of cell death; GO:0031347 regulation of defense response; GO:0044237 cellular metabolic process; GO:0032088 negative regulation of NF-kappaB transcription factor activity; GO:0042110 T cell activation; GO:0010466 negative regulation of peptidase activity; GO:0008152 metabolic process; GO:003…	GO:0016020 membrane; GO:0019898 extrinsic component of membrane; GO:0071944 cell periphery; GO:0030054 cell junction; GO:0005737 cytoplasm; GO:0044424 intracellular part; GO:0005623 cell; GO:0044422 organelle part; GO:0043228 non-membrane-bounded organelle; GO:0031974 membrane-enclosed lumen; GO:0098590 plasma membrane region; GO:0070013 intracellular organelle lumen; GO:0044425 membrane part; GO…	GO:1901265 nucleoside phosphate binding; GO:0005102 receptor binding; GO:0060589 nucleoside-triphosphatase regulator activity; GO:0019901 protein kinase binding; GO:0030695 GTPase regulator activity; GO:0005515 protein binding; GO:0098772 molecular function regulator; GO:0030544 Hsp70 protein binding; GO:1901363 heterocyclic compound binding; GO:0097159 organic cyclic compound binding; GO:0032553…	K09504	DNAJA3; DnaJ homolog subfamily A member 3	hsa05203 Viral carcinogenesis - Homo sapiens (human);	IPR008971; IPR002939; IPR001623; IPR001305;	HSP40/DnaJ peptide-binding; Chaperone DnaJ, C-terminal; DnaJ domain; Heat shock protein DnaJ, cysteine-rich domain;	O	KOG0715	Molecular chaperone (DnaJ superfamily)
Q9Y2U9	Kelch domain-containing protein 2 OS=Homo sapiens OX=9606 GN=KLHDC2 PE=1 SV=1	KLHDC2	46.098	2.7	0.909	0.44946	nucleus		GO:0016020 membrane; GO:0043229 intracellular organelle; GO:0031090 organelle membrane; GO:0005635 nuclear envelope; GO:0044446 intracellular organelle part; GO:0031967 organelle envelope; GO:0031981 nuclear lumen; GO:0012505 endomembrane system; GO:0044424 intracellular part; GO:0016604 nuclear body; GO:0005623 cell; GO:0044422 organelle part; GO:0031974 membrane-enclosed lumen; GO:0043226 organ…	GO:0005515 protein binding; GO:0005488 binding;				IPR015915;	Kelch-type beta propeller;	R	KOG0379	Kelch repeat-containing proteins
Q9BTX7	Alpha-tocopherol transfer protein-like OS=Homo sapiens OX=9606 GN=TTPAL PE=1 SV=2	TTPAL	38.515	8.5	0.953	0.52612	cytoplasm	GO:0006810 transport; GO:0051179 localization; GO:0051234 establishment of localization;	GO:0016020 membrane; GO:0005623 cell; GO:0005622 intracellular; GO:0044464 cell part;	GO:0005215 transporter activity;				IPR001251; IPR011074;	CRAL-TRIO lipid binding domain; CRAL/TRIO, N-terminal domain;	I	KOG1471	Phosphatidylinositol transfer protein SEC14 and related proteins
Q9BQJ4	Transmembrane protein 47 OS=Homo sapiens OX=9606 GN=TMEM47 PE=1 SV=1	TMEM47	19.997	6.1	1.476	0.0117804	plasma membrane		GO:0016020 membrane; GO:0044464 cell part; GO:0071944 cell periphery; GO:0044425 membrane part; GO:0030054 cell junction; GO:0005912 adherens junction; GO:0070161 anchoring junction; GO:0031224 intrinsic component of membrane; GO:0005623 cell; GO:0005911 cell-cell junction; GO:0016021 integral component of membrane; GO:0005886 plasma membrane;							R	KOG4671	Brain cell membrane protein 1 (BCMP1)
P80723	Brain acid soluble protein 1 OS=Homo sapiens OX=9606 GN=BASP1 PE=1 SV=2	BASP1	22.693	74.4	0.706	0.0010751	nucleus	GO:0022414 reproductive process; GO:0035282 segmentation; GO:0007420 brain development; GO:0045927 positive regulation of growth; GO:0048857 neural nucleus development; GO:0021762 substantia nigra development; GO:0051240 positive regulation of multicellular organismal process; GO:0044702 single organism reproductive process; GO:0010558 negative regulation of macromolecule biosynthetic process; GO…	GO:0016020 membrane; GO:0044421 extracellular region part; GO:0071944 cell periphery; GO:0030054 cell junction; GO:0005737 cytoplasm; GO:0031982 vesicle; GO:0030426 growth cone; GO:0044424 intracellular part; GO:0016604 nuclear body; GO:0005623 cell; GO:0044422 organelle part; GO:0043228 non-membrane-bounded organelle; GO:0031974 membrane-enclosed lumen; GO:0005856 cytoskeleton; GO:0070062 extrac…	GO:0097159 organic cyclic compound binding; GO:0000975 regulatory region DNA binding; GO:1901363 heterocyclic compound binding; GO:0003677 DNA binding; GO:0001067 regulatory region nucleic acid binding; GO:0003714 transcription corepressor activity; GO:0044212 transcription regulatory region DNA binding; GO:0005488 binding; GO:0003676 nucleic acid binding; GO:0000989 transcription factor activity…	K17272	BASP1; brain acid soluble protein 1
O60443	Gasdermin-E OS=Homo sapiens OX=9606 GN=GSDME PE=1 SV=2	GSDME	54.554	16.3	1.083	0.090102	cytoplasm	GO:0050794 regulation of cellular process; GO:0044707 single-multicellular organism process; GO:0010941 regulation of cell death; GO:0060113 inner ear receptor cell differentiation; GO:0042127 regulation of cell proliferation; GO:0023051 regulation of signaling; GO:0048869 cellular developmental process; GO:1902533 positive regulation of intracellular signal transduction; GO:0043067 regulation of…	GO:0016020 membrane; GO:0071944 cell periphery; GO:0044464 cell part; GO:0005622 intracellular; GO:0005737 cytoplasm; GO:0044424 intracellular part; GO:0005623 cell; GO:0005829 cytosol; GO:0005886 plasma membrane; GO:0044444 cytoplasmic part;		K22146	DFNA5; non-syndromic hearing impairment protein 5
P27986	Phosphatidylinositol 3-kinase regulatory subunit alpha OS=Homo sapiens OX=9606 GN=PIK3R1 PE=1 SV=2	PIK3R1	83.597	6.6	1.354	0.070661	nucleus	GO:0044700 single organism signaling; GO:0002694 regulation of leukocyte activation; GO:0010941 regulation of cell death; GO:0032680 regulation of tumor necrosis factor production; GO:0042593 glucose homeostasis; GO:0009891 positive regulation of biosynthetic process; GO:0044255 cellular lipid metabolic process; GO:1905897 regulation of response to endoplasmic reticulum stress; GO:0044237 cellula…	GO:0016020 membrane; GO:0005783 endoplasmic reticulum; GO:0042175 nuclear outer membrane-endoplasmic reticulum membrane network; GO:0061695 transferase complex, transferring phosphorus-containing groups; GO:0097038 perinuclear endoplasmic reticulum; GO:0019898 extrinsic component of membrane; GO:0030054 cell junction; GO:0071944 cell periphery; GO:0005801 cis-Golgi network; GO:0005737 cytoplasm; …	GO:0005167 neurotrophin TRK receptor binding; GO:0036312 phosphatidylinositol 3-kinase regulatory subunit binding; GO:0005068 transmembrane receptor protein tyrosine kinase adaptor activity; GO:1990782 protein tyrosine kinase binding; GO:0016773 phosphotransferase activity, alcohol group as acceptor; GO:0019903 protein phosphatase binding; GO:0005102 receptor binding; GO:0042562 hormone binding; …	K02649	PIK3R1_2_3; phosphoinositide-3-kinase regulatory subunit alpha/beta/delta	hsa01521 EGFR tyrosine kinase inhibitor resistance - Homo sapiens (human); hsa01522 Endocrine resistance - Homo sapiens (human); hsa01524 Platinum drug resistance - Homo sapiens (human); hsa04012 ErbB signaling pathway - Homo sapiens (human); hsa04014 Ras signaling pathway - Homo sapiens (human); hsa04015 Rap1 signaling pathway - Homo sapiens (human); hsa04024 cAMP signaling pathway - Homo sapien…	IPR001452; IPR000980; IPR032498; IPR008936; IPR000198;	SH3 domain; SH2 domain; PI3K p85 subunit, inter-SH2 domain; Rho GTPase activation protein; Rho GTPase-activating protein domain;	T	KOG4637	Adaptor for phosphoinositide 3-kinase
O43865	S-adenosylhomocysteine hydrolase-like protein 1 OS=Homo sapiens OX=9606 GN=AHCYL1 PE=1 SV=2	AHCYL1	58.951	29.2	1.223	0.101415	cytoplasm	GO:0044700 single organism signaling; GO:0009116 nucleoside metabolic process; GO:1904385 cellular response to angiotensin; GO:0051169 nuclear transport; GO:0044237 cellular metabolic process; GO:0015031 protein transport; GO:0042044 fluid transport; GO:0008152 metabolic process; GO:0046130 purine ribonucleoside catabolic process; GO:0032879 regulation of localization; GO:0031440 regulation of mR…	GO:0016020 membrane; GO:0042175 nuclear outer membrane-endoplasmic reticulum membrane network; GO:0044421 extracellular region part; GO:0005783 endoplasmic reticulum; GO:0016324 apical plasma membrane; GO:0071944 cell periphery; GO:0031982 vesicle; GO:0005737 cytoplasm; GO:0044424 intracellular part; GO:0005623 cell; GO:0044422 organelle part; GO:0070062 extracellular exosome; GO:0098590 plasma m…	GO:0003723 RNA binding; GO:0016801 hydrolase activity, acting on ether bonds; GO:1901265 nucleoside phosphate binding; GO:0016787 hydrolase activity; GO:0005515 protein binding; GO:0000166 nucleotide binding; GO:0048037 cofactor binding; GO:1901363 heterocyclic compound binding; GO:0097159 organic cyclic compound binding; GO:0004013 adenosylhomocysteinase activity; GO:0042802 identical protein bi…	K01251	E3.3.1.1, ahcY; adenosylhomocysteinase [EC:3.3.1.1]	hsa00270 Cysteine and methionine metabolism - Homo sapiens (human); hsa01100 Metabolic pathways - Homo sapiens (human);	IPR016040; IPR015878;	NAD(P)-binding domain; S-adenosyl-L-homocysteine hydrolase, NAD binding domain;	H	KOG1370	S-adenosylhomocysteine hydrolase
Q6NUK4	Receptor expression-enhancing protein 3 OS=Homo sapiens OX=9606 GN=REEP3 PE=1 SV=1	REEP3	29.264	4.7			mitochondria	GO:0006997 nucleus organization; GO:0016043 cellular component organization; GO:0000278 mitotic cell cycle; GO:0010256 endomembrane system organization; GO:0007067 mitotic nuclear division; GO:0048285 organelle fission; GO:0044763 single-organism cellular process; GO:0044802 single-organism membrane organization; GO:0044699 single-organism process; GO:1903047 mitotic cell cycle process; GO:000699…	GO:0043229 intracellular organelle; GO:0016020 membrane; GO:0042175 nuclear outer membrane-endoplasmic reticulum membrane network; GO:0099513 polymeric cytoskeletal fiber; GO:0005783 endoplasmic reticulum; GO:0005874 microtubule; GO:0043232 intracellular non-membrane-bounded organelle; GO:0044430 cytoskeletal part; GO:0044446 intracellular organelle part; GO:0005737 cytoplasm; GO:0031224 intrinsi…		K17338	REEP1_2_3_4; receptor expression-enhancing protein 1/2/3/4				V	KOG1726	HVA22/DP1 gene product-related proteins
Q13449	Limbic system-associated membrane protein OS=Homo sapiens OX=9606 GN=LSAMP PE=1 SV=2	LSAMP	37.393	11.5	1.019	0.8661	plasma membrane	GO:0043687 post-translational protein modification; GO:0044707 single-multicellular organism process; GO:0044267 cellular protein metabolic process; GO:0044699 single-organism process; GO:0009058 biosynthetic process; GO:0044237 cellular metabolic process; GO:0042157 lipoprotein metabolic process; GO:0071704 organic substance metabolic process; GO:0007610 behavior; GO:0022610 biological adhesion;…	GO:0016020 membrane; GO:0044464 cell part; GO:0071944 cell periphery; GO:0044425 membrane part; GO:0031225 anchored component of membrane; GO:0031224 intrinsic component of membrane; GO:0005623 cell; GO:0005576 extracellular region; GO:0005886 plasma membrane;	GO:0005515 protein binding; GO:0005488 binding;	K06772	LSAMP, LAMP; limbic system-associated membrane protein		IPR003598; IPR007110; IPR013783; IPR003599; IPR013098;	Immunoglobulin subtype 2; Immunoglobulin-like domain; Immunoglobulin-like fold; Immunoglobulin subtype; Immunoglobulin I-set;
P21980	Protein-glutamine gamma-glutamyltransferase 2 OS=Homo sapiens OX=9606 GN=TGM2 PE=1 SV=2	TGM2	77.328	27.1	1.273	0.005621	cytoplasm	GO:0044085 cellular component biogenesis; GO:0044700 single organism signaling; GO:0010941 regulation of cell death; GO:0065008 regulation of biological quality; GO:0048732 gland development; GO:0035148 tube formation; GO:0031347 regulation of defense response; GO:0044237 cellular metabolic process; GO:0008152 metabolic process; GO:0065003 macromolecular complex assembly; GO:0043122 regulation of…	GO:0016020 membrane; GO:0044421 extracellular region part; GO:0005783 endoplasmic reticulum; GO:0071944 cell periphery; GO:0030054 cell junction; GO:0031982 vesicle; GO:0005737 cytoplasm; GO:0031224 intrinsic component of membrane; GO:0044424 intracellular part; GO:0005623 cell; GO:0070062 extracellular exosome; GO:0005925 focal adhesion; GO:0044425 membrane part; GO:0005622 intracellular; GO:004…	GO:1901265 nucleoside phosphate binding; GO:0001882 nucleoside binding; GO:0043167 ion binding; GO:0005515 protein binding; GO:0000166 nucleotide binding; GO:0016755 transferase activity, transferring amino-acyl groups; GO:0097159 organic cyclic compound binding; GO:1901363 heterocyclic compound binding; GO:0032549 ribonucleoside binding; GO:0016746 transferase activity, transferring acyl groups;…	K05625	TGM2; transglutaminase 2 [EC:2.3.2.13]	hsa05016 Huntington disease - Homo sapiens (human);	IPR008958; IPR013783; IPR002931; IPR014756; IPR001102;	Transglutaminase, C-terminal; Immunoglobulin-like fold; Transglutaminase-like; Immunoglobulin E-set; Transglutaminase, N-terminal;
P05388	60S acidic ribosomal protein P0 OS=Homo sapiens OX=9606 GN=RPLP0 PE=1 SV=1	RPLP0	34.273	32.8	0.563	0.00128201	cytoplasm,nucleus	GO:0044085 cellular component biogenesis; GO:0022613 ribonucleoprotein complex biogenesis; GO:0072594 establishment of protein localization to organelle; GO:0006518 peptide metabolic process; GO:0009058 biosynthetic process; GO:0044764 multi-organism cellular process; GO:0044237 cellular metabolic process; GO:0071345 cellular response to cytokine stimulus; GO:0015031 protein transport; GO:0051234…	GO:0016020 membrane; GO:0030425 dendrite; GO:0044421 extracellular region part; GO:0005783 endoplasmic reticulum; GO:0030054 cell junction; GO:0031982 vesicle; GO:0005737 cytoplasm; GO:0032991 macromolecular complex; GO:0044424 intracellular part; GO:0005623 cell; GO:0036464 cytoplasmic ribonucleoprotein granule; GO:0044422 organelle part; GO:0043228 non-membrane-bounded organelle; GO:0070062 ext…	GO:0097159 organic cyclic compound binding; GO:1901363 heterocyclic compound binding; GO:0003723 RNA binding; GO:0005488 binding; GO:0003676 nucleic acid binding; GO:0005515 protein binding; GO:0005198 structural molecule activity; GO:0003735 structural constituent of ribosome;	K02941	RP-LP0, RPLP0; large subunit ribosomal protein LP0	hsa03010 Ribosome - Homo sapiens (human);			J	KOG0815	60S acidic ribosomal protein P0
O43292	Glycosylphosphatidylinositol anchor attachment 1 protein OS=Homo sapiens OX=9606 GN=GPAA1 PE=1 SV=3	GPAA1	67.622	8.1	0.761	0.27106	plasma membrane	GO:0044085 cellular component biogenesis; GO:0065008 regulation of biological quality; GO:0046486 glycerolipid metabolic process; GO:0006643 membrane lipid metabolic process; GO:0008654 phospholipid biosynthetic process; GO:0044699 single-organism process; GO:0009058 biosynthetic process; GO:0044255 cellular lipid metabolic process; GO:0044237 cellular metabolic process; GO:0042157 lipoprotein me…	GO:0043229 intracellular organelle; GO:0016020 membrane; GO:0042175 nuclear outer membrane-endoplasmic reticulum membrane network; GO:0005783 endoplasmic reticulum; GO:0044446 intracellular organelle part; GO:0005737 cytoplasm; GO:0032991 macromolecular complex; GO:0031224 intrinsic component of membrane; GO:0012505 endomembrane system; GO:0044424 intracellular part; GO:0005623 cell; GO:0016021 i…	GO:0015631 tubulin binding; GO:0005515 protein binding; GO:0008092 cytoskeletal protein binding; GO:0005488 binding;	K05289	GAA1; glycosylphosphatidylinositol transamidase	hsa00563 Glycosylphosphatidylinositol (GPI)-anchor biosynthesis - Homo sapiens (human); hsa01100 Metabolic pathways - Homo sapiens (human);			O	KOG3566	Glycosylphosphatidylinositol anchor attachment protein GAA1
Q9QC07	Endogenous retrovirus group K member 18 Pol protein OS=Homo sapiens OX=9606 GN=ERVK-18 PE=3 SV=2	ERVK-18	91.946	2.6	4.237	0.000160583	mitochondria	GO:0006725 cellular aromatic compound metabolic process; GO:0006259 DNA metabolic process; GO:0009058 biosynthetic process; GO:0044237 cellular metabolic process; GO:0071704 organic substance metabolic process; GO:0008152 metabolic process; GO:0046483 heterocycle metabolic process; GO:0019438 aromatic compound biosynthetic process; GO:0006139 nucleobase-containing compound metabolic process; GO:0…		GO:0003677 DNA binding; GO:0004523 RNA-DNA hybrid ribonuclease activity; GO:0043167 ion binding; GO:0003964 RNA-directed DNA polymerase activity; GO:0004521 endoribonuclease activity; GO:0016787 hydrolase activity; GO:0016891 endoribonuclease activity, producing 5'-phosphomonoesters; GO:0008270 zinc ion binding; GO:1901363 heterocyclic compound binding; GO:0097159 organic cyclic compound binding;…				IPR001584; IPR000477; IPR012337; IPR002156; IPR017856; IPR003308; IPR010661;	Integrase, catalytic core; Reverse transcriptase domain; Ribonuclease H-like domain; Ribonuclease H domain; Integrase, N-terminal zinc-binding domain-like; Integrase, N-terminal zinc-binding domain; Reverse transcriptase thumb;
P04150	Glucocorticoid receptor OS=Homo sapiens OX=9606 GN=NR3C1 PE=1 SV=1	NR3C1	85.658	13.6	1.107	0.45084	nucleus	GO:0043402 glucocorticoid mediated signaling pathway; GO:0044700 single organism signaling; GO:0097659 nucleic acid-templated transcription; GO:0007067 mitotic nuclear division; GO:0009891 positive regulation of biosynthetic process; GO:0071384 cellular response to corticosteroid stimulus; GO:0044699 single-organism process; GO:0009058 biosynthetic process; GO:0044237 cellular metabolic process; …	GO:0005737 cytoplasm; GO:0032991 macromolecular complex; GO:0044424 intracellular part; GO:0005623 cell; GO:0044422 organelle part; GO:0043228 non-membrane-bounded organelle; GO:0005856 cytoskeleton; GO:0031974 membrane-enclosed lumen; GO:0005815 microtubule organizing center; GO:0005654 nucleoplasm; GO:0070013 intracellular organelle lumen; GO:0015630 microtubule cytoskeleton; GO:0005622 intrace…	GO:0003707 steroid hormone receptor activity; GO:0000981 RNA polymerase II transcription factor activity, sequence-specific DNA binding; GO:0042562 hormone binding; GO:0038049 transcription factor activity, ligand-activated RNA polymerase II transcription factor binding; GO:0001077 transcriptional activator activity, RNA polymerase II core promoter proximal region sequence-specific binding; GO:00…	K05771	NR3C1, GR; glucocorticoid receptor	hsa04080 Neuroactive ligand-receptor interaction - Homo sapiens (human);	IPR013088; IPR000536; IPR001628;	Zinc finger, NHR/GATA-type; Nuclear hormone receptor, ligand-binding domain; Zinc finger, nuclear hormone receptor-type;	T	KOG3575	FOG: Hormone receptors
Q9H3S7	Tyrosine-protein phosphatase non-receptor type 23 OS=Homo sapiens OX=9606 GN=PTPN23 PE=1 SV=1	PTPN23	178.97	10.9	1.918	0.00117877	nucleus	GO:0044085 cellular component biogenesis; GO:0060627 regulation of vesicle-mediated transport; GO:1903391 regulation of adherens junction organization; GO:0010633 negative regulation of epithelial cell migration; GO:0060271 cilium assembly; GO:0044699 single-organism process; GO:0051241 negative regulation of multicellular organismal process; GO:0044237 cellular metabolic process; GO:0015031 prot…	GO:0044421 extracellular region part; GO:0031410 cytoplasmic vesicle; GO:0005737 cytoplasm; GO:0031982 vesicle; GO:0044424 intracellular part; GO:0016604 nuclear body; GO:0005623 cell; GO:0044422 organelle part; GO:0005769 early endosome; GO:0043228 non-membrane-bounded organelle; GO:0070062 extracellular exosome; GO:0031974 membrane-enclosed lumen; GO:0005856 cytoskeleton; GO:0005654 nucleoplasm…	GO:0004725 protein tyrosine phosphatase activity; GO:0003824 catalytic activity; GO:0042578 phosphoric ester hydrolase activity; GO:0005488 binding; GO:0016791 phosphatase activity; GO:0019901 protein kinase binding; GO:0016788 hydrolase activity, acting on ester bonds; GO:0016787 hydrolase activity; GO:0005515 protein binding; GO:0004721 phosphoprotein phosphatase activity; GO:0019900 kinase bin…	K18040	PTPN23; tyrosine-protein phosphatase non-receptor type 23 [EC:3.1.3.48]		IPR029021; IPR000387; IPR003595; IPR000242; IPR025304; IPR004328;	Protein-tyrosine phosphatase-like; Tyrosine specific protein phosphatases domain; Protein-tyrosine phosphatase, catalytic; PTP type protein phosphatase; ALIX V-shaped domain; BRO1 domain;	R	KOG2220	Predicted signal transduction protein
Q14315	Filamin-C OS=Homo sapiens OX=9606 GN=FLNC PE=1 SV=3	FLNC	291.02	54.5	0.766	1.9416e-06	cytoplasm	GO:0032502 developmental process; GO:0055001 muscle cell development; GO:0044085 cellular component biogenesis; GO:0051146 striated muscle cell differentiation; GO:0034329 cell junction assembly; GO:0016043 cellular component organization; GO:0048747 muscle fiber development; GO:0048869 cellular developmental process; GO:0044763 single-organism cellular process; GO:0044699 single-organism process…	GO:0016020 membrane; GO:0030054 cell junction; GO:0071944 cell periphery; GO:0030016 myofibril; GO:0005737 cytoplasm; GO:0099512 supramolecular fiber; GO:0044424 intracellular part; GO:0030018 Z disc; GO:0016528 sarcoplasm; GO:0099080 supramolecular complex; GO:0005623 cell; GO:0031674 I band; GO:0044422 organelle part; GO:0043228 non-membrane-bounded organelle; GO:0005856 cytoskeleton; GO:000592…	GO:0051015 actin filament binding; GO:0008092 cytoskeletal protein binding; GO:0005488 binding; GO:0044877 macromolecular complex binding; GO:0003779 actin binding; GO:0005515 protein binding; GO:0030506 ankyrin binding; GO:0032403 protein complex binding;	K04437	FLNA; filamin	hsa04010 MAPK signaling pathway - Homo sapiens (human); hsa04510 Focal adhesion - Homo sapiens (human); hsa05132 Salmonella infection - Homo sapiens (human); hsa05205 Proteoglycans in cancer - Homo sapiens (human);	IPR013783; IPR014756; IPR001715;	Immunoglobulin-like fold; Immunoglobulin E-set; Calponin homology domain;	Z	KOG0518	Actin-binding cytoskeleton protein, filamin
P14868	Aspartate--tRNA ligase, cytoplasmic OS=Homo sapiens OX=9606 GN=DARS PE=1 SV=2	DARS	57.136	54.5	0.745	0.0068607	cytoplasm	GO:0044085 cellular component biogenesis; GO:0016043 cellular component organization; GO:0006518 peptide metabolic process; GO:0006725 cellular aromatic compound metabolic process; GO:0044267 cellular protein metabolic process; GO:0044699 single-organism process; GO:0006422 aspartyl-tRNA aminoacylation; GO:0009058 biosynthetic process; GO:1901566 organonitrogen compound biosynthetic process; GO:0…	GO:0016020 membrane; GO:0044421 extracellular region part; GO:0031982 vesicle; GO:0005737 cytoplasm; GO:0044424 intracellular part; GO:0005623 cell; GO:0005829 cytosol; GO:0005576 extracellular region; GO:0043226 organelle; GO:0070062 extracellular exosome; GO:0005622 intracellular; GO:0044464 cell part; GO:1903561 extracellular vesicle; GO:0043227 membrane-bounded organelle; GO:0043230 extracell…	GO:0016876 ligase activity, forming aminoacyl-tRNA and related compounds; GO:1901265 nucleoside phosphate binding; GO:0016875 ligase activity, forming carbon-oxygen bonds; GO:0016874 ligase activity; GO:0016787 hydrolase activity; GO:0005515 protein binding; GO:1901363 heterocyclic compound binding; GO:0097159 organic cyclic compound binding; GO:0003824 catalytic activity; GO:0032553 ribonucleoti…	K22503	hsa00970 Aminoacyl-tRNA biosynthesis - Homo sapiens (human);		IPR004364; IPR012340; IPR004365; IPR006195;	Aminoacyl-tRNA synthetase, class II (D/K/N); Nucleic acid-binding, OB-fold; OB-fold nucleic acid binding domain, AA-tRNA synthetase-type; Aminoacyl-tRNA synthetase, class II;	J	KOG0556	Aspartyl-tRNA synthetase
P29992	Guanine nucleotide-binding protein subunit alpha-11 OS=Homo sapiens OX=9606 GN=GNA11 PE=1 SV=2	GNA11	42.123	32.6	0.906	0.0163014	cytoplasm	GO:0044700 single organism signaling; GO:0065008 regulation of biological quality; GO:0007596 blood coagulation; GO:0045634 regulation of melanocyte differentiation; GO:0044699 single-organism process; GO:0009611 response to wounding; GO:0009605 response to external stimulus; GO:0007213 G-protein coupled acetylcholine receptor signaling pathway; GO:0007165 signal transduction; GO:0007507 heart de…	GO:0016020 membrane; GO:0044421 extracellular region part; GO:0019898 extrinsic component of membrane; GO:0031090 organelle membrane; GO:0098796 membrane protein complex; GO:0071944 cell periphery; GO:0031982 vesicle; GO:0005737 cytoplasm; GO:0097730 non-motile cilium; GO:0032991 macromolecular complex; GO:0044424 intracellular part; GO:0031234 extrinsic component of cytoplasmic side of plasma me…	GO:1901265 nucleoside phosphate binding; GO:0005102 receptor binding; GO:0031683 G-protein beta/gamma-subunit complex binding; GO:0016817 hydrolase activity, acting on acid anhydrides; GO:0016787 hydrolase activity; GO:0031826 type 2A serotonin receptor binding; GO:0005515 protein binding; GO:0004871 signal transducer activity; GO:1901363 heterocyclic compound binding; GO:0097159 organic cyclic c…	K04635	GNA11; guanine nucleotide-binding protein subunit alpha-11	hsa04020 Calcium signaling pathway - Homo sapiens (human); hsa04022 cGMP-PKG signaling pathway - Homo sapiens (human); hsa04270 Vascular smooth muscle contraction - Homo sapiens (human); hsa04540 Gap junction - Homo sapiens (human); hsa04725 Cholinergic synapse - Homo sapiens (human); hsa04730 Long-term depression - Homo sapiens (human); hsa04911 Insulin secretion - Homo sapiens (human); hsa04912…	IPR027417; IPR011025;	P-loop containing nucleoside triphosphate hydrolase; G protein alpha subunit, helical insertion;	T	KOG0085	G protein subunit Galphaq/Galphay, small G protein superfamily
Q9UBN7	Histone deacetylase 6 OS=Homo sapiens OX=9606 GN=HDAC6 PE=1 SV=2	HDAC6	131.42	0.7	1.401	0.1195	nucleus	GO:0044085 cellular component biogenesis; GO:0010941 regulation of cell death; GO:0009891 positive regulation of biosynthetic process; GO:0006914 autophagy; GO:0044237 cellular metabolic process; GO:0010821 regulation of mitochondrion organization; GO:0010469 regulation of receptor activity; GO:0044782 cilium organization; GO:0008152 metabolic process; GO:0070845 polyubiquitinated misfolded prote…	GO:0016020 membrane; GO:0030425 dendrite; GO:0098857 membrane microdomain; GO:0005737 cytoplasm; GO:0043025 neuronal cell body; GO:0032991 macromolecular complex; GO:0099080 supramolecular complex; GO:0005623 cell; GO:0044422 organelle part; GO:0043228 non-membrane-bounded organelle; GO:0005654 nucleoplasm; GO:0098590 plasma membrane region; GO:0005622 intracellular; GO:0098589 membrane region; G…	GO:0070840 dynein complex binding; GO:0032041 NAD-dependent histone deacetylase activity (H3-K14 specific); GO:0031625 ubiquitin protein ligase binding; GO:0042903 tubulin deacetylase activity; GO:0048487 beta-tubulin binding; GO:0016787 hydrolase activity; GO:0005515 protein binding; GO:0043014 alpha-tubulin binding; GO:0032182 ubiquitin-like protein binding; GO:0001047 core promoter binding; GO…	K11407	HDAC6; histone deacetylase 6 [EC:3.5.1.98]	hsa05034 Alcoholism - Homo sapiens (human); hsa05203 Viral carcinogenesis - Homo sapiens (human);	IPR001607; IPR013083; IPR023801;	Zinc finger, UBP-type; Zinc finger, RING/FYVE/PHD-type; Histone deacetylase domain;	B	KOG1343	Histone deacetylase complex, catalytic component HDA1
Q08378	Golgin subfamily A member 3 OS=Homo sapiens OX=9606 GN=GOLGA3 PE=1 SV=2	GOLGA3	167.35	18.1	1.41	0.00043978	nucleus	GO:0000003 reproduction; GO:0048232 male gamete generation; GO:0022414 reproductive process; GO:0006891 intra-Golgi vesicle-mediated transport; GO:0007283 spermatogenesis; GO:0016192 vesicle-mediated transport; GO:0019953 sexual reproduction; GO:0048193 Golgi vesicle transport; GO:0044699 single-organism process; GO:0032501 multicellular organismal process; GO:0007276 gamete generation; GO:005170…	GO:0016020 membrane; GO:0019898 extrinsic component of membrane; GO:0031090 organelle membrane; GO:0005737 cytoplasm; GO:0032991 macromolecular complex; GO:0044424 intracellular part; GO:0005623 cell; GO:0044422 organelle part; GO:0090498 extrinsic component of Golgi membrane; GO:0043228 non-membrane-bounded organelle; GO:0031974 membrane-enclosed lumen; GO:0005654 nucleoplasm; GO:0070013 intrace…	GO:0050839 cell adhesion molecule binding; GO:0005515 protein binding; GO:0005488 binding; GO:0005215 transporter activity; GO:0045296 cadherin binding;
Q9H1X3	DnaJ homolog subfamily C member 25 OS=Homo sapiens OX=9606 GN=DNAJC25 PE=1 SV=1	DNAJC25	42.403	3.3	5.51	2.2311e-05	plasma membrane		GO:0031224 intrinsic component of membrane; GO:0016020 membrane; GO:0016021 integral component of membrane; GO:0044425 membrane part;		K19371	DNAJC25; DnaJ homolog subfamily C member 25		IPR001623;	DnaJ domain;	O	KOG0722	Molecular chaperone (DnaJ superfamily)
Q5RI15	Cytochrome c oxidase assembly protein COX20, mitochondrial OS=Homo sapiens OX=9606 GN=COX20 PE=1 SV=2	COX20	13.291	22.9	0.708	0.0030775	cytoplasm	GO:0044085 cellular component biogenesis; GO:0016043 cellular component organization; GO:0034622 cellular macromolecular complex assembly; GO:0071822 protein complex subunit organization; GO:0017004 cytochrome complex assembly; GO:0008535 respiratory chain complex IV assembly; GO:0055114 oxidation-reduction process; GO:0044763 single-organism cellular process; GO:0044699 single-organism process; …	GO:0043229 intracellular organelle; GO:0016020 membrane; GO:0044429 mitochondrial part; GO:0031090 organelle membrane; GO:0005737 cytoplasm; GO:0044446 intracellular organelle part; GO:0031967 organelle envelope; GO:0031224 intrinsic component of membrane; GO:0044424 intracellular part; GO:0005623 cell; GO:0016021 integral component of membrane; GO:0044422 organelle part; GO:0005739 mitochondrion…		K18184	COX20; cytochrome c oxidase assembly protein subunit 20	hsa04714 Thermogenesis - Homo sapiens (human);
P49327	Fatty acid synthase OS=Homo sapiens OX=9606 GN=FASN PE=1 SV=3	FASN	273.42	32.5	0.942	0.024504	cytoplasm	GO:0051188 cofactor biosynthetic process; GO:0001649 osteoblast differentiation; GO:0048732 gland development; GO:0016053 organic acid biosynthetic process; GO:0035337 fatty-acyl-CoA metabolic process; GO:0048869 cellular developmental process; GO:0044699 single-organism process; GO:0044255 cellular lipid metabolic process; GO:0009058 biosynthetic process; GO:0071345 cellular response to cytokine…	GO:0097708 intracellular vesicle; GO:0043229 intracellular organelle; GO:0016020 membrane; GO:0044421 extracellular region part; GO:0031410 cytoplasmic vesicle; GO:0071944 cell periphery; GO:0042470 melanosome; GO:0031982 vesicle; GO:0005737 cytoplasm; GO:0012505 endomembrane system; GO:0044424 intracellular part; GO:0005829 cytosol; GO:0005623 cell; GO:0005576 extracellular region; GO:0005739 mi…	GO:0016417 S-acyltransferase activity; GO:1901265 nucleoside phosphate binding; GO:0004319 enoyl-[acyl-carrier-protein] reductase (NADPH, B-specific) activity; GO:0016628 oxidoreductase activity, acting on the CH-CH group of donors, NAD or NADP as acceptor; GO:0046983 protein dimerization activity; GO:0070402 NADPH binding; GO:0005515 protein binding; GO:0016787 hydrolase activity; GO:0047117 eno…	K00665	FASN; fatty acid synthase, animal type [EC:2.3.1.85]	hsa00061 Fatty acid biosynthesis - Homo sapiens (human); hsa01100 Metabolic pathways - Homo sapiens (human); hsa01212 Fatty acid metabolism - Homo sapiens (human); hsa04152 AMPK signaling pathway - Homo sapiens (human); hsa04910 Insulin signaling pathway - Homo sapiens (human);	IPR016035; IPR020807; IPR013149; IPR020841; IPR011032; IPR020843; IPR016036; IPR013217; IPR013968; IPR032821; IPR014031; IPR029058; IPR029063; IPR014043; IPR014030; IPR020801; IPR016039; IPR020806; IPR023102; IPR016040; IPR009081; IPR001031; IPR001227;	Acyl transferase/acyl hydrolase/lysophospholipase; Polyketide synthase, dehydratase domain; Alcohol dehydrogenase, C-terminal; Polyketide synthase, beta-ketoacyl synthase domain; GroES-like; Polyketide synthase, enoylreductase domain; Malonyl-CoA ACP transacylase, ACP-binding; Methyltransferase type 12; Polyketide synthase, ketoreductase domain; Ketoacyl-synthetase, C-terminal extension; Beta-ket…	I	KOG1202	Animal-type fatty acid synthase and related proteins
O75342	Arachidonate 12-lipoxygenase, 12R-type OS=Homo sapiens OX=9606 GN=ALOX12B PE=1 SV=1	ALOX12B	80.355	1	0.315	0.00029976	cytoplasm	GO:0065008 regulation of biological quality; GO:0032270 positive regulation of cellular protein metabolic process; GO:0006672 ceramide metabolic process; GO:0044255 cellular lipid metabolic process; GO:0044237 cellular metabolic process; GO:0042157 lipoprotein metabolic process; GO:0008610 lipid biosynthetic process; GO:0008152 metabolic process; GO:0030148 sphingolipid biosynthetic process; GO:0…	GO:0044464 cell part; GO:0005622 intracellular; GO:0005737 cytoplasm; GO:0044424 intracellular part; GO:0005623 cell; GO:0005829 cytosol; GO:0044444 cytoplasmic part;	GO:0004052 arachidonate 12-lipoxygenase activity; GO:0016702 oxidoreductase activity, acting on single donors with incorporation of molecular oxygen, incorporation of two atoms of oxygen; GO:1990136 linoleate 9S-lipoxygenase activity; GO:0005506 iron ion binding; GO:0016701 oxidoreductase activity, acting on single donors with incorporation of molecular oxygen; GO:0046914 transition metal ion bin…	K08021	ALOX12B; arachidonate 12-lipoxygenase (R-type) [EC:1.13.11.-]	hsa00590 Arachidonic acid metabolism - Homo sapiens (human); hsa01100 Metabolic pathways - Homo sapiens (human); hsa04726 Serotonergic synapse - Homo sapiens (human);	IPR001024; IPR013819;	PLAT/LH2 domain; Lipoxygenase, C-terminal;
O60306	RNA helicase aquarius OS=Homo sapiens OX=9606 GN=AQR PE=1 SV=4	AQR	171.29	1.7	1.471	0.0120223	cytoplasm	GO:0033554 cellular response to stress; GO:0006283 transcription-coupled nucleotide-excision repair; GO:0006725 cellular aromatic compound metabolic process; GO:0006259 DNA metabolic process; GO:0006289 nucleotide-excision repair; GO:0050896 response to stimulus; GO:0044237 cellular metabolic process; GO:0071704 organic substance metabolic process; GO:0000398 mRNA splicing, via spliceosome; GO:00…	GO:0043229 intracellular organelle; GO:0016020 membrane; GO:0044446 intracellular organelle part; GO:0032991 macromolecular complex; GO:0031981 nuclear lumen; GO:0044424 intracellular part; GO:0005681 spliceosomal complex; GO:0005623 cell; GO:0044422 organelle part; GO:0043226 organelle; GO:0043231 intracellular membrane-bounded organelle; GO:0031974 membrane-enclosed lumen; GO:1902494 catalytic …	GO:0097159 organic cyclic compound binding; GO:1901363 heterocyclic compound binding; GO:0003723 RNA binding; GO:0005515 protein binding; GO:0005488 binding; GO:0003676 nucleic acid binding;	K12874	AQR; intron-binding protein aquarius	hsa03040 Spliceosome - Homo sapiens (human);	IPR032174; IPR027417;	Intron-binding protein aquarius, N-terminal; P-loop containing nucleoside triphosphate hydrolase;	L	KOG1806	DEAD box containing helicases
Q13438	Protein OS-9 OS=Homo sapiens OX=9606 GN=OS9 PE=1 SV=1	OS9	75.561	6.7	2.544	0.00046042	endoplasmic reticulum	GO:0036508 protein alpha-1,2-demannosylation; GO:0065008 regulation of biological quality; GO:1904380 endoplasmic reticulum mannose trimming; GO:0006517 protein deglycosylation; GO:0090317 negative regulation of intracellular protein transport; GO:0044699 single-organism process; GO:0036503 ERAD pathway; GO:1905897 regulation of response to endoplasmic reticulum stress; GO:0044237 cellular metabo…	GO:0000153 cytoplasmic ubiquitin ligase complex; GO:0016020 membrane; GO:0005788 endoplasmic reticulum lumen; GO:0043229 intracellular organelle; GO:0042175 nuclear outer membrane-endoplasmic reticulum membrane network; GO:0005783 endoplasmic reticulum; GO:0005737 cytoplasm; GO:0044446 intracellular organelle part; GO:0032991 macromolecular complex; GO:0012505 endomembrane system; GO:0044424 intr…	GO:0002020 protease binding; GO:0030246 carbohydrate binding; GO:0097367 carbohydrate derivative binding; GO:0005515 protein binding; GO:0001948 glycoprotein binding; GO:0019899 enzyme binding; GO:0005488 binding;	K10088	OS9; protein OS-9	hsa04141 Protein processing in endoplasmic reticulum - Homo sapiens (human);	IPR009011; IPR012913;	Mannose-6-phosphate receptor binding domain; Glucosidase II beta subunit-like;	R	KOG3394	Protein OS-9
Q7Z569	BRCA1-associated protein OS=Homo sapiens OX=9606 GN=BRAP PE=1 SV=2	BRAP	67.304	4.1	1.085	0.25824	cytoplasm	GO:0044700 single organism signaling; GO:0050794 regulation of cellular process; GO:0016310 phosphorylation; GO:0009968 negative regulation of signal transduction; GO:0023051 regulation of signaling; GO:0044267 cellular protein metabolic process; GO:0044699 single-organism process; GO:0048519 negative regulation of biological process; GO:0048523 negative regulation of cellular process; GO:0050896…	GO:0016020 membrane; GO:0043229 intracellular organelle; GO:0031090 organelle membrane; GO:0005635 nuclear envelope; GO:0044446 intracellular organelle part; GO:0031967 organelle envelope; GO:0005737 cytoplasm; GO:0032991 macromolecular complex; GO:0012505 endomembrane system; GO:0044424 intracellular part; GO:1990234 transferase complex; GO:0005623 cell; GO:0005829 cytosol; GO:0044422 organelle …	GO:1901265 nucleoside phosphate binding; GO:0019787 ubiquitin-like protein transferase activity; GO:0043167 ion binding; GO:0005515 protein binding; GO:0033218 amide binding; GO:0061659 ubiquitin-like protein ligase activity; GO:0000166 nucleotide binding; GO:0008270 zinc ion binding; GO:0005048 signal sequence binding; GO:1901363 heterocyclic compound binding; GO:0097159 organic cyclic compound …	K10632	BRAP; BRCA1-associated protein [EC:2.3.2.27]	hsa04014 Ras signaling pathway - Homo sapiens (human);	IPR001607; IPR011422; IPR001841; IPR000504; IPR013083; IPR012677;	Zinc finger, UBP-type; BRCA1-associated 2; Zinc finger, RING-type; RNA recognition motif domain; Zinc finger, RING/FYVE/PHD-type; Nucleotide-binding alpha-beta plait domain;	R	KOG0804	Cytoplasmic Zn-finger protein BRAP2 (BRCA1 associated protein)
Q6P3X3	Tetratricopeptide repeat protein 27 OS=Homo sapiens OX=9606 GN=TTC27 PE=1 SV=1	TTC27	96.631	3.7	1.243	0.077943	cytoplasm			GO:0005515 protein binding; GO:0005488 binding;				IPR011990; IPR013026;	Tetratricopeptide-like helical domain; Tetratricopeptide repeat-containing domain;	R	KOG1128	Uncharacterized conserved protein, contains TPR repeats
Q9H974	Queuine tRNA-ribosyltransferase accessory subunit 2 OS=Homo sapiens OX=9606 GN=QTRT2 PE=1 SV=1	QTRT2	46.712	3.6	2.916	7.9312e-07	cytoplasm	GO:0009116 nucleoside metabolic process; GO:0006725 cellular aromatic compound metabolic process; GO:0044699 single-organism process; GO:0009163 nucleoside biosynthetic process; GO:0009058 biosynthetic process; GO:1901566 organonitrogen compound biosynthetic process; GO:0009451 RNA modification; GO:0044237 cellular metabolic process; GO:0071704 organic substance metabolic process; GO:0008152 meta…	GO:0043229 intracellular organelle; GO:0016020 membrane; GO:0019867 outer membrane; GO:0044429 mitochondrial part; GO:0098588 bounding membrane of organelle; GO:0031090 organelle membrane; GO:0005741 mitochondrial outer membrane; GO:0005737 cytoplasm; GO:0044446 intracellular organelle part; GO:0031967 organelle envelope; GO:0044424 intracellular part; GO:0005623 cell; GO:0044422 organelle part; …	GO:0016763 transferase activity, transferring pentosyl groups; GO:0042802 identical protein binding; GO:0046982 protein heterodimerization activity; GO:0003824 catalytic activity; GO:0008479 queuine tRNA-ribosyltransferase activity; GO:0042803 protein homodimerization activity; GO:0005488 binding; GO:0043167 ion binding; GO:0046983 protein dimerization activity; GO:0046872 metal ion binding; GO:0…	K15407	QTRTD1; queuine tRNA-ribosyltransferase subunit QTRTD1 [EC:2.4.2.29]				A	KOG3909	Queuine-tRNA ribosyltransferase
Q8NCL4	Polypeptide N-acetylgalactosaminyltransferase 6 OS=Homo sapiens OX=9606 GN=GALNT6 PE=2 SV=2	GALNT6	71.158	8.2	1.933	0.022645	extracellular	GO:0006486 protein glycosylation; GO:0043413 macromolecule glycosylation; GO:0009101 glycoprotein biosynthetic process; GO:0044763 single-organism cellular process; GO:0044267 cellular protein metabolic process; GO:0009100 glycoprotein metabolic process; GO:0044699 single-organism process; GO:0009058 biosynthetic process; GO:0044238 primary metabolic process; GO:0044237 cellular metabolic process…	GO:0043229 intracellular organelle; GO:0016020 membrane; GO:0098588 bounding membrane of organelle; GO:0031090 organelle membrane; GO:0044446 intracellular organelle part; GO:0005737 cytoplasm; GO:0000139 Golgi membrane; GO:0031224 intrinsic component of membrane; GO:0012505 endomembrane system; GO:0044424 intracellular part; GO:0005623 cell; GO:0016021 integral component of membrane; GO:0044422 …	GO:0004653 polypeptide N-acetylgalactosaminyltransferase activity; GO:0016758 transferase activity, transferring hexosyl groups; GO:0003824 catalytic activity; GO:0005488 binding; GO:0043167 ion binding; GO:0030246 carbohydrate binding; GO:0046872 metal ion binding; GO:0043169 cation binding; GO:0008194 UDP-glycosyltransferase activity; GO:0016757 transferase activity, transferring glycosyl group…	K00710	GALNT; polypeptide N-acetylgalactosaminyltransferase [EC:2.4.1.41]	hsa00512 Mucin type O-glycan biosynthesis - Homo sapiens (human); hsa01100 Metabolic pathways - Homo sapiens (human);	IPR029044; IPR000772; IPR001173;	Nucleotide-diphospho-sugar transferases; Ricin B, lectin domain; Glycosyltransferase 2-like;	O	KOG3736	Polypeptide N-acetylgalactosaminyltransferase
P50453	Serpin B9 OS=Homo sapiens OX=9606 GN=SERPINB9 PE=1 SV=1	SERPINB9	42.403	19.9	0.972	0.0115382	extracellular	GO:0065008 regulation of biological quality; GO:0010941 regulation of cell death; GO:0043627 response to estrogen; GO:0002698 negative regulation of immune effector process; GO:0044699 single-organism process; GO:0052040 modulation by symbiont of host programmed cell death; GO:0035821 modification of morphology or physiology of other organism; GO:0031347 regulation of defense response; GO:0052150…	GO:0043229 intracellular organelle; GO:0016020 membrane; GO:0005615 extracellular space; GO:0044421 extracellular region part; GO:0031982 vesicle; GO:0005737 cytoplasm; GO:0044424 intracellular part; GO:0005829 cytosol; GO:0005623 cell; GO:0005576 extracellular region; GO:0043231 intracellular membrane-bounded organelle; GO:0043226 organelle; GO:0070062 extracellular exosome; GO:0005634 nucleus; …	GO:0043027 cysteine-type endopeptidase inhibitor activity involved in apoptotic process; GO:0061134 peptidase regulator activity; GO:0043028 cysteine-type endopeptidase regulator activity involved in apoptotic process; GO:0005515 protein binding; GO:0004857 enzyme inhibitor activity; GO:0098772 molecular function regulator; GO:0004866 endopeptidase inhibitor activity; GO:0004869 cysteine-type end…	K13963	SERPINB; serpin B	hsa05146 Amoebiasis - Homo sapiens (human);	IPR023796;	Serpin domain;	V	KOG2392	Serpin
Q9UPN4	Centrosomal protein of 131 kDa OS=Homo sapiens OX=9606 GN=CEP131 PE=1 SV=3	CEP131	122.15	2.5	3.367	2.3034e-05	cytoplasm,nucleus	GO:0098840 protein transport along microtubule; GO:0044085 cellular component biogenesis; GO:0022414 reproductive process; GO:0048869 cellular developmental process; GO:1905508 protein localization to microtubule organizing center; GO:0060271 cilium assembly; GO:0044699 single-organism process; GO:0010564 regulation of cell cycle process; GO:0015031 protein transport; GO:0044782 cilium organizati…	GO:0044421 extracellular region part; GO:0044450 microtubule organizing center part; GO:0031410 cytoplasmic vesicle; GO:0035869 ciliary transition zone; GO:0005737 cytoplasm; GO:0031982 vesicle; GO:0044424 intracellular part; GO:0005623 cell; GO:0044422 organelle part; GO:0043228 non-membrane-bounded organelle; GO:0005856 cytoskeleton; GO:0005815 microtubule organizing center; GO:0015630 microtub…	GO:0042802 identical protein binding; GO:0042803 protein homodimerization activity; GO:0005488 binding; GO:0044877 macromolecular complex binding; GO:0046983 protein dimerization activity; GO:0005515 protein binding; GO:0032403 protein complex binding;	K16540	AZI1, CEP131; 5-azacytidine-induced protein 1
P08123	Collagen alpha-2(I) chain OS=Homo sapiens OX=9606 GN=COL1A2 PE=1 SV=7	COL1A2	129.31	64.8	9.04	1.1993e-07	extracellular	GO:0044085 cellular component biogenesis; GO:0044700 single organism signaling; GO:0001101 response to acid chemical; GO:0007596 blood coagulation; GO:0065008 regulation of biological quality; GO:0051674 localization of cell; GO:0030199 collagen fibril organization; GO:0007166 cell surface receptor signaling pathway; GO:0001568 blood vessel development; GO:0071560 cellular response to transformin…	GO:0005584 collagen type I trimer; GO:0005615 extracellular space; GO:0005783 endoplasmic reticulum; GO:0044421 extracellular region part; GO:0098643 banded collagen fibril; GO:0031982 vesicle; GO:0005737 cytoplasm; GO:0005583 fibrillar collagen trimer; GO:0032991 macromolecular complex; GO:0044424 intracellular part; GO:0099512 supramolecular fiber; GO:0005623 cell; GO:0099080 supramolecular com…	GO:0005201 extracellular matrix structural constituent; GO:0030674 protein binding, bridging; GO:0042802 identical protein binding; GO:0019838 growth factor binding; GO:0005488 binding; GO:0043167 ion binding; GO:0048407 platelet-derived growth factor binding; GO:0046872 metal ion binding; GO:0043169 cation binding; GO:0005515 protein binding; GO:0060090 binding, bridging; GO:0046332 SMAD binding…	K06236	COL1A; collagen, type I, alpha	hsa04151 PI3K-Akt signaling pathway - Homo sapiens (human); hsa04510 Focal adhesion - Homo sapiens (human); hsa04512 ECM-receptor interaction - Homo sapiens (human); hsa04611 Platelet activation - Homo sapiens (human); hsa04926 Relaxin signaling pathway - Homo sapiens (human); hsa04933 AGE-RAGE signaling pathway in diabetic complications - Homo sapiens (human); hsa04974 Protein digestion and abso…	IPR000885;	Fibrillar collagen, C-terminal;	W	KOG3544	Collagens (type IV and type XIII), and related proteins
O95159	Zinc finger protein-like 1 OS=Homo sapiens OX=9606 GN=ZFPL1 PE=1 SV=2	ZFPL1	34.114	7.7	1.454	0.58032	nucleus	GO:0050794 regulation of cellular process; GO:0010468 regulation of gene expression; GO:0006355 regulation of transcription, DNA-templated; GO:0031326 regulation of cellular biosynthetic process; GO:0080090 regulation of primary metabolic process; GO:0060255 regulation of macromolecule metabolic process; GO:0016192 vesicle-mediated transport; GO:0019219 regulation of nucleobase-containing compoun…	GO:0043229 intracellular organelle; GO:0016020 membrane; GO:0005737 cytoplasm; GO:0031224 intrinsic component of membrane; GO:0012505 endomembrane system; GO:0044424 intracellular part; GO:0005623 cell; GO:0016021 integral component of membrane; GO:0043231 intracellular membrane-bounded organelle; GO:0043226 organelle; GO:0005634 nucleus; GO:0044425 membrane part; GO:0005622 intracellular; GO:004…	GO:0097159 organic cyclic compound binding; GO:1901363 heterocyclic compound binding; GO:0003677 DNA binding; GO:0046914 transition metal ion binding; GO:0005488 binding; GO:0043167 ion binding; GO:0003676 nucleic acid binding; GO:0043169 cation binding; GO:0046872 metal ion binding; GO:0008270 zinc ion binding;				IPR013083;	Zinc finger, RING/FYVE/PHD-type;	O	KOG3970	Predicted E3 ubiquitin ligase
Q9BQ69	ADP-ribose glycohydrolase MACROD1 OS=Homo sapiens OX=9606 GN=MACROD1 PE=1 SV=2	MACROD1	35.505	7.1	1.3	0.44534	mitochondria	GO:0033554 cellular response to stress; GO:0042278 purine nucleoside metabolic process; GO:0009116 nucleoside metabolic process; GO:0006725 cellular aromatic compound metabolic process; GO:0044267 cellular protein metabolic process; GO:0044699 single-organism process; GO:0050896 response to stimulus; GO:0044237 cellular metabolic process; GO:0071704 organic substance metabolic process; GO:0051725…	GO:0043229 intracellular organelle; GO:0005737 cytoplasm; GO:0044446 intracellular organelle part; GO:0031981 nuclear lumen; GO:0044424 intracellular part; GO:0005623 cell; GO:0005739 mitochondrion; GO:0044422 organelle part; GO:0043226 organelle; GO:0043231 intracellular membrane-bounded organelle; GO:0031974 membrane-enclosed lumen; GO:0005654 nucleoplasm; GO:0005634 nucleus; GO:0070013 intrace…	GO:0019213 deacetylase activity; GO:0005515 protein binding; GO:0016787 hydrolase activity; GO:0003824 catalytic activity; GO:0005488 binding; GO:0016798 hydrolase activity, acting on glycosyl bonds;				IPR002589;	Macro domain;	BK	KOG2633	Hismacro and SEC14 domain-containing proteins
P18084	Integrin beta-5 OS=Homo sapiens OX=9606 GN=ITGB5 PE=1 SV=1	ITGB5	88.053	4.6	3.655	6.4483e-05	extracellular	GO:0044085 cellular component biogenesis; GO:0044409 entry into host; GO:0044700 single organism signaling; GO:0003012 muscle system process; GO:0007166 cell surface receptor signaling pathway; GO:0048869 cellular developmental process; GO:0071560 cellular response to transforming growth factor beta stimulus; GO:0030038 contractile actin filament bundle assembly; GO:0044699 single-organism proces…	GO:0016020 membrane; GO:0044421 extracellular region part; GO:0098636 protein complex involved in cell adhesion; GO:0031410 cytoplasmic vesicle; GO:0030054 cell junction; GO:0071944 cell periphery; GO:0098796 membrane protein complex; GO:0005737 cytoplasm; GO:0031982 vesicle; GO:0031224 intrinsic component of membrane; GO:0032991 macromolecular complex; GO:0044424 intracellular part; GO:0005887 i…	GO:0060089 molecular transducer activity; GO:0005515 protein binding; GO:0004872 receptor activity; GO:0001618 virus receptor activity; GO:0005488 binding;	K06588	ITGB5; integrin beta 5	hsa04145 Phagosome - Homo sapiens (human); hsa04151 PI3K-Akt signaling pathway - Homo sapiens (human); hsa04510 Focal adhesion - Homo sapiens (human); hsa04512 ECM-receptor interaction - Homo sapiens (human); hsa04810 Regulation of actin cytoskeleton - Homo sapiens (human); hsa05165 Human papillomavirus infection - Homo sapiens (human); hsa05205 Proteoglycans in cancer - Homo sapiens (human); hsa…	IPR032695; IPR033760; IPR002369; IPR016201; IPR012896; IPR014836; IPR002035;	Integrin domain; Integrin beta N-terminal; Integrin beta subunit, VWA domain; PSI domain; Integrin beta subunit, tail; Integrin beta subunit, cytoplasmic domain; von Willebrand factor, type A;	TW	KOG1226	Integrin beta subunit (N-terminal portion of extracellular region)
Q9UK45	U6 snRNA-associated Sm-like protein LSm7 OS=Homo sapiens OX=9606 GN=LSM7 PE=1 SV=1	LSM7	11.602	25.2			mitochondria	GO:0006725 cellular aromatic compound metabolic process; GO:0060255 regulation of macromolecule metabolic process; GO:0048519 negative regulation of biological process; GO:0044237 cellular metabolic process; GO:0071704 organic substance metabolic process; GO:0044270 cellular nitrogen compound catabolic process; GO:0000398 mRNA splicing, via spliceosome; GO:0008152 metabolic process; GO:0000377 RN…	GO:0005737 cytoplasm; GO:0005684 U2-type spliceosomal complex; GO:0032991 macromolecular complex; GO:0044424 intracellular part; GO:0005623 cell; GO:0044422 organelle part; GO:0031974 membrane-enclosed lumen; GO:0097526 spliceosomal tri-snRNP complex; GO:1902494 catalytic complex; GO:0005654 nucleoplasm; GO:1990726 Lsm1-7-Pat1 complex; GO:0070013 intracellular organelle lumen; GO:0044464 cell par…	GO:0097159 organic cyclic compound binding; GO:1901363 heterocyclic compound binding; GO:0003723 RNA binding; GO:0017070 U6 snRNA binding; GO:0005488 binding; GO:0003676 nucleic acid binding; GO:0005515 protein binding; GO:0017069 snRNA binding;	K12626	LSM7; U6 snRNA-associated Sm-like protein LSm7	hsa03018 RNA degradation - Homo sapiens (human); hsa03040 Spliceosome - Homo sapiens (human);	IPR001163; IPR010920;	LSM domain, eukaryotic/archaea-type; LSM domain;	A	KOG1781	Small Nuclear ribonucleoprotein splicing factor
Q96RT6	cTAGE family member 2 OS=Homo sapiens OX=9606 GN=CTAGE1 PE=1 SV=2	CTAGE1	85.28	2.6	1.259	0.293	endoplasmic reticulum		GO:0031224 intrinsic component of membrane; GO:0016020 membrane; GO:0016021 integral component of membrane; GO:0044425 membrane part;
Q16181	Septin-7 OS=Homo sapiens OX=9606 GN=SEPT7 PE=1 SV=2	SEPT7	50.679	52.6	0.711	0.0097979	cytoplasm	GO:0044085 cellular component biogenesis; GO:0065008 regulation of biological quality; GO:0060491 regulation of cell projection assembly; GO:0022414 reproductive process; GO:0048869 cellular developmental process; GO:0007067 mitotic nuclear division; GO:0060271 cilium assembly; GO:0044699 single-organism process; GO:1902115 regulation of organelle assembly; GO:0044782 cilium organization; GO:0051…	GO:0044421 extracellular region part; GO:0099568 cytoplasmic region; GO:0005737 cytoplasm; GO:0032991 macromolecular complex; GO:0097729 9+2 motile cilium; GO:0005623 cell; GO:0032155 cell division site part; GO:0044422 organelle part; GO:0043228 non-membrane-bounded organelle; GO:0070062 extracellular exosome; GO:0000793 condensed chromosome; GO:0005622 intracellular; GO:0043227 membrane-bounded…	GO:1901265 nucleoside phosphate binding; GO:0001882 nucleoside binding; GO:0043167 ion binding; GO:0005515 protein binding; GO:0000166 nucleotide binding; GO:0097159 organic cyclic compound binding; GO:1901363 heterocyclic compound binding; GO:0050839 cell adhesion molecule binding; GO:0032549 ribonucleoside binding; GO:0097367 carbohydrate derivative binding; GO:0042802 identical protein binding…	K16944	SEPT7, CDC3; septin 7		IPR027417; IPR030379;	P-loop containing nucleoside triphosphate hydrolase; Septin-type guanine nucleotide-binding (G) domain;	DZU	KOG2655	Septin family protein (P-loop GTPase)
Q13144	Translation initiation factor eIF-2B subunit epsilon OS=Homo sapiens OX=9606 GN=EIF2B5 PE=1 SV=3	EIF2B5	80.379	8.6	1.361	0.45958	nucleus	GO:0010941 regulation of cell death; GO:0006518 peptide metabolic process; GO:0032270 positive regulation of cellular protein metabolic process; GO:0021766 hippocampus development; GO:0022414 reproductive process; GO:0007272 ensheathment of neurons; GO:0010608 posttranscriptional regulation of gene expression; GO:0007420 brain development; GO:0009891 positive regulation of biosynthetic process; G…	GO:0043229 intracellular organelle; GO:0005737 cytoplasm; GO:0032991 macromolecular complex; GO:0044424 intracellular part; GO:0005623 cell; GO:0005829 cytosol; GO:0043231 intracellular membrane-bounded organelle; GO:0043226 organelle; GO:0005634 nucleus; GO:0005622 intracellular; GO:0044464 cell part; GO:0043227 membrane-bounded organelle; GO:0005851 eukaryotic translation initiation factor 2B c…	GO:0097159 organic cyclic compound binding; GO:1901363 heterocyclic compound binding; GO:0003723 RNA binding; GO:0008135 translation factor activity, RNA binding; GO:0005085 guanyl-nucleotide exchange factor activity; GO:0031369 translation initiation factor binding; GO:0005488 binding; GO:0003676 nucleic acid binding; GO:0003743 translation initiation factor activity; GO:0005515 protein binding;…	K03240	EIF2B5; translation initiation factor eIF-2B subunit epsilon	hsa03013 RNA transport - Homo sapiens (human); hsa05168 Herpes simplex virus 1 infection - Homo sapiens (human);	IPR003307; IPR011004; IPR016024; IPR029044; IPR016021;	W2 domain; Trimeric LpxA-like; Armadillo-type fold; Nucleotide-diphospho-sugar transferases; MIF4G-like domain;	J	KOG1461	Translation initiation factor 2B, epsilon subunit (eIF-2Bepsilon/GCD6)
O43583	Density-regulated protein OS=Homo sapiens OX=9606 GN=DENR PE=1 SV=2	DENR	22.092	31.8	0.536	0.0133609	cytoplasm	GO:0044085 cellular component biogenesis; GO:0016043 cellular component organization; GO:0022613 ribonucleoprotein complex biogenesis; GO:0006518 peptide metabolic process; GO:0022618 ribonucleoprotein complex assembly; GO:0044267 cellular protein metabolic process; GO:0044699 single-organism process; GO:1903008 organelle disassembly; GO:0002188 translation reinitiation; GO:0009058 biosynthetic p…	GO:0070992 translation initiation complex; GO:0044464 cell part; GO:0005622 intracellular; GO:0005737 cytoplasm; GO:0032991 macromolecular complex; GO:0044424 intracellular part; GO:1990904 ribonucleoprotein complex; GO:0005623 cell; GO:0030529 intracellular ribonucleoprotein complex; GO:0044444 cytoplasmic part;	GO:0097159 organic cyclic compound binding; GO:1901363 heterocyclic compound binding; GO:0043022 ribosome binding; GO:0008135 translation factor activity, RNA binding; GO:0003729 mRNA binding; GO:0003723 RNA binding; GO:0005488 binding; GO:0003676 nucleic acid binding; GO:0044877 macromolecular complex binding; GO:0003743 translation initiation factor activity; GO:0005515 protein binding; GO:0043…				IPR001950;	SUI1 domain;	R	KOG3239	Density-regulated protein related to translation initiation factor 1 (eIF-1/SUI1)
P0CG08	Golgi pH regulator B OS=Homo sapiens OX=9606 GN=GPR89B PE=1 SV=1	GPR89B	52.916	7.9	1.287	0.092161	plasma membrane	GO:0065008 regulation of biological quality; GO:0006885 regulation of pH; GO:0045851 pH reduction; GO:0044070 regulation of anion transport; GO:0030003 cellular cation homeostasis; GO:0030641 regulation of cellular pH; GO:0030004 cellular monovalent inorganic cation homeostasis; GO:0044699 single-organism process; GO:0015031 protein transport; GO:0055082 cellular chemical homeostasis; GO:0051234 …	GO:0043229 intracellular organelle; GO:0016020 membrane; GO:0032580 Golgi cisterna membrane; GO:0098588 bounding membrane of organelle; GO:0031090 organelle membrane; GO:0005737 cytoplasm; GO:0044446 intracellular organelle part; GO:0000139 Golgi membrane; GO:0031224 intrinsic component of membrane; GO:0012505 endomembrane system; GO:0005795 Golgi stack; GO:0044424 intracellular part; GO:0005623 …	GO:0015075 ion transmembrane transporter activity; GO:0022803 passive transmembrane transporter activity; GO:0005253 anion channel activity; GO:0022892 substrate-specific transporter activity; GO:0015267 channel activity; GO:0022891 substrate-specific transmembrane transporter activity; GO:0005244 voltage-gated ion channel activity; GO:0008308 voltage-gated anion channel activity; GO:0022838 subs…	K22193	GPR89, GPHR; golgi pH regulator		IPR022535; IPR025969;	Golgi pH regulator, conserved domain; Abscisic acid G-protein coupled receptor-like domain;	T	KOG2417	Predicted G-protein coupled receptor
Q96J84	Kin of IRRE-like protein 1 OS=Homo sapiens OX=9606 GN=KIRREL1 PE=1 SV=2	KIRREL1	83.535	7.5	2.416	0.0187594	extracellular	GO:0030833 regulation of actin filament polymerization; GO:0065008 regulation of biological quality; GO:0032273 positive regulation of protein polymerization; GO:0044699 single-organism process; GO:0030832 regulation of actin filament length; GO:0031400 negative regulation of protein modification process; GO:0051130 positive regulation of cellular component organization; GO:0022610 biological adh…	GO:0030425 dendrite; GO:0016020 membrane; GO:0044421 extracellular region part; GO:0030054 cell junction; GO:0098857 membrane microdomain; GO:0071944 cell periphery; GO:0005737 cytoplasm; GO:0031982 vesicle; GO:0031224 intrinsic component of membrane; GO:0044424 intracellular part; GO:0005911 cell-cell junction; GO:0005623 cell; GO:0070062 extracellular exosome; GO:0098590 plasma membrane region;…	GO:0005515 protein binding; GO:0008092 cytoskeletal protein binding; GO:0017022 myosin binding; GO:0005488 binding;				IPR003598; IPR007110; IPR013783; IPR013162; IPR003599; IPR013098;	Immunoglobulin subtype 2; Immunoglobulin-like domain; Immunoglobulin-like fold; CD80-like, immunoglobulin C2-set; Immunoglobulin subtype; Immunoglobulin I-set;	T	KOG3510	FOG: Immunoglobulin C-2 Type/fibronectin type III domains
O00764	Pyridoxal kinase OS=Homo sapiens OX=9606 GN=PDXK PE=1 SV=1	PDXK	35.102	17.6	0.953	0.58604	cytoplasm	GO:0051188 cofactor biosynthetic process; GO:0045321 leukocyte activation; GO:0042822 pyridoxal phosphate metabolic process; GO:0044699 single-organism process; GO:0009058 biosynthetic process; GO:0044237 cellular metabolic process; GO:0072524 pyridine-containing compound metabolic process; GO:0006796 phosphate-containing compound metabolic process; GO:0051234 establishment of localization; GO:00…	GO:0034774 secretory granule lumen; GO:0044421 extracellular region part; GO:0031410 cytoplasmic vesicle; GO:0031982 vesicle; GO:0005737 cytoplasm; GO:0044433 cytoplasmic vesicle part; GO:0044424 intracellular part; GO:0005623 cell; GO:0044422 organelle part; GO:0070062 extracellular exosome; GO:0031974 membrane-enclosed lumen; GO:0031983 vesicle lumen; GO:0070013 intracellular organelle lumen; G…	GO:0008478 pyridoxal kinase activity; GO:1901265 nucleoside phosphate binding; GO:0016773 phosphotransferase activity, alcohol group as acceptor; GO:0031402 sodium ion binding; GO:0046983 protein dimerization activity; GO:0030955 potassium ion binding; GO:0005515 protein binding; GO:0030170 pyridoxal phosphate binding; GO:1901363 heterocyclic compound binding; GO:0097159 organic cyclic compound b…	K00868	pdxK, pdxY; pyridoxine kinase [EC:2.7.1.35]	hsa00750 Vitamin B6 metabolism - Homo sapiens (human); hsa01100 Metabolic pathways - Homo sapiens (human);	IPR013749; IPR029056;	Pyridoxamine kinase/Phosphomethylpyrimidine kinase; Ribokinase-like;	H	KOG2599	Pyridoxal/pyridoxine/pyridoxamine kinase
Q6L8Q7	2',5'-phosphodiesterase 12 OS=Homo sapiens OX=9606 GN=PDE12 PE=1 SV=2	PDE12	67.351	7.7	1.404	0.027462	mitochondria	GO:0006396 RNA processing; GO:0006725 cellular aromatic compound metabolic process; GO:1901360 organic cyclic compound metabolic process; GO:0006807 nitrogen compound metabolic process; GO:0090503 RNA phosphodiester bond hydrolysis, exonucleolytic; GO:0044238 primary metabolic process; GO:0044237 cellular metabolic process; GO:0071704 organic substance metabolic process; GO:0006397 mRNA processin…	GO:0005759 mitochondrial matrix; GO:0043229 intracellular organelle; GO:0044429 mitochondrial part; GO:0005737 cytoplasm; GO:0044446 intracellular organelle part; GO:0044424 intracellular part; GO:0005623 cell; GO:0005739 mitochondrion; GO:0044422 organelle part; GO:0031974 membrane-enclosed lumen; GO:0043226 organelle; GO:0043231 intracellular membrane-bounded organelle; GO:0070013 intracellular…	GO:0000175 3'-5'-exoribonuclease activity; GO:0043167 ion binding; GO:0016896 exoribonuclease activity, producing 5'-phosphomonoesters; GO:0008408 3'-5' exonuclease activity; GO:0016787 hydrolase activity; GO:0016796 exonuclease activity, active with either ribo- or deoxyribonucleic acids and producing 5'-phosphomonoesters; GO:0004535 poly(A)-specific ribonuclease activity; GO:0003824 catalytic a…	K19612	PDE12; 2',5'-phosphodiesterase [EC:3.1.13.4 3.1.4.-]		IPR005135;	Endonuclease/exonuclease/phosphatase;	K	KOG0620	Glucose-repressible alcohol dehydrogenase transcriptional effector CCR4 and related proteins
A5YM69	Rho guanine nucleotide exchange factor 35 OS=Homo sapiens OX=9606 GN=ARHGEF35 PE=1 SV=1	ARHGEF35	53.286	2.9			nucleus							IPR029212;	Rho guanine nucleotide exchange factor 5/35, N-terminal;	T	KOG3523	Putative guanine nucleotide exchange factor TIM
Q9Y5Y2	Cytosolic Fe-S cluster assembly factor NUBP2 OS=Homo sapiens OX=9606 GN=NUBP2 PE=1 SV=1	NUBP2	28.825	24.4	1.887	0.0087447	mitochondria	GO:0006790 sulfur compound metabolic process; GO:0044085 cellular component biogenesis; GO:0051188 cofactor biosynthetic process; GO:0016043 cellular component organization; GO:0044763 single-organism cellular process; GO:0044699 single-organism process; GO:0009058 biosynthetic process; GO:0044237 cellular metabolic process; GO:0044249 cellular biosynthetic process; GO:0051186 cofactor metabolic …	GO:0043229 intracellular organelle; GO:0005929 cilium; GO:0000922 spindle pole; GO:0042995 cell projection; GO:0044450 microtubule organizing center part; GO:0043232 intracellular non-membrane-bounded organelle; GO:0044430 cytoskeletal part; GO:0005737 cytoplasm; GO:0044446 intracellular organelle part; GO:0044424 intracellular part; GO:0005623 cell; GO:0005819 spindle; GO:0044422 organelle part;…	GO:0005524 ATP binding; GO:1901265 nucleoside phosphate binding; GO:0001882 nucleoside binding; GO:0043167 ion binding; GO:0005515 protein binding; GO:0000166 nucleotide binding; GO:0051539 4 iron, 4 sulfur cluster binding; GO:0097159 organic cyclic compound binding; GO:1901363 heterocyclic compound binding; GO:0032549 ribonucleoside binding; GO:0097367 carbohydrate derivative binding; GO:0032553…				IPR027417;	P-loop containing nucleoside triphosphate hydrolase;
Q86XA9	HEAT repeat-containing protein 5A OS=Homo sapiens OX=9606 GN=HEATR5A PE=1 SV=2	HEATR5A	222	1			plasma membrane			GO:0005488 binding;				IPR011989; IPR016024;	Armadillo-like helical; Armadillo-type fold;	S	KOG1822	Uncharacterized conserved protein
P00403	Cytochrome c oxidase subunit 2 OS=Homo sapiens OX=9606 GN=MT-CO2 PE=1 SV=1	MT-CO2	25.565	26.4	0.883	0.075638	plasma membrane	GO:0009116 nucleoside metabolic process; GO:0042278 purine nucleoside metabolic process; GO:0065008 regulation of biological quality; GO:0006123 mitochondrial electron transport, cytochrome c to oxygen; GO:0048732 gland development; GO:0009167 purine ribonucleoside monophosphate metabolic process; GO:0009117 nucleotide metabolic process; GO:0044699 single-organism process; GO:0044237 cellular met…	GO:0016020 membrane; GO:0044421 extracellular region part; GO:0098800 inner mitochondrial membrane protein complex; GO:0031090 organelle membrane; GO:0098796 membrane protein complex; GO:0031982 vesicle; GO:0005737 cytoplasm; GO:0032991 macromolecular complex; GO:0031224 intrinsic component of membrane; GO:0098798 mitochondrial protein complex; GO:0044424 intracellular part; GO:0044455 mitochondr…	GO:0015075 ion transmembrane transporter activity; GO:0043167 ion binding; GO:0022892 substrate-specific transporter activity; GO:0015077 monovalent inorganic cation transmembrane transporter activity; GO:0005515 protein binding; GO:0016676 oxidoreductase activity, acting on a heme group of donors, oxygen as acceptor; GO:0005507 copper ion binding; GO:0016675 oxidoreductase activity, acting on a …	K02261	COX2; cytochrome c oxidase subunit 2	hsa00190 Oxidative phosphorylation - Homo sapiens (human); hsa01100 Metabolic pathways - Homo sapiens (human); hsa04260 Cardiac muscle contraction - Homo sapiens (human); hsa04714 Thermogenesis - Homo sapiens (human); hsa04932 Non-alcoholic fatty liver disease (NAFLD) - Homo sapiens (human); hsa05010 Alzheimer disease - Homo sapiens (human); hsa05012 Parkinson disease - Homo sapiens (human); hsa0…	IPR034210; IPR002429; IPR008972; IPR014222; IPR011759;	Cytochrome c oxidase subunit 2, C-terminal; Cytochrome c oxidase subunit II-like C-terminal; Cupredoxin; Cytochrome c oxidase, subunit II; Cytochrome C oxidase subunit II, transmembrane domain;	C	KOG4767	Cytochrome c oxidase, subunit II, and related proteins
O75533	Splicing factor 3B subunit 1 OS=Homo sapiens OX=9606 GN=SF3B1 PE=1 SV=3	SF3B1	145.83	35.1	0.985	0.49044	plasma membrane	GO:0044085 cellular component biogenesis; GO:0016043 cellular component organization; GO:0022613 ribonucleoprotein complex biogenesis; GO:0022618 ribonucleoprotein complex assembly; GO:0006725 cellular aromatic compound metabolic process; GO:0060255 regulation of macromolecule metabolic process; GO:0044237 cellular metabolic process; GO:0071704 organic substance metabolic process; GO:0000398 mRNA…	GO:0005686 U2 snRNP; GO:0005684 U2-type spliceosomal complex; GO:0032991 macromolecular complex; GO:0044424 intracellular part; GO:0016604 nuclear body; GO:0005623 cell; GO:0044422 organelle part; GO:0031974 membrane-enclosed lumen; GO:1902494 catalytic complex; GO:0005654 nucleoplasm; GO:0070013 intracellular organelle lumen; GO:0016607 nuclear speck; GO:0044464 cell part; GO:0005622 intracellul…	GO:0097159 organic cyclic compound binding; GO:1901363 heterocyclic compound binding; GO:0003729 mRNA binding; GO:0003723 RNA binding; GO:0005488 binding; GO:0003676 nucleic acid binding; GO:0005515 protein binding;	K12828	SF3B1, SAP155; splicing factor 3B subunit 1	hsa03040 Spliceosome - Homo sapiens (human);	IPR011989; IPR015016; IPR016024;	Armadillo-like helical; Splicing factor 3B subunit 1; Armadillo-type fold;	A	KOG0213	Splicing factor 3b, subunit 1
Q969Q0	60S ribosomal protein L36a-like OS=Homo sapiens OX=9606 GN=RPL36AL PE=1 SV=3	RPL36AL	12.469	26.4	0.463	0.068858	extracellular	GO:0006518 peptide metabolic process; GO:0043043 peptide biosynthetic process; GO:0044267 cellular protein metabolic process; GO:0006807 nitrogen compound metabolic process; GO:0009058 biosynthetic process; GO:0043603 cellular amide metabolic process; GO:0044238 primary metabolic process; GO:1901566 organonitrogen compound biosynthetic process; GO:1901576 organic substance biosynthetic process; G…	GO:0016020 membrane; GO:0005840 ribosome; GO:0043229 intracellular organelle; GO:0043232 intracellular non-membrane-bounded organelle; GO:0071944 cell periphery; GO:0022625 cytosolic large ribosomal subunit; GO:0044446 intracellular organelle part; GO:0005737 cytoplasm; GO:0032991 macromolecular complex; GO:0044424 intracellular part; GO:0005829 cytosol; GO:0005623 cell; GO:0044422 organelle part…	GO:0005515 protein binding; GO:0003735 structural constituent of ribosome; GO:0005198 structural molecule activity; GO:0005488 binding;	K02929	RP-L44e, RPL44; large subunit ribosomal protein L44e	hsa03010 Ribosome - Homo sapiens (human);	IPR011332;	Zinc-binding ribosomal protein;	J	KOG3464	60S ribosomal protein L44
Q63HN8	E3 ubiquitin-protein ligase RNF213 OS=Homo sapiens OX=9606 GN=RNF213 PE=1 SV=3	RNF213	591.4	5.5	1.333	5.7621e-07	plasma membrane	GO:0044085 cellular component biogenesis; GO:0009968 negative regulation of signal transduction; GO:0001568 blood vessel development; GO:0023051 regulation of signaling; GO:0044699 single-organism process; GO:2000050 regulation of non-canonical Wnt signaling pathway; GO:0051865 protein autoubiquitination; GO:0044237 cellular metabolic process; GO:0001525 angiogenesis; GO:0008152 metabolic process…	GO:0043229 intracellular organelle; GO:0016020 membrane; GO:0043232 intracellular non-membrane-bounded organelle; GO:0044446 intracellular organelle part; GO:0005737 cytoplasm; GO:0031981 nuclear lumen; GO:0044424 intracellular part; GO:0005730 nucleolus; GO:0005829 cytosol; GO:0005623 cell; GO:0044422 organelle part; GO:0043228 non-membrane-bounded organelle; GO:0031974 membrane-enclosed lumen; …	GO:0019787 ubiquitin-like protein transferase activity; GO:0043167 ion binding; GO:0016817 hydrolase activity, acting on acid anhydrides; GO:0016787 hydrolase activity; GO:0005515 protein binding; GO:0017111 nucleoside-triphosphatase activity; GO:0008270 zinc ion binding; GO:0016887 ATPase activity; GO:0016462 pyrophosphatase activity; GO:0046914 transition metal ion binding; GO:0003824 catalytic…	K22754			IPR003593; IPR001841; IPR013083; IPR018957; IPR027417;	AAA+ ATPase domain; Zinc finger, RING-type; Zinc finger, RING/FYVE/PHD-type; Zinc finger, C3HC4 RING-type; P-loop containing nucleoside triphosphate hydrolase;
P84157	Matrix-remodeling-associated protein 7 OS=Homo sapiens OX=9606 GN=MXRA7 PE=1 SV=1	MXRA7	21.466	24.5	0.74	0.00156491	extracellular		GO:0031224 intrinsic component of membrane; GO:0016020 membrane; GO:0016021 integral component of membrane; GO:0044425 membrane part;
P23743	Diacylglycerol kinase alpha OS=Homo sapiens OX=9606 GN=DGKA PE=1 SV=3	DGKA	82.629	11.6	1.054	0.26606	cytoplasm	GO:0050794 regulation of cellular process; GO:0044700 single organism signaling; GO:0044707 single-multicellular organism process; GO:0007205 protein kinase C-activating G-protein coupled receptor signaling pathway; GO:0016310 phosphorylation; GO:0065008 regulation of biological quality; GO:0007596 blood coagulation; GO:0046486 glycerolipid metabolic process; GO:0006654 phosphatidic acid biosynth…	GO:0016020 membrane; GO:0071944 cell periphery; GO:0044464 cell part; GO:0005622 intracellular; GO:0005737 cytoplasm; GO:0044424 intracellular part; GO:0005829 cytosol; GO:0005623 cell; GO:0005886 plasma membrane; GO:0044444 cytoplasmic part;	GO:1901265 nucleoside phosphate binding; GO:0016773 phosphotransferase activity, alcohol group as acceptor; GO:0097159 organic cyclic compound binding; GO:1901363 heterocyclic compound binding; GO:0016301 kinase activity; GO:0003824 catalytic activity; GO:0032553 ribonucleotide binding; GO:0005488 binding; GO:0032550 purine ribonucleoside binding; GO:0008289 lipid binding; GO:0043169 cation bindi…	K00901	dgkA, DGK; diacylglycerol kinase (ATP) [EC:2.7.1.107]	hsa00561 Glycerolipid metabolism - Homo sapiens (human); hsa00564 Glycerophospholipid metabolism - Homo sapiens (human); hsa01100 Metabolic pathways - Homo sapiens (human); hsa04070 Phosphatidylinositol signaling system - Homo sapiens (human); hsa04072 Phospholipase D signaling pathway - Homo sapiens (human); hsa05231 Choline metabolism in cancer - Homo sapiens (human);	IPR029477; IPR001206; IPR002219; IPR000756; IPR016064; IPR002048; IPR011992;	Diacylglycerol kinase type I, N-terminal; Diacylglycerol kinase, catalytic domain; Protein kinase C-like, phorbol ester/diacylglycerol-binding domain; Diacylglycerol kinase, accessory domain; NAD kinase/diacylglycerol kinase-like domain; EF-hand domain; EF-hand domain pair;	IT	KOG1169	Diacylglycerol kinase
Q08426	Peroxisomal bifunctional enzyme OS=Homo sapiens OX=9606 GN=EHHADH PE=1 SV=3	EHHADH	79.494	3.3	1.574	0.029481	mitochondria	GO:0034440 lipid oxidation; GO:0044267 cellular protein metabolic process; GO:0044699 single-organism process; GO:0044255 cellular lipid metabolic process; GO:0044237 cellular metabolic process; GO:0071704 organic substance metabolic process; GO:0008152 metabolic process; GO:0030258 lipid modification; GO:0043543 protein acylation; GO:0032787 monocarboxylic acid metabolic process; GO:0044248 cell…	GO:0043229 intracellular organelle; GO:0044439 peroxisomal part; GO:0005777 peroxisome; GO:0044446 intracellular organelle part; GO:0005737 cytoplasm; GO:0044438 microbody part; GO:0044424 intracellular part; GO:0005829 cytosol; GO:0005623 cell; GO:0044422 organelle part; GO:0005739 mitochondrion; GO:0031974 membrane-enclosed lumen; GO:0043231 intracellular membrane-bounded organelle; GO:0043226 …	GO:0005102 receptor binding; GO:0016829 lyase activity; GO:0016836 hydro-lyase activity; GO:0005515 protein binding; GO:0004165 dodecenoyl-CoA delta-isomerase activity; GO:0016835 carbon-oxygen lyase activity; GO:0004300 enoyl-CoA hydratase activity; GO:0016491 oxidoreductase activity; GO:0016614 oxidoreductase activity, acting on CH-OH group of donors; GO:0016616 oxidoreductase activity, acting …	K07514	EHHADH; enoyl-CoA hydratase / 3-hydroxyacyl-CoA dehydrogenase / 3,2-trans-enoyl-CoA isomerase [EC:4.2.1.17 1.1.1.35 5.3.3.8]	hsa00071 Fatty acid degradation - Homo sapiens (human); hsa00280 Valine, leucine and isoleucine degradation - Homo sapiens (human); hsa00310 Lysine degradation - Homo sapiens (human); hsa00380 Tryptophan metabolism - Homo sapiens (human); hsa00410 beta-Alanine metabolism - Homo sapiens (human); hsa00640 Propanoate metabolism - Homo sapiens (human); hsa00650 Butanoate metabolism - Homo sapiens (hu…	IPR029045; IPR013328; IPR008927; IPR016040; IPR006176; IPR006108;	ClpP/crotonase-like domain; 6-phosphogluconate dehydrogenase, domain 2; 6-phosphogluconate dehydrogenase C-terminal domain-like; NAD(P)-binding domain; 3-hydroxyacyl-CoA dehydrogenase, NAD binding; 3-hydroxyacyl-CoA dehydrogenase, C-terminal;	I	KOG1683	Hydroxyacyl-CoA dehydrogenase/enoyl-CoA hydratase
P00441	Superoxide dismutase [Cu-Zn] OS=Homo sapiens OX=9606 GN=SOD1 PE=1 SV=2	SOD1	15.936	40.3	0.591	0.0173766	cytoplasm	GO:0044700 single organism signaling; GO:0002694 regulation of leukocyte activation; GO:0010941 regulation of cell death; GO:0048732 gland development; GO:0007272 ensheathment of neurons; GO:0022414 reproductive process; GO:0097332 response to antipsychotic drug; GO:0043523 regulation of neuron apoptotic process; GO:0046683 response to organophosphorus; GO:0044237 cellular metabolic process; GO:0…	GO:0030425 dendrite; GO:0044421 extracellular region part; GO:0099568 cytoplasmic region; GO:0005737 cytoplasm; GO:0032838 cell projection cytoplasm; GO:0043025 neuronal cell body; GO:0032991 macromolecular complex; GO:0005623 cell; GO:0044422 organelle part; GO:0070062 extracellular exosome; GO:0005654 nucleoplasm; GO:0032839 dendrite cytoplasm; GO:0043209 myelin sheath; GO:0005622 intracellular…	GO:0004784 superoxide dismutase activity; GO:0031267 small GTPase binding; GO:0017048 Rho GTPase binding; GO:0048365 Rac GTPase binding; GO:0019903 protein phosphatase binding; GO:0016721 oxidoreductase activity, acting on superoxide radicals as acceptor; GO:0051087 chaperone binding; GO:0043167 ion binding; GO:0046983 protein dimerization activity; GO:0016209 antioxidant activity; GO:0005515 pro…	K04565	SOD1; superoxide dismutase, Cu-Zn family [EC:1.15.1.1]	hsa04146 Peroxisome - Homo sapiens (human); hsa04213 Longevity regulating pathway - multiple species - Homo sapiens (human); hsa05014 Amyotrophic lateral sclerosis (ALS) - Homo sapiens (human); hsa05016 Huntington disease - Homo sapiens (human); hsa05020 Prion diseases - Homo sapiens (human);	IPR001424;	Superoxide dismutase, copper/zinc binding domain;	P	KOG0441	Cu2+/Zn2+ superoxide dismutase SOD1
Q96LL9	DnaJ homolog subfamily C member 30, mitochondrial OS=Homo sapiens OX=9606 GN=DNAJC30 PE=1 SV=3	DNAJC30	25.961	12.8	1.337	0.57214	mitochondria		GO:0043226 organelle; GO:0043231 intracellular membrane-bounded organelle; GO:0043229 intracellular organelle; GO:0044464 cell part; GO:0005622 intracellular; GO:0005737 cytoplasm; GO:0044424 intracellular part; GO:0043227 membrane-bounded organelle; GO:0005829 cytosol; GO:0005623 cell; GO:0005739 mitochondrion; GO:0044444 cytoplasmic part;		K19374	DNAJC30; DnaJ homolog subfamily C member 30		IPR001623;	DnaJ domain;
O95297	Myelin protein zero-like protein 1 OS=Homo sapiens OX=9606 GN=MPZL1 PE=1 SV=1	MPZL1	29.082	16.7	1.001	0.93616	plasma membrane	GO:0050794 regulation of cellular process; GO:0044700 single organism signaling; GO:0051716 cellular response to stimulus; GO:0007166 cell surface receptor signaling pathway; GO:0044763 single-organism cellular process; GO:0007169 transmembrane receptor protein tyrosine kinase signaling pathway; GO:0044699 single-organism process; GO:0023052 signaling; GO:0050896 response to stimulus; GO:0007165 …	GO:0016020 membrane; GO:0031226 intrinsic component of plasma membrane; GO:0071944 cell periphery; GO:0030054 cell junction; GO:0070161 anchoring junction; GO:0031224 intrinsic component of membrane; GO:0005887 integral component of plasma membrane; GO:0005623 cell; GO:0016021 integral component of membrane; GO:0005886 plasma membrane; GO:0005925 focal adhesion; GO:0044459 plasma membrane part; G…	GO:0005515 protein binding; GO:0005198 structural molecule activity; GO:0005488 binding;	K06770	MPZ; myelin protein zero	hsa04514 Cell adhesion molecules (CAMs) - Homo sapiens (human);	IPR007110; IPR013783; IPR003599; IPR013106;	Immunoglobulin-like domain; Immunoglobulin-like fold; Immunoglobulin subtype; Immunoglobulin V-set domain;
Q9C0H2	Protein tweety homolog 3 OS=Homo sapiens OX=9606 GN=TTYH3 PE=1 SV=3	TTYH3	57.544	3.4	1.557	0.0035011	plasma membrane	GO:0098661 inorganic anion transmembrane transport; GO:0006820 anion transport; GO:0006810 transport; GO:0055085 transmembrane transport; GO:0034220 ion transmembrane transport; GO:0098660 inorganic ion transmembrane transport; GO:0006811 ion transport; GO:0006821 chloride transport; GO:0051179 localization; GO:0098656 anion transmembrane transport; GO:0015698 inorganic anion transport; GO:190247…	GO:0016020 membrane; GO:0044421 extracellular region part; GO:0071944 cell periphery; GO:0031982 vesicle; GO:0031224 intrinsic component of membrane; GO:0032991 macromolecular complex; GO:0005623 cell; GO:1902495 transmembrane transporter complex; GO:0016021 integral component of membrane; GO:0005576 extracellular region; GO:0005886 plasma membrane; GO:0043226 organelle; GO:0070062 extracellular …	GO:0022839 ion gated channel activity; GO:0015075 ion transmembrane transporter activity; GO:0022803 passive transmembrane transporter activity; GO:0061778 intracellular chloride channel activity; GO:0005253 anion channel activity; GO:0022892 substrate-specific transporter activity; GO:0005254 chloride channel activity; GO:0015267 channel activity; GO:0015103 inorganic anion transmembrane transpo…	K22641					R	KOG4433	Tweety transmembrane/cell surface protein
O60925	Prefoldin subunit 1 OS=Homo sapiens OX=9606 GN=PFDN1 PE=1 SV=2	PFDN1	14.21	30.3	1.055	0.4814	cytoplasm	GO:0050794 regulation of cellular process; GO:0010468 regulation of gene expression; GO:0006355 regulation of transcription, DNA-templated; GO:0031326 regulation of cellular biosynthetic process; GO:0080090 regulation of primary metabolic process; GO:0060255 regulation of macromolecule metabolic process; GO:0019219 regulation of nucleobase-containing compound metabolic process; GO:0044763 single-…	GO:0016272 prefoldin complex; GO:0032991 macromolecular complex; GO:0043234 protein complex;	GO:0005515 protein binding; GO:0051082 unfolded protein binding; GO:0003700 transcription factor activity, sequence-specific DNA binding; GO:0044183 protein binding involved in protein folding; GO:0005488 binding; GO:0001071 nucleic acid binding transcription factor activity;	K09548	PFDN1; prefoldin subunit 1
Q9UII2	ATPase inhibitor, mitochondrial OS=Homo sapiens OX=9606 GN=ATP5IF1 PE=1 SV=1	ATP5IF1	12.249	24.5	0.42	0.0032555	mitochondria	GO:0044085 cellular component biogenesis; GO:0010941 regulation of cell death; GO:0065008 regulation of biological quality; GO:0032270 positive regulation of cellular protein metabolic process; GO:0002262 myeloid cell homeostasis; GO:1903533 regulation of protein targeting; GO:0010821 regulation of mitochondrion organization; GO:0044237 cellular metabolic process; GO:0008285 negative regulation o…	GO:0043226 organelle; GO:0043231 intracellular membrane-bounded organelle; GO:0043229 intracellular organelle; GO:0044464 cell part; GO:0005622 intracellular; GO:0005737 cytoplasm; GO:0009986 cell surface; GO:0044424 intracellular part; GO:0043227 membrane-bounded organelle; GO:0005623 cell; GO:0005739 mitochondrion; GO:0044444 cytoplasmic part;	GO:0042030 ATPase inhibitor activity; GO:0042802 identical protein binding; GO:0043532 angiostatin binding; GO:0030234 enzyme regulator activity; GO:0051117 ATPase binding; GO:0042803 protein homodimerization activity; GO:0005488 binding; GO:0060589 nucleoside-triphosphatase regulator activity; GO:0046983 protein dimerization activity; GO:0005515 protein binding; GO:0060590 ATPase regulator activ…	K22255	ATPIF1; ATPase inhibitor, mitochondrial
O75306	NADH dehydrogenase [ubiquinone] iron-sulfur protein 2, mitochondrial OS=Homo sapiens OX=9606 GN=NDUFS2 PE=1 SV=2	NDUFS2	52.545	15.6	1.061	0.78476	mitochondria	GO:0044085 cellular component biogenesis; GO:0009116 nucleoside metabolic process; GO:0042278 purine nucleoside metabolic process; GO:0009167 purine ribonucleoside monophosphate metabolic process; GO:0009117 nucleotide metabolic process; GO:0044699 single-organism process; GO:0044237 cellular metabolic process; GO:0006796 phosphate-containing compound metabolic process; GO:0008152 metabolic proce…	GO:0016020 membrane; GO:0098800 inner mitochondrial membrane protein complex; GO:0031090 organelle membrane; GO:0098796 membrane protein complex; GO:0005737 cytoplasm; GO:0045271 respiratory chain complex I; GO:0032991 macromolecular complex; GO:0098798 mitochondrial protein complex; GO:0044424 intracellular part; GO:0005747 mitochondrial respiratory chain complex I; GO:0044455 mitochondrial memb…	GO:0016651 oxidoreductase activity, acting on NAD(P)H; GO:1901265 nucleoside phosphate binding; GO:0031625 ubiquitin protein ligase binding; GO:0043167 ion binding; GO:0050136 NADH dehydrogenase (quinone) activity; GO:0005515 protein binding; GO:0000166 nucleotide binding; GO:0051539 4 iron, 4 sulfur cluster binding; GO:0048037 cofactor binding; GO:0016655 oxidoreductase activity, acting on NAD(P…	K03935	NDUFS2; NADH dehydrogenase (ubiquinone) Fe-S protein 2 [EC:1.6.5.3 1.6.99.3]	hsa00190 Oxidative phosphorylation - Homo sapiens (human); hsa01100 Metabolic pathways - Homo sapiens (human); hsa04714 Thermogenesis - Homo sapiens (human); hsa04723 Retrograde endocannabinoid signaling - Homo sapiens (human); hsa04932 Non-alcoholic fatty liver disease (NAFLD) - Homo sapiens (human); hsa05010 Alzheimer disease - Homo sapiens (human); hsa05012 Parkinson disease - Homo sapiens (hu…	IPR029014; IPR001135;	NiFe hydrogenase-like; NADH-quinone oxidoreductase, subunit D;	C	KOG2870	NADH:ubiquinone oxidoreductase, NDUFS2/49 kDa subunit
Q9UIC8	Leucine carboxyl methyltransferase 1 OS=Homo sapiens OX=9606 GN=LCMT1 PE=1 SV=2	LCMT1	38.379	12.6	1.033	0.025636	cytoplasm	GO:0043687 post-translational protein modification; GO:0090266 regulation of mitotic cell cycle spindle assembly checkpoint; GO:0050794 regulation of cellular process; GO:0010941 regulation of cell death; GO:0007346 regulation of mitotic cell cycle; GO:0051129 negative regulation of cellular component organization; GO:0043067 regulation of programmed cell death; GO:0044267 cellular protein metabo…	GO:0044464 cell part; GO:0005622 intracellular; GO:0005737 cytoplasm; GO:0044424 intracellular part; GO:0005829 cytosol; GO:0005623 cell; GO:0044444 cytoplasmic part;	GO:0008757 S-adenosylmethionine-dependent methyltransferase activity; GO:0008168 methyltransferase activity; GO:0010340 carboxyl-O-methyltransferase activity; GO:0008276 protein methyltransferase activity; GO:0018423 protein C-terminal leucine carboxyl O-methyltransferase activity; GO:0003824 catalytic activity; GO:0005488 binding; GO:0051998 protein carboxyl O-methyltransferase activity; GO:0016…	K18203	LCMT1; [phosphatase 2A protein]-leucine-carboxy methyltransferase [EC:2.1.1.233]		IPR029063;	S-adenosyl-L-methionine-dependent methyltransferase;	O	KOG2918	Carboxymethyl transferase
Q9Y2H6	Fibronectin type-III domain-containing protein 3A OS=Homo sapiens OX=9606 GN=FNDC3A PE=1 SV=4	FNDC3A	131.85	9	1.121	0.131702	endoplasmic reticulum	GO:0000003 reproduction; GO:0044707 single-multicellular organism process; GO:0022414 reproductive process; GO:0008584 male gonad development; GO:0046661 male sex differentiation; GO:0048869 cellular developmental process; GO:0008406 gonad development; GO:0044699 single-organism process; GO:0048468 cell development; GO:0022610 biological adhesion; GO:0030154 cell differentiation; GO:0016337 singl…	GO:0097708 intracellular vesicle; GO:0043229 intracellular organelle; GO:0016020 membrane; GO:0098588 bounding membrane of organelle; GO:0031090 organelle membrane; GO:0031410 cytoplasmic vesicle; GO:0044446 intracellular organelle part; GO:0005737 cytoplasm; GO:0031982 vesicle; GO:0000139 Golgi membrane; GO:0031224 intrinsic component of membrane; GO:0012506 vesicle membrane; GO:0012505 endomemb…	GO:0097159 organic cyclic compound binding; GO:1901363 heterocyclic compound binding; GO:0003723 RNA binding; GO:0005515 protein binding; GO:0005488 binding; GO:0003676 nucleic acid binding;				IPR013783; IPR003961;	Immunoglobulin-like fold; Fibronectin type III;
Q9UNM6	26S proteasome non-ATPase regulatory subunit 13 OS=Homo sapiens OX=9606 GN=PSMD13 PE=1 SV=2	PSMD13	42.945	44.7	1.043	0.41406	cytoplasm	GO:0044700 single organism signaling; GO:0044085 cellular component biogenesis; GO:0022414 reproductive process; GO:0010608 posttranscriptional regulation of gene expression; GO:0051443 positive regulation of ubiquitin-protein transferase activity; GO:0031347 regulation of defense response; GO:0010564 regulation of cell cycle process; GO:0044237 cellular metabolic process; GO:1903364 positive reg…	GO:0016020 membrane; GO:0034774 secretory granule lumen; GO:0044421 extracellular region part; GO:0031410 cytoplasmic vesicle; GO:0005838 proteasome regulatory particle; GO:0031982 vesicle; GO:0005737 cytoplasm; GO:0044433 cytoplasmic vesicle part; GO:0032991 macromolecular complex; GO:0044424 intracellular part; GO:0005623 cell; GO:1904813 ficolin-1-rich granule lumen; GO:0044422 organelle part;…	GO:0005515 protein binding; GO:0005198 structural molecule activity; GO:0005488 binding;	K03039	PSMD13, RPN9; 26S proteasome regulatory subunit N9	hsa03050 Proteasome - Homo sapiens (human); hsa05169 Epstein-Barr virus infection - Homo sapiens (human);	IPR011991; IPR000717;	Winged helix-turn-helix DNA-binding domain; Proteasome component (PCI) domain;
P09874	Poly [ADP-ribose] polymerase 1 OS=Homo sapiens OX=9606 GN=PARP1 PE=1 SV=4	PARP1	113.08	24.6	0.837	0.0039829	nucleus	GO:0044085 cellular component biogenesis; GO:0044700 single organism signaling; GO:0010941 regulation of cell death; GO:0006266 DNA ligation; GO:0045980 negative regulation of nucleotide metabolic process; GO:0006289 nucleotide-excision repair; GO:1904645 response to beta-amyloid; GO:0043523 regulation of neuron apoptotic process; GO:0009891 positive regulation of biosynthetic process; GO:0014742…	GO:0016020 membrane; GO:0000784 nuclear chromosome, telomeric region; GO:0000781 chromosome, telomeric region; GO:0005737 cytoplasm; GO:0032991 macromolecular complex; GO:0044424 intracellular part; GO:0005623 cell; GO:0044422 organelle part; GO:0044427 chromosomal part; GO:0043228 non-membrane-bounded organelle; GO:0031974 membrane-enclosed lumen; GO:0005654 nucleoplasm; GO:0070013 intracellular…	GO:1901265 nucleoside phosphate binding; GO:0047485 protein N-terminus binding; GO:0003910 DNA ligase (ATP) activity; GO:0005102 receptor binding; GO:0019901 protein kinase binding; GO:0016874 ligase activity; GO:0005515 protein binding; GO:0051427 hormone receptor binding; GO:0003909 DNA ligase activity; GO:1901363 heterocyclic compound binding; GO:0097159 organic cyclic compound binding; GO:004…	K10798	PARP; poly [ADP-ribose] polymerase [EC:2.4.2.30]	hsa03410 Base excision repair - Homo sapiens (human); hsa04210 Apoptosis - Homo sapiens (human); hsa04217 Necroptosis - Homo sapiens (human);	IPR008893; IPR004102; IPR012982; IPR001510; IPR012317; IPR001357;	WGR domain; Poly(ADP-ribose) polymerase, regulatory domain; PADR1 domain; Zinc finger, PARP-type; Poly(ADP-ribose) polymerase, catalytic domain; BRCT domain;	KLO	KOG1037	NAD+ ADP-ribosyltransferase Parp, required for poly-ADP ribosylation of nuclear proteins
H7BZ55	Putative ciliary rootlet coiled-coil protein 2 OS=Homo sapiens OX=9606 GN=CROCC2 PE=5 SV=3	CROCC2	185.87	0.5	2.582	4.6576e-06	cytoplasm,nucleus
Q99832	T-complex protein 1 subunit eta OS=Homo sapiens OX=9606 GN=CCT7 PE=1 SV=2	CCT7	59.366	52.9	0.765	0.120856	cytoplasm	GO:0065008 regulation of biological quality; GO:0035036 sperm-egg recognition; GO:0022414 reproductive process; GO:0061077 chaperone-mediated protein folding; GO:0009891 positive regulation of biosynthetic process; GO:0044699 single-organism process; GO:1901998 toxin transport; GO:1904816 positive regulation of protein localization to chromosome, telomeric region; GO:0032204 regulation of telomer…	GO:0044421 extracellular region part; GO:0005874 microtubule; GO:0031982 vesicle; GO:0005737 cytoplasm; GO:0032991 macromolecular complex; GO:0099512 supramolecular fiber; GO:0044424 intracellular part; GO:0005623 cell; GO:0099080 supramolecular complex; GO:0044422 organelle part; GO:0002199 zona pellucida receptor complex; GO:0043228 non-membrane-bounded organelle; GO:0070062 extracellular exoso…	GO:0005524 ATP binding; GO:1901265 nucleoside phosphate binding; GO:0001882 nucleoside binding; GO:0043167 ion binding; GO:0005515 protein binding; GO:0000166 nucleotide binding; GO:0044183 protein binding involved in protein folding; GO:0097159 organic cyclic compound binding; GO:1901363 heterocyclic compound binding; GO:0032549 ribonucleoside binding; GO:0097367 carbohydrate derivative binding;…	K09499	CCT7; T-complex protein 1 subunit eta		IPR027410; IPR027409; IPR027413;	TCP-1-like chaperonin intermediate domain; GroEL-like apical domain; GroEL-like equatorial domain;	O	KOG0360	Chaperonin complex component, TCP-1 alpha subunit (CCT1)
P02452	Collagen alpha-1(I) chain OS=Homo sapiens OX=9606 GN=COL1A1 PE=1 SV=5	COL1A1	138.94	62	9.267	1.147e-07	extracellular	GO:0044700 single organism signaling; GO:0044085 cellular component biogenesis; GO:0030199 collagen fibril organization; GO:0043009 chordate embryonic development; GO:0009891 positive regulation of biosynthetic process; GO:0046683 response to organophosphorus; GO:0008152 metabolic process; GO:0065003 macromolecular complex assembly; GO:0060343 trabecula formation; GO:0090263 positive regulation o…	GO:0005584 collagen type I trimer; GO:0005783 endoplasmic reticulum; GO:0005615 extracellular space; GO:0098643 banded collagen fibril; GO:0044421 extracellular region part; GO:0031410 cytoplasmic vesicle; GO:0031982 vesicle; GO:0005737 cytoplasm; GO:0005583 fibrillar collagen trimer; GO:0032991 macromolecular complex; GO:0099512 supramolecular fiber; GO:0044424 intracellular part; GO:0099080 sup…	GO:0005201 extracellular matrix structural constituent; GO:0042802 identical protein binding; GO:0019838 growth factor binding; GO:0005488 binding; GO:0043167 ion binding; GO:0048407 platelet-derived growth factor binding; GO:0046872 metal ion binding; GO:0043169 cation binding; GO:0005515 protein binding; GO:0005198 structural molecule activity;	K06236	COL1A; collagen, type I, alpha	hsa04151 PI3K-Akt signaling pathway - Homo sapiens (human); hsa04510 Focal adhesion - Homo sapiens (human); hsa04512 ECM-receptor interaction - Homo sapiens (human); hsa04611 Platelet activation - Homo sapiens (human); hsa04926 Relaxin signaling pathway - Homo sapiens (human); hsa04933 AGE-RAGE signaling pathway in diabetic complications - Homo sapiens (human); hsa04974 Protein digestion and abso…	IPR001007; IPR000885;	VWFC domain; Fibrillar collagen, C-terminal;	W	KOG3544	Collagens (type IV and type XIII), and related proteins
Q15813	Tubulin-specific chaperone E OS=Homo sapiens OX=9606 GN=TBCE PE=1 SV=1	TBCE	59.345	18.2	0.971	0.62438	cytoplasm	GO:0003012 muscle system process; GO:0048935 peripheral nervous system neuron development; GO:0007067 mitotic nuclear division; GO:0048869 cellular developmental process; GO:0048666 neuron development; GO:0048936 peripheral nervous system neuron axonogenesis; GO:0032989 cellular component morphogenesis; GO:0022008 neurogenesis; GO:0044699 single-organism process; GO:0006457 protein folding; GO:00…	GO:0043229 intracellular organelle; GO:0099513 polymeric cytoskeletal fiber; GO:0005874 microtubule; GO:0043232 intracellular non-membrane-bounded organelle; GO:0044430 cytoskeletal part; GO:0005737 cytoplasm; GO:0044446 intracellular organelle part; GO:0099512 supramolecular fiber; GO:0044424 intracellular part; GO:0099080 supramolecular complex; GO:0005623 cell; GO:0044422 organelle part; GO:00…	GO:0005515 protein binding; GO:0051087 chaperone binding; GO:0005488 binding;	K21768	TBCE; tubulin-specific chaperone E		IPR029071; IPR000626; IPR032675; IPR000938;	Ubiquitin-related domain; Ubiquitin domain; Leucine-rich repeat domain, L domain-like; CAP Gly-rich domain;	O	KOG3207	Beta-tubulin folding cofactor E
Q99460	26S proteasome non-ATPase regulatory subunit 1 OS=Homo sapiens OX=9606 GN=PSMD1 PE=1 SV=2	PSMD1	105.84	45	1.051	0.3339	cytoplasm	GO:0044700 single organism signaling; GO:0010608 posttranscriptional regulation of gene expression; GO:0051443 positive regulation of ubiquitin-protein transferase activity; GO:0031347 regulation of defense response; GO:0010564 regulation of cell cycle process; GO:0044237 cellular metabolic process; GO:1903364 positive regulation of cellular protein catabolic process; GO:0008152 metabolic process…	GO:0034774 secretory granule lumen; GO:0016020 membrane; GO:0044421 extracellular region part; GO:0031410 cytoplasmic vesicle; GO:0005838 proteasome regulatory particle; GO:0005737 cytoplasm; GO:0031982 vesicle; GO:0044433 cytoplasmic vesicle part; GO:0032991 macromolecular complex; GO:0044424 intracellular part; GO:0035578 azurophil granule lumen; GO:0005623 cell; GO:0044422 organelle part; GO:0…	GO:0030234 enzyme regulator activity; GO:0098772 molecular function regulator; GO:0005488 binding;	K03032	PSMD1, RPN2; 26S proteasome regulatory subunit N2	hsa03050 Proteasome - Homo sapiens (human); hsa05169 Epstein-Barr virus infection - Homo sapiens (human);	IPR011989; IPR016024;	Armadillo-like helical; Armadillo-type fold;	O	KOG2062	26S proteasome regulatory complex, subunit RPN2/PSMD1
Q9H4X1	Regulator of cell cycle RGCC OS=Homo sapiens OX=9606 GN=RGCC PE=1 SV=1	RGCC	14.559	15.3	0.673	0.23864	nucleus	GO:0044700 single organism signaling; GO:1902807 negative regulation of cell cycle G1/S phase transition; GO:0010941 regulation of cell death; GO:0009891 positive regulation of biosynthetic process; GO:0010564 regulation of cell cycle process; GO:0010594 regulation of endothelial cell migration; GO:0072431 signal transduction involved in mitotic G1 DNA damage checkpoint; GO:1902403 signal transdu…	GO:0043229 intracellular organelle; GO:0043232 intracellular non-membrane-bounded organelle; GO:0044430 cytoskeletal part; GO:0044446 intracellular organelle part; GO:0005737 cytoplasm; GO:0031981 nuclear lumen; GO:0044424 intracellular part; GO:0005730 nucleolus; GO:0005829 cytosol; GO:0005623 cell; GO:0044422 organelle part; GO:0043228 non-membrane-bounded organelle; GO:0031974 membrane-enclose…	GO:0019209 kinase activator activity; GO:0030295 protein kinase activator activity; GO:0030234 enzyme regulator activity; GO:0005488 binding; GO:0019901 protein kinase binding; GO:0005515 protein binding; GO:0019887 protein kinase regulator activity; GO:0019207 kinase regulator activity; GO:0070412 R-SMAD binding; GO:0098772 molecular function regulator; GO:0019900 kinase binding; GO:0046332 SMAD…
Q14919	Dr1-associated corepressor OS=Homo sapiens OX=9606 GN=DRAP1 PE=1 SV=3	DRAP1	22.35	26.3	1.173	0.035035	plasma membrane	GO:0097659 nucleic acid-templated transcription; GO:0009058 biosynthetic process; GO:0051253 negative regulation of RNA metabolic process; GO:0044237 cellular metabolic process; GO:2001141 regulation of RNA biosynthetic process; GO:0008152 metabolic process; GO:0010558 negative regulation of macromolecule biosynthetic process; GO:0043170 macromolecule metabolic process; GO:1903507 negative regula…	GO:0043226 organelle; GO:0043231 intracellular membrane-bounded organelle; GO:0043229 intracellular organelle; GO:0005634 nucleus; GO:0044464 cell part; GO:0005622 intracellular; GO:0044424 intracellular part; GO:0043227 membrane-bounded organelle; GO:0005623 cell;	GO:0003677 DNA binding; GO:0003714 transcription corepressor activity; GO:0046982 protein heterodimerization activity; GO:0046983 protein dimerization activity; GO:0005515 protein binding; GO:0003712 transcription cofactor activity; GO:0003700 transcription factor activity, sequence-specific DNA binding; GO:1901363 heterocyclic compound binding; GO:0097159 organic cyclic compound binding; GO:0042…	K21752	DRAP1, NC2-alpha; Dr1-associated corepressor		IPR003958; IPR009072;	Transcription factor CBF/NF-Y/archaeal histone domain; Histone-fold;	K	KOG1659	Class 2 transcription repressor NC2, alpha subunit (DRAP1)
Q9Y291	28S ribosomal protein S33, mitochondrial OS=Homo sapiens OX=9606 GN=MRPS33 PE=1 SV=1	MRPS33	12.629	8.5	0.593	0.04222	nucleus	GO:0016043 cellular component organization; GO:0006518 peptide metabolic process; GO:0044267 cellular protein metabolic process; GO:0044699 single-organism process; GO:0009058 biosynthetic process; GO:1901566 organonitrogen compound biosynthetic process; GO:0044237 cellular metabolic process; GO:0043241 protein complex disassembly; GO:0071704 organic substance metabolic process; GO:0008152 metabo…	GO:0016020 membrane; GO:0031090 organelle membrane; GO:0015935 small ribosomal subunit; GO:0005737 cytoplasm; GO:0032991 macromolecular complex; GO:0044424 intracellular part; GO:0005623 cell; GO:0000313 organellar ribosome; GO:0044422 organelle part; GO:0043228 non-membrane-bounded organelle; GO:0005740 mitochondrial envelope; GO:0031974 membrane-enclosed lumen; GO:0070013 intracellular organell…	GO:0003735 structural constituent of ribosome; GO:0005198 structural molecule activity;	K17411	MRPS33; small subunit ribosomal protein S33				T	KOG4104	Ganglioside-induced differentiation associated protein 3
P61247	40S ribosomal protein S3a OS=Homo sapiens OX=9606 GN=RPS3A PE=1 SV=2	RPS3A	29.945	62.1	0.526	2.1552e-05	nucleus	GO:0044085 cellular component biogenesis; GO:0022613 ribonucleoprotein complex biogenesis; GO:0010941 regulation of cell death; GO:0072594 establishment of protein localization to organelle; GO:0006518 peptide metabolic process; GO:0048869 cellular developmental process; GO:0044699 single-organism process; GO:0009058 biosynthetic process; GO:0044764 multi-organism cellular process; GO:0044237 cel…	GO:0044421 extracellular region part; GO:0005783 endoplasmic reticulum; GO:0030054 cell junction; GO:0015935 small ribosomal subunit; GO:0031982 vesicle; GO:0005737 cytoplasm; GO:0032991 macromolecular complex; GO:0044424 intracellular part; GO:0005623 cell; GO:0044422 organelle part; GO:0043228 non-membrane-bounded organelle; GO:0070062 extracellular exosome; GO:0031974 membrane-enclosed lumen; …	GO:0097159 organic cyclic compound binding; GO:1901363 heterocyclic compound binding; GO:0003723 RNA binding; GO:0005488 binding; GO:0003676 nucleic acid binding; GO:0005515 protein binding; GO:0005198 structural molecule activity; GO:0003735 structural constituent of ribosome;	K02984	RP-S3Ae, RPS3A; small subunit ribosomal protein S3Ae	hsa03010 Ribosome - Homo sapiens (human);			J	KOG1628	40S ribosomal protein S3A
Q8N392	Rho GTPase-activating protein 18 OS=Homo sapiens OX=9606 GN=ARHGAP18 PE=1 SV=3	ARHGAP18	74.976	17.6	1.311	0.036096	cytoplasm	GO:0044700 single organism signaling; GO:0030833 regulation of actin filament polymerization; GO:0050794 regulation of cellular process; GO:0016043 cellular component organization; GO:0065008 regulation of biological quality; GO:0032956 regulation of actin cytoskeleton organization; GO:0023051 regulation of signaling; GO:0044699 single-organism process; GO:0044087 regulation of cellular component…	GO:0016020 membrane; GO:0043229 intracellular organelle; GO:0071944 cell periphery; GO:0005737 cytoplasm; GO:0044446 intracellular organelle part; GO:0031981 nuclear lumen; GO:0044424 intracellular part; GO:0005829 cytosol; GO:0005623 cell; GO:0016604 nuclear body; GO:0044422 organelle part; GO:0005886 plasma membrane; GO:0031974 membrane-enclosed lumen; GO:0043226 organelle; GO:0043231 intracell…	GO:0050839 cell adhesion molecule binding; GO:0030234 enzyme regulator activity; GO:0060589 nucleoside-triphosphatase regulator activity; GO:0005488 binding; GO:0030695 GTPase regulator activity; GO:0045296 cadherin binding; GO:0005515 protein binding; GO:0098772 molecular function regulator; GO:0008047 enzyme activator activity; GO:0005096 GTPase activator activity;	K20639	ARHGAP18_28_40; Rho GTPase-activating protein 18/28/40		IPR008936; IPR000198;	Rho GTPase activation protein; Rho GTPase-activating protein domain;	T	KOG2200	Tumour suppressor protein p122-RhoGAP/DLC1
Q96BJ3	Axin interactor, dorsalization-associated protein OS=Homo sapiens OX=9606 GN=AIDA PE=1 SV=1	AIDA	35.023	22.2	0.971	0.77634	nucleus	GO:0032872 regulation of stress-activated MAPK cascade; GO:0009968 negative regulation of signal transduction; GO:0023051 regulation of signaling; GO:0044699 single-organism process; GO:0043506 regulation of JUN kinase activity; GO:0031400 negative regulation of protein modification process; GO:0071900 regulation of protein serine/threonine kinase activity; GO:0009953 dorsal/ventral pattern forma…	GO:0016020 membrane; GO:0044424 intracellular part; GO:0005623 cell; GO:0044464 cell part; GO:0005622 intracellular; GO:0005737 cytoplasm;	GO:0005488 binding; GO:0035091 phosphatidylinositol binding; GO:0005543 phospholipid binding; GO:0043167 ion binding; GO:0008289 lipid binding; GO:0019904 protein domain specific binding; GO:0043168 anion binding; GO:0005515 protein binding;				IPR023421; IPR025939;	Axin interactor, dorsalization-associated protein, N-terminal; Axin interactor dorsalization-associated protein, C-terminal domain;
Q6ZT12	E3 ubiquitin-protein ligase UBR3 OS=Homo sapiens OX=9606 GN=UBR3 PE=2 SV=2	UBR3	212.43	0.5			plasma membrane	GO:0044707 single-multicellular organism process; GO:0051603 proteolysis involved in cellular protein catabolic process; GO:0044257 cellular protein catabolic process; GO:0001967 suckling behavior; GO:0043009 chordate embryonic development; GO:0044267 cellular protein metabolic process; GO:0044699 single-organism process; GO:0007635 chemosensory behavior; GO:0050896 response to stimulus; GO:00442…	GO:0016020 membrane; GO:1902494 catalytic complex; GO:0044425 membrane part; GO:0044464 cell part; GO:0005622 intracellular; GO:0005737 cytoplasm; GO:0032991 macromolecular complex; GO:0031224 intrinsic component of membrane; GO:0044424 intracellular part; GO:1990234 transferase complex; GO:0000151 ubiquitin ligase complex; GO:0005623 cell; GO:0016021 integral component of membrane;	GO:0061630 ubiquitin protein ligase activity; GO:0019787 ubiquitin-like protein transferase activity; GO:0046914 transition metal ion binding; GO:0003824 catalytic activity; GO:0005488 binding; GO:0004842 ubiquitin-protein transferase activity; GO:0043167 ion binding; GO:0046872 metal ion binding; GO:0043169 cation binding; GO:0061659 ubiquitin-like protein ligase activity; GO:0008270 zinc ion bi…	K11978	UBR3; E3 ubiquitin-protein ligase UBR3 [EC:2.3.2.27]		IPR013083; IPR003126;	Zinc finger, RING/FYVE/PHD-type; Zinc finger, UBR-type;	O	KOG1139	Predicted ubiquitin-protein ligase of the N-recognin family
Q9HD67	Unconventional myosin-X OS=Homo sapiens OX=9606 GN=MYO10 PE=1 SV=3	MYO10	237.34	0.8	0.266	0.009015	nucleus	GO:0044700 single organism signaling; GO:0050794 regulation of cellular process; GO:0046907 intracellular transport; GO:0065008 regulation of biological quality; GO:0002429 immune response-activating cell surface receptor signaling pathway; GO:0007166 cell surface receptor signaling pathway; GO:0002252 immune effector process; GO:0060491 regulation of cell projection assembly; GO:0038094 Fc-gamma…	GO:0016020 membrane; GO:0005938 cell cortex; GO:0071944 cell periphery; GO:0005737 cytoplasm; GO:0099568 cytoplasmic region; GO:0043025 neuronal cell body; GO:0032991 macromolecular complex; GO:0044424 intracellular part; GO:0098858 actin-based cell projection; GO:0005623 cell; GO:0044422 organelle part; GO:0043228 non-membrane-bounded organelle; GO:0031974 membrane-enclosed lumen; GO:0005856 cyt…	GO:0051015 actin filament binding; GO:0060002 plus-end directed microfilament motor activity; GO:1901265 nucleoside phosphate binding; GO:0003774 motor activity; GO:0016817 hydrolase activity, acting on acid anhydrides; GO:0016787 hydrolase activity; GO:0005515 protein binding; GO:0016887 ATPase activity; GO:1901363 heterocyclic compound binding; GO:0097159 organic cyclic compound binding; GO:000…	K12559	MYO10; myosin X	hsa04666 Fc gamma R-mediated phagocytosis - Homo sapiens (human);	IPR019748; IPR027417; IPR000857; IPR001849; IPR019749; IPR031971; IPR011993; IPR001609; IPR000299; IPR000159; IPR014352;	FERM central domain; P-loop containing nucleoside triphosphate hydrolase; MyTH4 domain; Pleckstrin homology domain; Band 4.1 domain; Unconventional myosin-X, coiled coil domain; PH domain-like; Myosin head, motor domain; FERM domain; Ras-associating (RA) domain; FERM/acyl-CoA-binding protein, 3-helical bundle;	N	KOG4229	Myosin VII, myosin IXB and related myosins
Q7Z4Q2	HEAT repeat-containing protein 3 OS=Homo sapiens OX=9606 GN=HEATR3 PE=1 SV=2	HEATR3	74.582	5.6	1.424	0.102723	nucleus	GO:0044085 cellular component biogenesis; GO:0046907 intracellular transport; GO:0022613 ribonucleoprotein complex biogenesis; GO:0072594 establishment of protein localization to organelle; GO:0017038 protein import; GO:1902593 single-organism nuclear import; GO:0044699 single-organism process; GO:0051169 nuclear transport; GO:0042273 ribosomal large subunit biogenesis; GO:0015031 protein transpo…	GO:0005623 cell; GO:0005622 intracellular; GO:0044464 cell part;	GO:0005515 protein binding; GO:0051082 unfolded protein binding; GO:0005488 binding;				IPR011989; IPR016024;	Armadillo-like helical; Armadillo-type fold;
Q9NTI5	Sister chromatid cohesion protein PDS5 homolog B OS=Homo sapiens OX=9606 GN=PDS5B PE=1 SV=1	PDS5B	164.67	2.4	1.077	0.49762	nucleus	GO:0050794 regulation of cellular process; GO:0033554 cellular response to stress; GO:0016043 cellular component organization; GO:0006725 cellular aromatic compound metabolic process; GO:0042127 regulation of cell proliferation; GO:0006259 DNA metabolic process; GO:0007067 mitotic nuclear division; GO:0048285 organelle fission; GO:0044699 single-organism process; GO:0048523 negative regulation of…	GO:0043229 intracellular organelle; GO:0043232 intracellular non-membrane-bounded organelle; GO:0044446 intracellular organelle part; GO:0005737 cytoplasm; GO:0031981 nuclear lumen; GO:0044424 intracellular part; GO:0005829 cytosol; GO:0005623 cell; GO:0044422 organelle part; GO:0044427 chromosomal part; GO:0043228 non-membrane-bounded organelle; GO:0098687 chromosomal region; GO:0043231 intracel…	GO:0003677 DNA binding; GO:0005524 ATP binding; GO:1901265 nucleoside phosphate binding; GO:0001882 nucleoside binding; GO:0043167 ion binding; GO:0005515 protein binding; GO:0000166 nucleotide binding; GO:1901363 heterocyclic compound binding; GO:0097159 organic cyclic compound binding; GO:0032549 ribonucleoside binding; GO:0097367 carbohydrate derivative binding; GO:0032553 ribonucleotide bindi…	K11267	PDS5; sister chromatid cohesion protein PDS5		IPR011989; IPR016024;	Armadillo-like helical; Armadillo-type fold;	D	KOG1525	Sister chromatid cohesion complex Cohesin, subunit PDS5
Q6NUQ4	Transmembrane protein 214 OS=Homo sapiens OX=9606 GN=TMEM214 PE=1 SV=2	TMEM214	77.15	18.7	1.335	0.029404	cytoplasm	GO:0044763 single-organism cellular process; GO:0044699 single-organism process; GO:0012501 programmed cell death; GO:0009987 cellular process; GO:0008219 cell death; GO:0006915 apoptotic process;	GO:0016020 membrane; GO:0042175 nuclear outer membrane-endoplasmic reticulum membrane network; GO:0005783 endoplasmic reticulum; GO:0005874 microtubule; GO:0005881 cytoplasmic microtubule; GO:0005737 cytoplasm; GO:0031224 intrinsic component of membrane; GO:0099512 supramolecular fiber; GO:0044424 intracellular part; GO:0099080 supramolecular complex; GO:0005623 cell; GO:0044422 organelle part; G…							S	KOG4467	Uncharacterized conserved protein
P49585	Choline-phosphate cytidylyltransferase A OS=Homo sapiens OX=9606 GN=PCYT1A PE=1 SV=2	PCYT1A	41.731	19.3	1.15	0.66034	nucleus	GO:0046470 phosphatidylcholine metabolic process; GO:0046486 glycerolipid metabolic process; GO:0008654 phospholipid biosynthetic process; GO:0097164 ammonium ion metabolic process; GO:0044699 single-organism process; GO:0009058 biosynthetic process; GO:0044255 cellular lipid metabolic process; GO:1901566 organonitrogen compound biosynthetic process; GO:0044237 cellular metabolic process; GO:0006…	GO:0043229 intracellular organelle; GO:0016020 membrane; GO:0042175 nuclear outer membrane-endoplasmic reticulum membrane network; GO:0005783 endoplasmic reticulum; GO:0005635 nuclear envelope; GO:0071944 cell periphery; GO:0031967 organelle envelope; GO:0044446 intracellular organelle part; GO:0005737 cytoplasm; GO:0012505 endomembrane system; GO:0044424 intracellular part; GO:0005829 cytosol; G…	GO:0070405 ammonium ion binding; GO:0046983 protein dimerization activity; GO:0043167 ion binding; GO:0005515 protein binding; GO:0004105 choline-phosphate cytidylyltransferase activity; GO:0005516 calmodulin binding; GO:0031210 phosphatidylcholine binding; GO:0070567 cytidylyltransferase activity; GO:0050997 quaternary ammonium group binding; GO:0042802 identical protein binding; GO:0016779 nucl…	K00968	PCYT1; choline-phosphate cytidylyltransferase [EC:2.7.7.15]	hsa00440 Phosphonate and phosphinate metabolism - Homo sapiens (human); hsa00564 Glycerophospholipid metabolism - Homo sapiens (human); hsa01100 Metabolic pathways - Homo sapiens (human); hsa05231 Choline metabolism in cancer - Homo sapiens (human);	IPR014729; IPR004821;	Rossmann-like alpha/beta/alpha sandwich fold; Cytidyltransferase-like domain;	I	KOG2804	Phosphorylcholine transferase/cholinephosphate cytidylyltransferase
O14981	TATA-binding protein-associated factor 172 OS=Homo sapiens OX=9606 GN=BTAF1 PE=1 SV=2	BTAF1	206.89	0.7	1.757	0.00145774	plasma membrane	GO:0050794 regulation of cellular process; GO:0060255 regulation of macromolecule metabolic process; GO:0019219 regulation of nucleobase-containing compound metabolic process; GO:0048523 negative regulation of cellular process; GO:0031324 negative regulation of cellular metabolic process; GO:0048519 negative regulation of biological process; GO:0051253 negative regulation of RNA metabolic process…	GO:0031974 membrane-enclosed lumen; GO:0043231 intracellular membrane-bounded organelle; GO:0043226 organelle; GO:0043229 intracellular organelle; GO:0005634 nucleus; GO:0005654 nucleoplasm; GO:0070013 intracellular organelle lumen; GO:0044464 cell part; GO:0005622 intracellular; GO:0044446 intracellular organelle part; GO:0031981 nuclear lumen; GO:0044424 intracellular part; GO:0043227 membrane-…	GO:1901265 nucleoside phosphate binding; GO:0016817 hydrolase activity, acting on acid anhydrides; GO:0016787 hydrolase activity; GO:0003700 transcription factor activity, sequence-specific DNA binding; GO:1901363 heterocyclic compound binding; GO:0097159 organic cyclic compound binding; GO:0016462 pyrophosphatase activity; GO:0003824 catalytic activity; GO:0032553 ribonucleotide binding; GO:0005…	K15192	BTAF1, MOT1; TATA-binding protein-associated factor [EC:3.6.4.-]		IPR011989; IPR027417; IPR014001; IPR016024; IPR001650; IPR022707; IPR000330;	Armadillo-like helical; P-loop containing nucleoside triphosphate hydrolase; Helicase superfamily 1/2, ATP-binding domain; Armadillo-type fold; Helicase, C-terminal; Domain of unknown function DUF3535; SNF2-related, N-terminal domain;	KL	KOG0387	Transcription-coupled repair protein CSB/RAD26 (contains SNF2 family DNA-dependent ATPase domain)
P82675	28S ribosomal protein S5, mitochondrial OS=Homo sapiens OX=9606 GN=MRPS5 PE=1 SV=2	MRPS5	48.006	7.2	1.126	0.57634	mitochondria	GO:0016043 cellular component organization; GO:0006518 peptide metabolic process; GO:0044267 cellular protein metabolic process; GO:0044699 single-organism process; GO:0009058 biosynthetic process; GO:1901566 organonitrogen compound biosynthetic process; GO:0044237 cellular metabolic process; GO:0043241 protein complex disassembly; GO:0071704 organic substance metabolic process; GO:0008152 metabo…	GO:0016020 membrane; GO:0031090 organelle membrane; GO:0015935 small ribosomal subunit; GO:0005737 cytoplasm; GO:0032991 macromolecular complex; GO:0044424 intracellular part; GO:0005623 cell; GO:0000313 organellar ribosome; GO:0044422 organelle part; GO:0043228 non-membrane-bounded organelle; GO:0005740 mitochondrial envelope; GO:0031974 membrane-enclosed lumen; GO:0070013 intracellular organell…	GO:0097159 organic cyclic compound binding; GO:1901363 heterocyclic compound binding; GO:0003723 RNA binding; GO:0005488 binding; GO:0003676 nucleic acid binding; GO:0005198 structural molecule activity; GO:0003735 structural constituent of ribosome;	K02988	RP-S5, MRPS5, rpsE; small subunit ribosomal protein S5	hsa03010 Ribosome - Homo sapiens (human);	IPR014720; IPR005324; IPR020568; IPR014721; IPR013810;	Double-stranded RNA-binding domain; Ribosomal protein S5, C-terminal; Ribosomal protein S5 domain 2-type fold; Ribosomal protein S5 domain 2-type fold, subgroup; Ribosomal protein S5, N-terminal;	J	KOG2646	Ribosomal protein S5
Q8N999	Uncharacterized protein C12orf29 OS=Homo sapiens OX=9606 GN=C12orf29 PE=1 SV=2	C12orf29	37.49	3.1			mitochondria	GO:0032502 developmental process; GO:0002244 hematopoietic progenitor cell differentiation; GO:0044707 single-multicellular organism process; GO:0048731 system development; GO:0048869 cellular developmental process; GO:0044763 single-organism cellular process; GO:0044699 single-organism process; GO:0002520 immune system development; GO:0002376 immune system process; GO:0032501 multicellular organ…
Q13601	KRR1 small subunit processome component homolog OS=Homo sapiens OX=9606 GN=KRR1 PE=1 SV=4	KRR1	43.664	12.1	1.886	0.06162	nucleus	GO:0016072 rRNA metabolic process; GO:0006396 RNA processing; GO:0034470 ncRNA processing; GO:0044085 cellular component biogenesis; GO:0022613 ribonucleoprotein complex biogenesis; GO:0006725 cellular aromatic compound metabolic process; GO:0042274 ribosomal small subunit biogenesis; GO:0006807 nitrogen compound metabolic process; GO:0042254 ribosome biogenesis; GO:1901360 organic cyclic compoun…	GO:0043229 intracellular organelle; GO:0016020 membrane; GO:0044421 extracellular region part; GO:0043232 intracellular non-membrane-bounded organelle; GO:0005737 cytoplasm; GO:0044446 intracellular organelle part; GO:0032991 macromolecular complex; GO:0031981 nuclear lumen; GO:0044424 intracellular part; GO:0005730 nucleolus; GO:0005623 cell; GO:0005576 extracellular region; GO:0044422 organelle…	GO:0097159 organic cyclic compound binding; GO:1901363 heterocyclic compound binding; GO:0003723 RNA binding; GO:0005515 protein binding; GO:0005488 binding; GO:0003676 nucleic acid binding;	K06961	KRR1; ribosomal RNA assembly protein		IPR004087; IPR004088;	K Homology domain; K Homology domain, type 1;	JD	KOG2874	rRNA processing protein
P56589	Peroxisomal biogenesis factor 3 OS=Homo sapiens OX=9606 GN=PEX3 PE=1 SV=1	PEX3	42.139	1.9	0.701	0.110818	peroxisome	GO:0044085 cellular component biogenesis; GO:0046907 intracellular transport; GO:0016557 peroxisome membrane biogenesis; GO:0016043 cellular component organization; GO:0072594 establishment of protein localization to organelle; GO:0015919 peroxisomal membrane transport; GO:0017038 protein import; GO:0072663 establishment of protein localization to peroxisome; GO:0044699 single-organism process; G…	GO:0016020 membrane; GO:0005783 endoplasmic reticulum; GO:0031090 organelle membrane; GO:0005737 cytoplasm; GO:0032991 macromolecular complex; GO:0044438 microbody part; GO:0031224 intrinsic component of membrane; GO:0044424 intracellular part; GO:0005623 cell; GO:0044422 organelle part; GO:0005778 peroxisomal membrane; GO:0031974 membrane-enclosed lumen; GO:0005654 nucleoplasm; GO:0031301 integr…	GO:0008289 lipid binding; GO:0005515 protein binding; GO:0005488 binding; GO:0046983 protein dimerization activity;	K13336	PEX3; peroxin-3	hsa04146 Peroxisome - Homo sapiens (human);			MU	KOG4444	Peroxisomal assembly protein PEX3
Q9Y6M7	Sodium bicarbonate cotransporter 3 OS=Homo sapiens OX=9606 GN=SLC4A7 PE=1 SV=2	SLC4A7	136.04	3	1.508	0.176178	plasma membrane	GO:0065008 regulation of biological quality; GO:0060113 inner ear receptor cell differentiation; GO:0048869 cellular developmental process; GO:0048666 neuron development; GO:0030641 regulation of cellular pH; GO:0030004 cellular monovalent inorganic cation homeostasis; GO:0044699 single-organism process; GO:0022008 neurogenesis; GO:0051234 establishment of localization; GO:0035315 hair cell diffe…	GO:0016323 basolateral plasma membrane; GO:0016020 membrane; GO:0098862 cluster of actin-based cell projections; GO:0016324 apical plasma membrane; GO:0031410 cytoplasmic vesicle; GO:0071944 cell periphery; GO:0005737 cytoplasm; GO:0031982 vesicle; GO:0031224 intrinsic component of membrane; GO:0044424 intracellular part; GO:0005887 integral component of plasma membrane; GO:0098858 actin-based ce…	GO:0015294 solute:cation symporter activity; GO:0022804 active transmembrane transporter activity; GO:0015291 secondary active transmembrane transporter activity; GO:0005452 inorganic anion exchanger activity; GO:0015075 ion transmembrane transporter activity; GO:0022853 active ion transmembrane transporter activity; GO:0015293 symporter activity; GO:0015106 bicarbonate transmembrane transporter …	K13858	SLC4A7, NBC3; solute carrier family 4 (sodium bicarbonate cotransporter), member 7		IPR011531; IPR013769; IPR016152;	Bicarbonate transporter, C-terminal; Band 3 cytoplasmic domain; Phosphotransferase/anion transporter;	P	KOG1172	Na+-independent Cl/HCO3 exchanger AE1 and related transporters (SLC4 family)
Q8NC44	Reticulophagy regulator 2 OS=Homo sapiens OX=9606 GN=RETREG2 PE=1 SV=3	RETREG2	57.829	4.6	2.125	7.7168e-05	plasma membrane		GO:0031224 intrinsic component of membrane; GO:0016020 membrane; GO:0016021 integral component of membrane; GO:0044425 membrane part;
Q9Y6R0	Numb-like protein OS=Homo sapiens OX=9606 GN=NUMBL PE=1 SV=1	NUMBL	64.891	22	1.587	0.00022036	nucleus	GO:0044700 single organism signaling; GO:0048103 somatic stem cell division; GO:0007166 cell surface receptor signaling pathway; GO:0007420 brain development; GO:0048869 cellular developmental process; GO:0048666 neuron development; GO:0045216 cell-cell junction organization; GO:0032989 cellular component morphogenesis; GO:0022008 neurogenesis; GO:0044699 single-organism process; GO:0071345 cellu…	GO:0044424 intracellular part; GO:0005623 cell; GO:0044464 cell part; GO:0005622 intracellular; GO:0005737 cytoplasm;	GO:0005515 protein binding; GO:0005488 binding;	K06057	NUMBL; numb	hsa04330 Notch signaling pathway - Homo sapiens (human);	IPR010449; IPR011993; IPR006020;	NUMB domain; PH domain-like; PTB/PI domain;	T	KOG3537	Adaptor protein NUMB
Q8TBC4	NEDD8-activating enzyme E1 catalytic subunit OS=Homo sapiens OX=9606 GN=UBA3 PE=1 SV=2	UBA3	51.852	18.4	1.304	0.191077	cytoplasm	GO:0044700 single organism signaling; GO:0044699 single-organism process; GO:0007113 endomitotic cell cycle; GO:0051253 negative regulation of RNA metabolic process; GO:0044237 cellular metabolic process; GO:2001141 regulation of RNA biosynthetic process; GO:0008152 metabolic process; GO:0007165 signal transduction; GO:0007154 cell communication; GO:0010558 negative regulation of macromolecule bi…	GO:0043226 organelle; GO:0043231 intracellular membrane-bounded organelle; GO:0043229 intracellular organelle; GO:0005634 nucleus; GO:0044464 cell part; GO:0005622 intracellular; GO:0005737 cytoplasm; GO:0044424 intracellular part; GO:0043227 membrane-bounded organelle; GO:0005829 cytosol; GO:0005623 cell; GO:0044444 cytoplasmic part;	GO:1901265 nucleoside phosphate binding; GO:0005102 receptor binding; GO:0046983 protein dimerization activity; GO:0016874 ligase activity; GO:0005515 protein binding; GO:0016877 ligase activity, forming carbon-sulfur bonds; GO:0097159 organic cyclic compound binding; GO:1901363 heterocyclic compound binding; GO:0042802 identical protein binding; GO:0003824 catalytic activity; GO:0032553 ribonucl…	K10686	UBE1C, UBA3; ubiquitin-activating enzyme E1 C [EC:6.2.1.45]	hsa04120 Ubiquitin mediated proteolysis - Homo sapiens (human);	IPR000594; IPR023318; IPR016040; IPR014929;	THIF-type NAD/FAD binding fold; Ubiquitin activating enzyme, alpha domain; NAD(P)-binding domain; E2 binding;	O	KOG2015	NEDD8-activating complex, catalytic component UBA3
P53985	Monocarboxylate transporter 1 OS=Homo sapiens OX=9606 GN=SLC16A1 PE=1 SV=3	SLC16A1	53.944	2.4	1.235	0.134223	plasma membrane	GO:0015850 organic hydroxy compound transport; GO:0065008 regulation of biological quality; GO:0051674 localization of cell; GO:0042593 glucose homeostasis; GO:0050796 regulation of insulin secretion; GO:0023051 regulation of signaling; GO:0051780 behavioral response to nutrient; GO:0044699 single-organism process; GO:0051046 regulation of secretion; GO:0044237 cellular metabolic process; GO:0051…	GO:0016020 membrane; GO:0044421 extracellular region part; GO:0071944 cell periphery; GO:0030054 cell junction; GO:0031982 vesicle; GO:0005737 cytoplasm; GO:0031224 intrinsic component of membrane; GO:0044424 intracellular part; GO:0005887 integral component of plasma membrane; GO:0005623 cell; GO:0044422 organelle part; GO:0043228 non-membrane-bounded organelle; GO:0005856 cytoskeleton; GO:00700…	GO:0005342 organic acid transmembrane transporter activity; GO:0022804 active transmembrane transporter activity; GO:0015291 secondary active transmembrane transporter activity; GO:0015075 ion transmembrane transporter activity; GO:0015293 symporter activity; GO:0046983 protein dimerization activity; GO:1901618 organic hydroxy compound transmembrane transporter activity; GO:0022892 substrate-spec…	K08179	SLC16A1; MFS transporter, MCP family, solute carrier family 16 (monocarboxylic acid transporters), member 1		IPR020846;	Major facilitator superfamily domain;	G	KOG2504	Monocarboxylate transporter
Q9H3K2	Growth hormone-inducible transmembrane protein OS=Homo sapiens OX=9606 GN=GHITM PE=1 SV=2	GHITM	37.205	2.9			plasma membrane	GO:0044763 single-organism cellular process; GO:0044699 single-organism process; GO:0012501 programmed cell death; GO:0009987 cellular process; GO:0008219 cell death; GO:0006915 apoptotic process;	GO:0016020 membrane; GO:0044421 extracellular region part; GO:0031090 organelle membrane; GO:0005737 cytoplasm; GO:0031982 vesicle; GO:0031224 intrinsic component of membrane; GO:0044424 intracellular part; GO:0005623 cell; GO:0044422 organelle part; GO:0005740 mitochondrial envelope; GO:0070062 extracellular exosome; GO:0044425 membrane part; GO:0005622 intracellular; GO:0044464 cell part; GO:00…	GO:0005515 protein binding; GO:0005488 binding;	K21890	GHITM, DERP2, TMBIM5; growth hormone-inducible transmembrane protein				T	KOG1630	Growth hormone-induced protein and related proteins
Q99952	Tyrosine-protein phosphatase non-receptor type 18 OS=Homo sapiens OX=9606 GN=PTPN18 PE=1 SV=2	PTPN18	50.482	4.6			cytoplasm,nucleus	GO:0050794 regulation of cellular process; GO:0044700 single organism signaling; GO:0009968 negative regulation of signal transduction; GO:0007166 cell surface receptor signaling pathway; GO:1901185 negative regulation of ERBB signaling pathway; GO:0023051 regulation of signaling; GO:0044267 cellular protein metabolic process; GO:0044699 single-organism process; GO:0048519 negative regulation of …	GO:0043226 organelle; GO:0043231 intracellular membrane-bounded organelle; GO:0043229 intracellular organelle; GO:0005634 nucleus; GO:0044464 cell part; GO:0005622 intracellular; GO:0005737 cytoplasm; GO:0044424 intracellular part; GO:0005829 cytosol; GO:0043227 membrane-bounded organelle; GO:0005623 cell; GO:0044444 cytoplasmic part;	GO:0004725 protein tyrosine phosphatase activity; GO:0003824 catalytic activity; GO:0042578 phosphoric ester hydrolase activity; GO:0005488 binding; GO:0016791 phosphatase activity; GO:0016788 hydrolase activity, acting on ester bonds; GO:0004726 non-membrane spanning protein tyrosine phosphatase activity; GO:0005515 protein binding; GO:0016787 hydrolase activity; GO:0004721 phosphoprotein phosph…	K18024	PTPN12_18_22; tyrosine-protein phosphatase non-receptor type 12/18/22 [EC:3.1.3.48]		IPR029021; IPR000387; IPR000242; IPR003595;	Protein-tyrosine phosphatase-like; Tyrosine specific protein phosphatases domain; PTP type protein phosphatase; Protein-tyrosine phosphatase, catalytic;	T	KOG0789	Protein tyrosine phosphatase
Q7Z392	Trafficking protein particle complex subunit 11 OS=Homo sapiens OX=9606 GN=TRAPPC11 PE=1 SV=2	TRAPPC11	128.88	1.1	1.076	0.93408	cytoplasm	GO:0016043 cellular component organization; GO:0043547 positive regulation of GTPase activity; GO:0016192 vesicle-mediated transport; GO:0043085 positive regulation of catalytic activity; GO:0051234 establishment of localization; GO:0006810 transport; GO:0051336 regulation of hydrolase activity; GO:0051345 positive regulation of hydrolase activity; GO:0050790 regulation of catalytic activity; GO:…	GO:0043226 organelle; GO:0043231 intracellular membrane-bounded organelle; GO:0043229 intracellular organelle; GO:0044464 cell part; GO:0005622 intracellular; GO:0005737 cytoplasm; GO:0012505 endomembrane system; GO:0044424 intracellular part; GO:0043227 membrane-bounded organelle; GO:0005794 Golgi apparatus; GO:0005829 cytosol; GO:0005623 cell; GO:0044444 cytoplasmic part;	GO:0005088 Ras guanyl-nucleotide exchange factor activity; GO:0098772 molecular function regulator; GO:0017112 Rab guanyl-nucleotide exchange factor activity; GO:0005085 guanyl-nucleotide exchange factor activity;	K20308	TRAPPC11; trafficking protein particle complex subunit 11		IPR021773; IPR025876;	Foie gras liver health family 1; Trafficking protein particle complex subunit 11, C-terminal;	S	KOG4386	Uncharacterized conserved protein
Q15427	Splicing factor 3B subunit 4 OS=Homo sapiens OX=9606 GN=SF3B4 PE=1 SV=1	SF3B4	44.385	3.3	0.542	0.0188026	nucleus	GO:0033120 positive regulation of RNA splicing; GO:0050794 regulation of cellular process; GO:0050685 positive regulation of mRNA processing; GO:0006725 cellular aromatic compound metabolic process; GO:0060255 regulation of macromolecule metabolic process; GO:0019219 regulation of nucleobase-containing compound metabolic process; GO:0044237 cellular metabolic process; GO:0071704 organic substance…	GO:0043229 intracellular organelle; GO:0044446 intracellular organelle part; GO:0032991 macromolecular complex; GO:0031981 nuclear lumen; GO:0044424 intracellular part; GO:0005681 spliceosomal complex; GO:0005623 cell; GO:0044422 organelle part; GO:0043226 organelle; GO:0043231 intracellular membrane-bounded organelle; GO:0031974 membrane-enclosed lumen; GO:0005654 nucleoplasm; GO:0005634 nucleus…	GO:0097159 organic cyclic compound binding; GO:1901363 heterocyclic compound binding; GO:0003723 RNA binding; GO:1901265 nucleoside phosphate binding; GO:0005488 binding; GO:0003676 nucleic acid binding; GO:0005515 protein binding; GO:0000166 nucleotide binding; GO:0036094 small molecule binding;	K12831	SF3B4, SAP49; splicing factor 3B subunit 4	hsa03040 Spliceosome - Homo sapiens (human);	IPR034158; IPR000504; IPR012677; IPR034159;	SF3B4, RNA recognition motif 1; RNA recognition motif domain; Nucleotide-binding alpha-beta plait domain; SF3B4, RNA recognition motif 2;	A	KOG0131	Splicing factor 3b, subunit 4
P42765	3-ketoacyl-CoA thiolase, mitochondrial OS=Homo sapiens OX=9606 GN=ACAA2 PE=1 SV=2	ACAA2	41.924	45.3	1.269	0.30444	mitochondria	GO:0010941 regulation of cell death; GO:0065008 regulation of biological quality; GO:0009968 negative regulation of signal transduction; GO:0006066 alcohol metabolic process; GO:0051129 negative regulation of cellular component organization; GO:0023051 regulation of signaling; GO:0006839 mitochondrial transport; GO:0044699 single-organism process; GO:0009058 biosynthetic process; GO:0044255 cellu…	GO:0016020 membrane; GO:0044421 extracellular region part; GO:0031090 organelle membrane; GO:0031982 vesicle; GO:0005737 cytoplasm; GO:0044424 intracellular part; GO:0005623 cell; GO:0044422 organelle part; GO:0005740 mitochondrial envelope; GO:0070062 extracellular exosome; GO:0031974 membrane-enclosed lumen; GO:0070013 intracellular organelle lumen; GO:0044464 cell part; GO:0005622 intracellula…	GO:0097159 organic cyclic compound binding; GO:1901363 heterocyclic compound binding; GO:0003723 RNA binding; GO:0016746 transferase activity, transferring acyl groups; GO:0003824 catalytic activity; GO:0005488 binding; GO:0003676 nucleic acid binding; GO:0003988 acetyl-CoA C-acyltransferase activity; GO:0005515 protein binding; GO:0016408 C-acyltransferase activity; GO:0016747 transferase activi…	K07508	ACAA2; acetyl-CoA acyltransferase 2 [EC:2.3.1.16]	hsa00062 Fatty acid elongation - Homo sapiens (human); hsa00071 Fatty acid degradation - Homo sapiens (human); hsa00280 Valine, leucine and isoleucine degradation - Homo sapiens (human); hsa01100 Metabolic pathways - Homo sapiens (human); hsa01212 Fatty acid metabolism - Homo sapiens (human);	IPR016039; IPR020616; IPR020617;	Thiolase-like; Thiolase, N-terminal; Thiolase, C-terminal;	I	KOG1391	Acetyl-CoA acetyltransferase
Q96LJ7	Dehydrogenase/reductase SDR family member 1 OS=Homo sapiens OX=9606 GN=DHRS1 PE=1 SV=1	DHRS1	33.909	24	1.379	0.028001	extracellular	GO:0044699 single-organism process; GO:0008152 metabolic process; GO:0055114 oxidation-reduction process; GO:0044710 single-organism metabolic process;	GO:0016020 membrane; GO:0043229 intracellular organelle; GO:0005783 endoplasmic reticulum; GO:0044429 mitochondrial part; GO:0031090 organelle membrane; GO:0031967 organelle envelope; GO:0044446 intracellular organelle part; GO:0005737 cytoplasm; GO:0012505 endomembrane system; GO:0044424 intracellular part; GO:0005623 cell; GO:0044422 organelle part; GO:0005739 mitochondrion; GO:0005740 mitochon…	GO:0005515 protein binding; GO:0003824 catalytic activity; GO:0005488 binding; GO:0016491 oxidoreductase activity;	K11163	DHRS1; dehydrogenase/reductase SDR family member 1 [EC:1.1.-.-]		IPR016040;	NAD(P)-binding domain;	R	KOG0725	Reductases with broad range of substrate specificities
Q12929	Epidermal growth factor receptor kinase substrate 8 OS=Homo sapiens OX=9606 GN=EPS8 PE=1 SV=1	EPS8	91.88	17.6	1.164	0.23102	nucleus	GO:0030833 regulation of actin filament polymerization; GO:0044700 single organism signaling; GO:0044085 cellular component biogenesis; GO:0065008 regulation of biological quality; GO:0051674 localization of cell; GO:0030835 negative regulation of actin filament depolymerization; GO:0007166 cell surface receptor signaling pathway; GO:0023051 regulation of signaling; GO:0051129 negative regulation…	GO:0016020 membrane; GO:0044421 extracellular region part; GO:0098862 cluster of actin-based cell projections; GO:0005903 brush border; GO:0005938 cell cortex; GO:0030054 cell junction; GO:0071944 cell periphery; GO:0032587 ruffle membrane; GO:0031982 vesicle; GO:0005737 cytoplasm; GO:0099568 cytoplasmic region; GO:0032991 macromolecular complex; GO:0031224 intrinsic component of membrane; GO:003…	GO:0031267 small GTPase binding; GO:0005070 SH3/SH2 adaptor activity; GO:0017048 Rho GTPase binding; GO:0008092 cytoskeletal protein binding; GO:0030674 protein binding, bridging; GO:0048365 Rac GTPase binding; GO:0035591 signaling adaptor activity; GO:0017016 Ras GTPase binding; GO:0005488 binding; GO:0003779 actin binding; GO:0060090 binding, bridging; GO:0005515 protein binding; GO:0051020 GTP…	K17277	EPS8; epidermal growth factor receptor kinase substrate 8		IPR013625; IPR001452; IPR011993; IPR006020; IPR033928;	Tensin/EPS8 phosphotyrosine-binding domain; SH3 domain; PH domain-like; PTB/PI domain; Epidermal growth factor receptor kinase substrate, phosphotyrosine-binding domain;	T	KOG3557	Epidermal growth factor receptor kinase substrate
P51149	Ras-related protein Rab-7a OS=Homo sapiens OX=9606 GN=RAB7A PE=1 SV=1	RAB7A	23.489	74.9	0.71	0.013717	cytoplasm	GO:0044700 single organism signaling; GO:0044085 cellular component biogenesis; GO:0060627 regulation of vesicle-mediated transport; GO:0065008 regulation of biological quality; GO:0045321 leukocyte activation; GO:1901185 negative regulation of ERBB signaling pathway; GO:0052192 movement in environment of other organism involved in symbiotic interaction; GO:0030641 regulation of cellular pH; GO:0…	GO:0016020 membrane; GO:0044421 extracellular region part; GO:0019898 extrinsic component of membrane; GO:0031090 organelle membrane; GO:0005737 cytoplasm; GO:0044433 cytoplasmic vesicle part; GO:0005623 cell; GO:0044422 organelle part; GO:0043228 non-membrane-bounded organelle; GO:0005765 lysosomal membrane; GO:0070062 extracellular exosome; GO:0031902 late endosome membrane; GO:0005622 intracel…	GO:1901265 nucleoside phosphate binding; GO:0016817 hydrolase activity, acting on acid anhydrides; GO:0016787 hydrolase activity; GO:0005515 protein binding; GO:0097159 organic cyclic compound binding; GO:1901363 heterocyclic compound binding; GO:0016462 pyrophosphatase activity; GO:0019003 GDP binding; GO:0003824 catalytic activity; GO:0032553 ribonucleotide binding; GO:0005488 binding; GO:00039…	K07897	RAB7A; Ras-related protein Rab-7A	hsa04137 Mitophagy - animal - Homo sapiens (human); hsa04140 Autophagy - animal - Homo sapiens (human); hsa04144 Endocytosis - Homo sapiens (human); hsa04145 Phagosome - Homo sapiens (human); hsa05132 Salmonella infection - Homo sapiens (human); hsa05146 Amoebiasis - Homo sapiens (human); hsa05152 Tuberculosis - Homo sapiens (human);	IPR005225; IPR027417;	Small GTP-binding protein domain; P-loop containing nucleoside triphosphate hydrolase;	R	KOG0394	Ras-related GTPase
Q6UWP8	Suprabasin OS=Homo sapiens OX=9606 GN=SBSN PE=1 SV=2	SBSN	60.54	15.3	6.391	0.00090275	extracellular		GO:0031012 extracellular matrix; GO:0070062 extracellular exosome; GO:0043226 organelle; GO:0044421 extracellular region part; GO:0031982 vesicle; GO:1903561 extracellular vesicle; GO:0043227 membrane-bounded organelle; GO:0005576 extracellular region; GO:0043230 extracellular organelle;
Q01995	Transgelin OS=Homo sapiens OX=9606 GN=TAGLN PE=1 SV=4	TAGLN	22.611	76.1	0.846	0.081581	cytoplasm	GO:0032502 developmental process; GO:0060429 epithelium development; GO:0044707 single-multicellular organism process; GO:0009888 tissue development; GO:0048731 system development; GO:0048869 cellular developmental process; GO:0044763 single-organism cellular process; GO:0044699 single-organism process; GO:0032501 multicellular organismal process; GO:0048513 animal organ development; GO:0030154 c…	GO:0044424 intracellular part; GO:0005623 cell; GO:0044464 cell part; GO:0005622 intracellular; GO:0005737 cytoplasm;	GO:0051015 actin filament binding; GO:0008092 cytoskeletal protein binding; GO:0005488 binding; GO:0044877 macromolecular complex binding; GO:0003779 actin binding; GO:0005515 protein binding; GO:0032403 protein complex binding;	K20526	TAGLN; transgelin		IPR001715;	Calponin homology domain;	Z	KOG2046	Calponin
Q86TB9	Protein PAT1 homolog 1 OS=Homo sapiens OX=9606 GN=PATL1 PE=1 SV=2	PATL1	86.849	4.3	2.068	0.0040552	nucleus	GO:0044085 cellular component biogenesis; GO:0016043 cellular component organization; GO:0022613 ribonucleoprotein complex biogenesis; GO:0022618 ribonucleoprotein complex assembly; GO:0006725 cellular aromatic compound metabolic process; GO:0060255 regulation of macromolecule metabolic process; GO:0048519 negative regulation of biological process; GO:0044237 cellular metabolic process; GO:007170…	GO:0000932 P-body; GO:0005737 cytoplasm; GO:0032991 macromolecular complex; GO:0044424 intracellular part; GO:0005623 cell; GO:0016604 nuclear body; GO:0036464 cytoplasmic ribonucleoprotein granule; GO:0044422 organelle part; GO:0043228 non-membrane-bounded organelle; GO:0031974 membrane-enclosed lumen; GO:0005654 nucleoplasm; GO:0016605 PML body; GO:0070013 intracellular organelle lumen; GO:0016…	GO:0097159 organic cyclic compound binding; GO:1901363 heterocyclic compound binding; GO:0003723 RNA binding; GO:0008187 poly-pyrimidine tract binding; GO:0005488 binding; GO:0003676 nucleic acid binding; GO:0005515 protein binding; GO:0070717 poly-purine tract binding; GO:0008266 poly(U) RNA binding; GO:0034046 poly(G) binding; GO:0003727 single-stranded RNA binding;	K12617	PATL1, PAT1; DNA topoisomerase 2-associated protein PAT1	hsa03018 RNA degradation - Homo sapiens (human);			S	KOG4592	Uncharacterized conserved protein
Q4KMP7	TBC1 domain family member 10B OS=Homo sapiens OX=9606 GN=TBC1D10B PE=1 SV=3	TBC1D10B	87.198	8.2	0.901	0.163658	nucleus	GO:0044700 single organism signaling; GO:0050794 regulation of cellular process; GO:0060627 regulation of vesicle-mediated transport; GO:0046907 intracellular transport; GO:0044699 single-organism process; GO:0050896 response to stimulus; GO:0031338 regulation of vesicle fusion; GO:0015031 protein transport; GO:0051234 establishment of localization; GO:0090630 activation of GTPase activity; GO:00…	GO:0016020 membrane; GO:0071944 cell periphery; GO:0044464 cell part; GO:0005622 intracellular; GO:0005737 cytoplasm; GO:0012505 endomembrane system; GO:0044424 intracellular part; GO:0005623 cell; GO:0005829 cytosol; GO:0005886 plasma membrane; GO:0044444 cytoplasmic part;	GO:0031267 small GTPase binding; GO:0004114 3',5'-cyclic-nucleotide phosphodiesterase activity; GO:0004112 cyclic-nucleotide phosphodiesterase activity; GO:0060589 nucleoside-triphosphatase regulator activity; GO:0030695 GTPase regulator activity; GO:0016787 hydrolase activity; GO:0005515 protein binding; GO:0098772 molecular function regulator; GO:0017137 Rab GTPase binding; GO:0030234 enzyme re…	K19944	TBC1D10; TBC1 domain family member 10		IPR002073; IPR000195;	3'5'-cyclic nucleotide phosphodiesterase, catalytic domain; Rab-GTPase-TBC domain;	U	KOG2221	PDZ-domain interacting protein EPI64, contains TBC domain
P11413	Glucose-6-phosphate 1-dehydrogenase OS=Homo sapiens OX=9606 GN=G6PD PE=1 SV=4	G6PD	59.256	61.7	0.7	0.08022	cytoplasm	GO:1904879 positive regulation of calcium ion transmembrane transport via high voltage-gated calcium channel; GO:0021700 developmental maturation; GO:0065008 regulation of biological quality; GO:0010941 regulation of cell death; GO:0006518 peptide metabolic process; GO:0019362 pyridine nucleotide metabolic process; GO:0006066 alcohol metabolic process; GO:0002262 myeloid cell homeostasis; GO:0007…	GO:0043229 intracellular organelle; GO:0016020 membrane; GO:0044421 extracellular region part; GO:0071944 cell periphery; GO:0031982 vesicle; GO:0005737 cytoplasm; GO:0044424 intracellular part; GO:0005829 cytosol; GO:0005623 cell; GO:0005576 extracellular region; GO:0009898 cytoplasmic side of plasma membrane; GO:0098562 cytoplasmic side of membrane; GO:0005886 plasma membrane; GO:0043231 intrac…	GO:1901265 nucleoside phosphate binding; GO:0005536 glucose binding; GO:0046983 protein dimerization activity; GO:0005515 protein binding; GO:0000166 nucleotide binding; GO:0048029 monosaccharide binding; GO:0048037 cofactor binding; GO:0016491 oxidoreductase activity; GO:0097159 organic cyclic compound binding; GO:0016614 oxidoreductase activity, acting on CH-OH group of donors; GO:1901363 heter…	K00036	G6PD, zwf; glucose-6-phosphate 1-dehydrogenase [EC:1.1.1.49 1.1.1.363]	hsa00030 Pentose phosphate pathway - Homo sapiens (human); hsa00480 Glutathione metabolism - Homo sapiens (human); hsa01100 Metabolic pathways - Homo sapiens (human); hsa01200 Carbon metabolism - Homo sapiens (human); hsa05230 Central carbon metabolism in cancer - Homo sapiens (human);	IPR022675; IPR016040; IPR022674;	Glucose-6-phosphate dehydrogenase, C-terminal; NAD(P)-binding domain; Glucose-6-phosphate dehydrogenase, NAD-binding;	G	KOG0563	Glucose-6-phosphate 1-dehydrogenase
P06493	Cyclin-dependent kinase 1 OS=Homo sapiens OX=9606 GN=CDK1 PE=1 SV=3	CDK1	34.095	24.6	1.234	0.039198	cytoplasm	GO:0044700 single organism signaling; GO:0044085 cellular component biogenesis; GO:1902807 negative regulation of cell cycle G1/S phase transition; GO:0010941 regulation of cell death; GO:0014013 regulation of gliogenesis; GO:0022414 reproductive process; GO:0051443 positive regulation of ubiquitin-protein transferase activity; GO:0009891 positive regulation of biosynthetic process; GO:0044237 ce…	GO:0016020 membrane; GO:0000784 nuclear chromosome, telomeric region; GO:0000781 chromosome, telomeric region; GO:0044421 extracellular region part; GO:0005874 microtubule; GO:0061695 transferase complex, transferring phosphorus-containing groups; GO:0031982 vesicle; GO:0005737 cytoplasm; GO:0032991 macromolecular complex; GO:0099512 supramolecular fiber; GO:0044424 intracellular part; GO:1902554…	GO:1901265 nucleoside phosphate binding; GO:0016773 phosphotransferase activity, alcohol group as acceptor; GO:0005515 protein binding; GO:0004693 cyclin-dependent protein serine/threonine kinase activity; GO:0003682 chromatin binding; GO:0004672 protein kinase activity; GO:0030544 Hsp70 protein binding; GO:0030332 cyclin binding; GO:1901363 heterocyclic compound binding; GO:0097159 organic cycli…	K02087	CDK1, CDC2; cyclin-dependent kinase 1 [EC:2.7.11.22 2.7.11.23]	hsa04110 Cell cycle - Homo sapiens (human); hsa04114 Oocyte meiosis - Homo sapiens (human); hsa04115 p53 signaling pathway - Homo sapiens (human); hsa04218 Cellular senescence - Homo sapiens (human); hsa04540 Gap junction - Homo sapiens (human); hsa04914 Progesterone-mediated oocyte maturation - Homo sapiens (human); hsa05170 Human immunodeficiency virus 1 infection - Homo sapiens (human); hsa052…	IPR000719; IPR011009;	Protein kinase domain; Protein kinase-like domain;	R	KOG0594	Protein kinase PCTAIRE and related kinases
Q9BV20	Methylthioribose-1-phosphate isomerase OS=Homo sapiens OX=9606 GN=MRI1 PE=1 SV=1	MRI1	39.149	18.2	1.297	0.00097695	mitochondria	GO:0000097 sulfur amino acid biosynthetic process; GO:0016053 organic acid biosynthetic process; GO:0019509 L-methionine salvage from methylthioadenosine; GO:0009066 aspartate family amino acid metabolic process; GO:0044699 single-organism process; GO:0009058 biosynthetic process; GO:1901566 organonitrogen compound biosynthetic process; GO:0044237 cellular metabolic process; GO:0000096 sulfur ami…	GO:0043229 intracellular organelle; GO:0042995 cell projection; GO:0043232 intracellular non-membrane-bounded organelle; GO:0005737 cytoplasm; GO:0044446 intracellular organelle part; GO:0031981 nuclear lumen; GO:0044452 nucleolar part; GO:0044424 intracellular part; GO:0005730 nucleolus; GO:0005829 cytosol; GO:0005623 cell; GO:0001650 fibrillar center; GO:0044422 organelle part; GO:0043228 non-m…	GO:0016853 isomerase activity; GO:0042802 identical protein binding; GO:0046523 S-methyl-5-thioribose-1-phosphate isomerase activity; GO:0003824 catalytic activity; GO:0005488 binding; GO:0005515 protein binding; GO:0016860 intramolecular oxidoreductase activity; GO:0016861 intramolecular oxidoreductase activity, interconverting aldoses and ketoses;	K08963	mtnA; methylthioribose-1-phosphate isomerase [EC:5.3.1.23]	hsa00270 Cysteine and methionine metabolism - Homo sapiens (human); hsa01100 Metabolic pathways - Homo sapiens (human);	IPR027363;	Methylthioribose-1-phosphate isomerase-like, N-terminal domain;	J	KOG1468	Predicted translation initiation factor related to eIF-2B alpha/beta/delta subunits (CIG2/IDI2)
O15121	Sphingolipid delta(4)-desaturase DES1 OS=Homo sapiens OX=9606 GN=DEGS1 PE=1 SV=1	DEGS1	37.866	5	3.311	0.0149782	plasma membrane	GO:0045321 leukocyte activation; GO:0016053 organic acid biosynthetic process; GO:0006643 membrane lipid metabolic process; GO:0006672 ceramide metabolic process; GO:0044699 single-organism process; GO:0044255 cellular lipid metabolic process; GO:0009058 biosynthetic process; GO:0044237 cellular metabolic process; GO:0051234 establishment of localization; GO:0008610 lipid biosynthetic process; GO…	GO:0016020 membrane; GO:0042175 nuclear outer membrane-endoplasmic reticulum membrane network; GO:0005783 endoplasmic reticulum; GO:0031090 organelle membrane; GO:0031410 cytoplasmic vesicle; GO:0071944 cell periphery; GO:0031982 vesicle; GO:0005737 cytoplasm; GO:0044433 cytoplasmic vesicle part; GO:0031224 intrinsic component of membrane; GO:0044424 intracellular part; GO:0005887 integral compon…	GO:0009055 electron carrier activity; GO:0042284 sphingolipid delta-4 desaturase activity; GO:0016705 oxidoreductase activity, acting on paired donors, with incorporation or reduction of molecular oxygen; GO:0003824 catalytic activity; GO:0016491 oxidoreductase activity;	K04712	DEGS; sphingolipid 4-desaturase/C4-monooxygenase [EC:1.14.19.17 1.14.18.5]	hsa00600 Sphingolipid metabolism - Homo sapiens (human); hsa01100 Metabolic pathways - Homo sapiens (human); hsa04071 Sphingolipid signaling pathway - Homo sapiens (human);	IPR013866; IPR005804;	Sphingolipid delta4-desaturase, N-terminal; Fatty acid desaturase domain;	I	KOG2987	Fatty acid desaturase
Q15437	Protein transport protein Sec23B OS=Homo sapiens OX=9606 GN=SEC23B PE=1 SV=2	SEC23B	86.478	7.8	0.691	0.0146216	cytoplasm,nucleus	GO:0046907 intracellular transport; GO:0016192 vesicle-mediated transport; GO:0048193 Golgi vesicle transport; GO:0071702 organic substance transport; GO:0015031 protein transport; GO:0051641 cellular localization; GO:0051234 establishment of localization; GO:0006810 transport; GO:0045184 establishment of protein localization; GO:0070727 cellular macromolecule localization; GO:0051649 establishme…	GO:0030658 transport vesicle membrane; GO:0016020 membrane; GO:0042175 nuclear outer membrane-endoplasmic reticulum membrane network; GO:0005783 endoplasmic reticulum; GO:0031410 cytoplasmic vesicle; GO:0031090 organelle membrane; GO:0098796 membrane protein complex; GO:0031982 vesicle; GO:0005737 cytoplasm; GO:0044433 cytoplasmic vesicle part; GO:0032991 macromolecular complex; GO:0044424 intrac…	GO:0043169 cation binding; GO:0046872 metal ion binding; GO:0005515 protein binding; GO:0008270 zinc ion binding; GO:0046914 transition metal ion binding; GO:0005488 binding; GO:0043167 ion binding;	K14006	SEC23; protein transport protein SEC23	hsa04141 Protein processing in endoplasmic reticulum - Homo sapiens (human);	IPR006900; IPR012990; IPR006896; IPR029006; IPR006895; IPR007123; IPR002035;	Sec23/Sec24, helical domain; Sec23/Sec24 beta-sandwich; Sec23/Sec24, trunk domain; ADF-H/Gelsolin-like domain; Zinc finger, Sec23/Sec24-type; Gelsolin-like domain; von Willebrand factor, type A;	U	KOG1986	Vesicle coat complex COPII, subunit SEC23
P55036	26S proteasome non-ATPase regulatory subunit 4 OS=Homo sapiens OX=9606 GN=PSMD4 PE=1 SV=1	PSMD4	40.736	30.2	0.942	0.054919	cytoskeleton	GO:0044700 single organism signaling; GO:0044085 cellular component biogenesis; GO:0065008 regulation of biological quality; GO:0032270 positive regulation of cellular protein metabolic process; GO:0002220 innate immune response activating cell surface receptor signaling pathway; GO:0007166 cell surface receptor signaling pathway; GO:0010608 posttranscriptional regulation of gene expression; GO:0…	GO:0043229 intracellular organelle; GO:0000502 proteasome complex; GO:0005838 proteasome regulatory particle; GO:0005737 cytoplasm; GO:0044446 intracellular organelle part; GO:0032991 macromolecular complex; GO:0031981 nuclear lumen; GO:0044424 intracellular part; GO:0005829 cytosol; GO:0005623 cell; GO:0044422 organelle part; GO:0008540 proteasome regulatory particle, base subcomplex; GO:1905369…	GO:0097159 organic cyclic compound binding; GO:1901363 heterocyclic compound binding; GO:0003723 RNA binding; GO:0031593 polyubiquitin binding; GO:0042802 identical protein binding; GO:0005488 binding; GO:0003676 nucleic acid binding; GO:0043130 ubiquitin binding; GO:0005515 protein binding; GO:0032182 ubiquitin-like protein binding;	K03029	PSMD4, RPN10; 26S proteasome regulatory subunit N10	hsa03050 Proteasome - Homo sapiens (human); hsa05169 Epstein-Barr virus infection - Homo sapiens (human);	IPR002035;	von Willebrand factor, type A;	O	KOG2884	26S proteasome regulatory complex, subunit RPN10/PSMD4
Q9BZX2	Uridine-cytidine kinase 2 OS=Homo sapiens OX=9606 GN=UCK2 PE=1 SV=1	UCK2	29.299	5			cytoplasm	GO:0009116 nucleoside metabolic process; GO:0046132 pyrimidine ribonucleoside biosynthetic process; GO:0009147 pyrimidine nucleoside triphosphate metabolic process; GO:0044206 UMP salvage; GO:0009130 pyrimidine nucleoside monophosphate biosynthetic process; GO:0009117 nucleotide metabolic process; GO:0032262 pyrimidine nucleotide salvage; GO:0044699 single-organism process; GO:0009163 nucleoside …	GO:0044464 cell part; GO:0005622 intracellular; GO:0005737 cytoplasm; GO:0044424 intracellular part; GO:0005829 cytosol; GO:0005623 cell; GO:0044444 cytoplasmic part;	GO:0005524 ATP binding; GO:0019206 nucleoside kinase activity; GO:1901265 nucleoside phosphate binding; GO:0019205 nucleobase-containing compound kinase activity; GO:0001882 nucleoside binding; GO:0043167 ion binding; GO:0000166 nucleotide binding; GO:0097159 organic cyclic compound binding; GO:1901363 heterocyclic compound binding; GO:0032549 ribonucleoside binding; GO:0004849 uridine kinase act…	K00876	udk, UCK; uridine kinase [EC:2.7.1.48]	hsa00240 Pyrimidine metabolism - Homo sapiens (human); hsa00983 Drug metabolism - other enzymes - Homo sapiens (human); hsa01100 Metabolic pathways - Homo sapiens (human);	IPR006083; IPR027417;	Phosphoribulokinase/uridine kinase; P-loop containing nucleoside triphosphate hydrolase;
P84243	Histone H3.3 OS=Homo sapiens OX=9606 GN=H3F3A PE=1 SV=2	H3F3A	15.328	25	0.813	0.27394	nucleus	GO:0044085 cellular component biogenesis; GO:0001649 osteoblast differentiation; GO:0007596 blood coagulation; GO:0065008 regulation of biological quality; GO:0022414 reproductive process; GO:0007420 brain development; GO:0007566 embryo implantation; GO:0008584 male gonad development; GO:0044237 cellular metabolic process; GO:0045927 positive regulation of growth; GO:0001558 regulation of cell gr…	GO:0001740 Barr body; GO:0044421 extracellular region part; GO:0000784 nuclear chromosome, telomeric region; GO:0000781 chromosome, telomeric region; GO:0031982 vesicle; GO:0000803 sex chromosome; GO:0032991 macromolecular complex; GO:0044424 intracellular part; GO:0005623 cell; GO:0044422 organelle part; GO:0044427 chromosomal part; GO:0043228 non-membrane-bounded organelle; GO:0070062 extracell…	GO:0042393 histone binding; GO:0003677 DNA binding; GO:0031490 chromatin DNA binding; GO:0046982 protein heterodimerization activity; GO:0001158 enhancer sequence-specific DNA binding; GO:0000976 transcription regulatory region sequence-specific DNA binding; GO:0003690 double-stranded DNA binding; GO:0044877 macromolecular complex binding; GO:0046983 protein dimerization activity; GO:1990837 sequ…	K11253	H3; histone H3	hsa05034 Alcoholism - Homo sapiens (human); hsa05202 Transcriptional misregulation in cancer - Homo sapiens (human); hsa05322 Systemic lupus erythematosus - Homo sapiens (human);	IPR009072; IPR007125;	Histone-fold; Histone H2A/H2B/H3;	B	KOG1745	Histones H3 and H4
Q3ZAQ7	Vacuolar ATPase assembly integral membrane protein VMA21 OS=Homo sapiens OX=9606 GN=VMA21 PE=1 SV=1	VMA21	11.354	11.9	1.796	0.034237	plasma membrane	GO:0044085 cellular component biogenesis; GO:0016043 cellular component organization; GO:0034622 cellular macromolecular complex assembly; GO:0071822 protein complex subunit organization; GO:0070072 vacuolar proton-transporting V-type ATPase complex assembly; GO:0070070 proton-transporting V-type ATPase complex assembly; GO:0043933 macromolecular complex subunit organization; GO:0051336 regulatio…	GO:0030658 transport vesicle membrane; GO:0016020 membrane; GO:0042175 nuclear outer membrane-endoplasmic reticulum membrane network; GO:0005783 endoplasmic reticulum; GO:0031090 organelle membrane; GO:0031410 cytoplasmic vesicle; GO:0098796 membrane protein complex; GO:0031982 vesicle; GO:0005737 cytoplasm; GO:0044433 cytoplasmic vesicle part; GO:0031224 intrinsic component of membrane; GO:00329…							S	KOG4783	Uncharacterized conserved protein
Q9Y2W2	WW domain-binding protein 11 OS=Homo sapiens OX=9606 GN=WBP11 PE=1 SV=1	WBP11	69.997	9.7	1.585	0.00122124	nucleus	GO:0044085 cellular component biogenesis; GO:0022613 ribonucleoprotein complex biogenesis; GO:1903955 positive regulation of protein targeting to mitochondrion; GO:1903533 regulation of protein targeting; GO:0010821 regulation of mitochondrion organization; GO:0044237 cellular metabolic process; GO:1903749 positive regulation of establishment of protein localization to mitochondrion; GO:0051130 p…	GO:0043229 intracellular organelle; GO:0044446 intracellular organelle part; GO:0005737 cytoplasm; GO:0031981 nuclear lumen; GO:0032991 macromolecular complex; GO:0044424 intracellular part; GO:0005681 spliceosomal complex; GO:0016604 nuclear body; GO:0005829 cytosol; GO:0005623 cell; GO:0044422 organelle part; GO:0031974 membrane-enclosed lumen; GO:0043226 organelle; GO:0043231 intracellular mem…	GO:0097159 organic cyclic compound binding; GO:1901363 heterocyclic compound binding; GO:0003677 DNA binding; GO:0003723 RNA binding; GO:0030234 enzyme regulator activity; GO:0019888 protein phosphatase regulator activity; GO:0019208 phosphatase regulator activity; GO:0005488 binding; GO:0003676 nucleic acid binding; GO:0003697 single-stranded DNA binding; GO:0050699 WW domain binding; GO:0005515…	K12866	WBP11, NPWBP; WW domain-binding protein 11	hsa03040 Spliceosome - Homo sapiens (human);			S	KOG4672	Uncharacterized conserved low complexity protein
Q9UBF2	Coatomer subunit gamma-2 OS=Homo sapiens OX=9606 GN=COPG2 PE=1 SV=1	COPG2	97.621	11.6	1.279	0.102625	cytoplasm	GO:0046907 intracellular transport; GO:0006891 intra-Golgi vesicle-mediated transport; GO:0016192 vesicle-mediated transport; GO:0048193 Golgi vesicle transport; GO:0071702 organic substance transport; GO:0015031 protein transport; GO:0051641 cellular localization; GO:0051234 establishment of localization; GO:0006810 transport; GO:0045184 establishment of protein localization; GO:0070727 cellular…	GO:0016020 membrane; GO:0005783 endoplasmic reticulum; GO:0042175 nuclear outer membrane-endoplasmic reticulum membrane network; GO:0031090 organelle membrane; GO:0031410 cytoplasmic vesicle; GO:0098796 membrane protein complex; GO:0030137 COPI-coated vesicle; GO:0030660 Golgi-associated vesicle membrane; GO:0005737 cytoplasm; GO:0031982 vesicle; GO:0044433 cytoplasmic vesicle part; GO:0032991 ma…	GO:0005198 structural molecule activity; GO:0005488 binding;	K17267	COPG; coatomer subunit gamma		IPR013040; IPR011989; IPR002553; IPR032154; IPR016024; IPR015873; IPR009028; IPR013041;	Coatomer, gamma subunit, appendage, Ig-like subdomain; Armadillo-like helical; Clathrin/coatomer adaptor, adaptin-like, N-terminal; Coatomer subunit gamma, C-terminal; Armadillo-type fold; Clathrin alpha-adaptin/coatomer adaptor, appendage, C-terminal subdomain; Coatomer/calthrin adaptor appendage, C-terminal subdomain; Coatomer/clathrin adaptor appendage, Ig-like subdomain;	U	KOG1078	Vesicle coat complex COPI, gamma subunit
Q8N6G6	ADAMTS-like protein 1 OS=Homo sapiens OX=9606 GN=ADAMTSL1 PE=1 SV=4	ADAMTSL1	193.41	1.3	4.991	1.7852e-06	extracellular	GO:0043413 macromolecule glycosylation; GO:0036065 fucosylation; GO:0044267 cellular protein metabolic process; GO:0044699 single-organism process; GO:0009058 biosynthetic process; GO:0044237 cellular metabolic process; GO:0071704 organic substance metabolic process; GO:0008152 metabolic process; GO:1901137 carbohydrate derivative biosynthetic process; GO:1901135 carbohydrate derivative metabolic…	GO:0005788 endoplasmic reticulum lumen; GO:0043229 intracellular organelle; GO:0044421 extracellular region part; GO:0005783 endoplasmic reticulum; GO:0005737 cytoplasm; GO:0044446 intracellular organelle part; GO:0012505 endomembrane system; GO:0044424 intracellular part; GO:0005623 cell; GO:0005576 extracellular region; GO:0044422 organelle part; GO:0031012 extracellular matrix; GO:0043226 orga…	GO:0008233 peptidase activity; GO:0046914 transition metal ion binding; GO:0003824 catalytic activity; GO:0005488 binding; GO:0043167 ion binding; GO:0043169 cation binding; GO:0046872 metal ion binding; GO:0070011 peptidase activity, acting on L-amino acid peptides; GO:0016787 hydrolase activity; GO:0005515 protein binding; GO:0008237 metallopeptidase activity; GO:0008270 zinc ion binding;				IPR003598; IPR007110; IPR013783; IPR003599; IPR010909; IPR013098;	Immunoglobulin subtype 2; Immunoglobulin-like domain; Immunoglobulin-like fold; Immunoglobulin subtype; PLAC; Immunoglobulin I-set;	O	KOG4597	Serine proteinase inhibitor (KU family) with thrombospondin repeats
P62312	U6 snRNA-associated Sm-like protein LSm6 OS=Homo sapiens OX=9606 GN=LSM6 PE=1 SV=1	LSM6	9.1275	11.2	0.778	0.149162	cytoplasm	GO:0044085 cellular component biogenesis; GO:0022613 ribonucleoprotein complex biogenesis; GO:0006725 cellular aromatic compound metabolic process; GO:0060255 regulation of macromolecule metabolic process; GO:0048519 negative regulation of biological process; GO:0044237 cellular metabolic process; GO:0071704 organic substance metabolic process; GO:0044270 cellular nitrogen compound catabolic proc…	GO:0044421 extracellular region part; GO:0031982 vesicle; GO:0005737 cytoplasm; GO:0032991 macromolecular complex; GO:0044424 intracellular part; GO:0005623 cell; GO:0044422 organelle part; GO:0031974 membrane-enclosed lumen; GO:0070062 extracellular exosome; GO:0005654 nucleoplasm; GO:0070013 intracellular organelle lumen; GO:0005622 intracellular; GO:0044464 cell part; GO:1903561 extracellular …	GO:0097159 organic cyclic compound binding; GO:1901363 heterocyclic compound binding; GO:0003723 RNA binding; GO:0005515 protein binding; GO:0005488 binding; GO:0003676 nucleic acid binding;	K12625	LSM6; U6 snRNA-associated Sm-like protein LSm6	hsa03018 RNA degradation - Homo sapiens (human); hsa03040 Spliceosome - Homo sapiens (human);	IPR001163; IPR010920;	LSM domain, eukaryotic/archaea-type; LSM domain;	A	KOG1783	Small nuclear ribonucleoprotein F
Q9NXF1	Testis-expressed protein 10 OS=Homo sapiens OX=9606 GN=TEX10 PE=1 SV=2	TEX10	105.67	4.7	1.855	0.00173654	plasma membrane	GO:0016072 rRNA metabolic process; GO:0006396 RNA processing; GO:0034470 ncRNA processing; GO:0044085 cellular component biogenesis; GO:0022613 ribonucleoprotein complex biogenesis; GO:0006725 cellular aromatic compound metabolic process; GO:0006807 nitrogen compound metabolic process; GO:0042254 ribosome biogenesis; GO:1901360 organic cyclic compound metabolic process; GO:0044238 primary metabol…	GO:0016020 membrane; GO:0031090 organelle membrane; GO:0005737 cytoplasm; GO:0031224 intrinsic component of membrane; GO:0032991 macromolecular complex; GO:0044424 intracellular part; GO:0005623 cell; GO:0097344 Rix1 complex; GO:0044422 organelle part; GO:0043228 non-membrane-bounded organelle; GO:0031974 membrane-enclosed lumen; GO:1902494 catalytic complex; GO:0005654 nucleoplasm; GO:0031965 nu…	GO:0005515 protein binding; GO:0005488 binding;	K14827	IPI1, TEX10; pre-rRNA-processing protein IPI1		IPR011989; IPR016024;	Armadillo-like helical; Armadillo-type fold;	S	KOG2149	Uncharacterized conserved protein
P06756	Integrin alpha-V OS=Homo sapiens OX=9606 GN=ITGAV PE=1 SV=2	ITGAV	116.04	19.5	0.868	0.032997	plasma membrane	GO:0044700 single organism signaling; GO:0044409 entry into host; GO:0010941 regulation of cell death; GO:0052370 entry of organism into cell of other organism by promotion of phagocytosis in other organism involved in symbiotic interaction; GO:0044237 cellular metabolic process; GO:0007492 endoderm development; GO:0008152 metabolic process; GO:0001525 angiogenesis; GO:0055065 metal ion homeostas…	GO:0016020 membrane; GO:0044421 extracellular region part; GO:0009897 external side of plasma membrane; GO:0031090 organelle membrane; GO:0032587 ruffle membrane; GO:0005737 cytoplasm; GO:0044433 cytoplasmic vesicle part; GO:0032991 macromolecular complex; GO:0034683 integrin alphav-beta3 complex; GO:0005887 integral component of plasma membrane; GO:0098858 actin-based cell projection; GO:0005623…	GO:0005102 receptor binding; GO:0019838 growth factor binding; GO:0001846 opsonin binding; GO:0015026 coreceptor activity; GO:0019901 protein kinase binding; GO:0022803 passive transmembrane transporter activity; GO:0022892 substrate-specific transporter activity; GO:0005515 protein binding; GO:0004871 signal transducer activity; GO:0050840 extracellular matrix binding; GO:0015267 channel activit…	K06487	ITGAV, CD51; integrin alpha V	hsa04145 Phagosome - Homo sapiens (human); hsa04151 PI3K-Akt signaling pathway - Homo sapiens (human); hsa04510 Focal adhesion - Homo sapiens (human); hsa04512 ECM-receptor interaction - Homo sapiens (human); hsa04514 Cell adhesion molecules (CAMs) - Homo sapiens (human); hsa04810 Regulation of actin cytoskeleton - Homo sapiens (human); hsa04919 Thyroid hormone signaling pathway - Homo sapiens (h…	IPR032695; IPR013649;	Integrin domain; Integrin alpha-2;
Q8NBQ5	Estradiol 17-beta-dehydrogenase 11 OS=Homo sapiens OX=9606 GN=HSD17B11 PE=1 SV=3	HSD17B11	32.935	15	0.64	0.0178045	endoplasmic reticulum	GO:0042446 hormone biosynthetic process; GO:0065008 regulation of biological quality; GO:0006710 androgen catabolic process; GO:0044699 single-organism process; GO:0009058 biosynthetic process; GO:0006703 estrogen biosynthetic process; GO:0044237 cellular metabolic process; GO:0071704 organic substance metabolic process; GO:0008610 lipid biosynthetic process; GO:0008209 androgen metabolic process…	GO:0043226 organelle; GO:0043229 intracellular organelle; GO:0043232 intracellular non-membrane-bounded organelle; GO:0044464 cell part; GO:0005622 intracellular; GO:0005737 cytoplasm; GO:0044424 intracellular part; GO:0005829 cytosol; GO:0005811 lipid particle; GO:0005623 cell; GO:0005576 extracellular region; GO:0044444 cytoplasmic part; GO:0043228 non-membrane-bounded organelle;	GO:0016614 oxidoreductase activity, acting on CH-OH group of donors; GO:0016229 steroid dehydrogenase activity; GO:0016616 oxidoreductase activity, acting on the CH-OH group of donors, NAD or NADP as acceptor; GO:0004303 estradiol 17-beta-dehydrogenase activity; GO:0033764 steroid dehydrogenase activity, acting on the CH-OH group of donors, NAD or NADP as acceptor; GO:0003824 catalytic activity; …				IPR016040;	NAD(P)-binding domain;	Q	KOG1201	Hydroxysteroid 17-beta dehydrogenase 11
P55735	Protein SEC13 homolog OS=Homo sapiens OX=9606 GN=SEC13 PE=1 SV=3	SEC13	35.54	42.2	0.983	0.81896	cytoskeleton	GO:0050658 RNA transport; GO:0044085 cellular component biogenesis; GO:0006901 vesicle coating; GO:0048207 vesicle targeting, rough ER to cis-Golgi; GO:0048208 COPII vesicle coating; GO:0023051 regulation of signaling; GO:1902533 positive regulation of intracellular signal transduction; GO:0044699 single-organism process; GO:0015031 protein transport; GO:0051234 establishment of localization; GO:…	GO:0030658 transport vesicle membrane; GO:0016020 membrane; GO:0042175 nuclear outer membrane-endoplasmic reticulum membrane network; GO:0044421 extracellular region part; GO:0005783 endoplasmic reticulum; GO:0031090 organelle membrane; GO:0031410 cytoplasmic vesicle; GO:0031982 vesicle; GO:0005737 cytoplasm; GO:0044433 cytoplasmic vesicle part; GO:0032991 macromolecular complex; GO:0044424 intra…	GO:0005515 protein binding; GO:0042802 identical protein binding; GO:0005488 binding;	K14004	SEC13; protein transport protein SEC13	hsa03013 RNA transport - Homo sapiens (human); hsa04141 Protein processing in endoplasmic reticulum - Homo sapiens (human); hsa04150 mTOR signaling pathway - Homo sapiens (human);	IPR017986; IPR015943;	WD40-repeat-containing domain; WD40/YVTN repeat-like-containing domain;	U	KOG1332	Vesicle coat complex COPII, subunit SEC13
Q9BYB4	Guanine nucleotide-binding protein subunit beta-like protein 1 OS=Homo sapiens OX=9606 GN=GNB1L PE=1 SV=2	GNB1L	35.618	8.3	1.858	2.342e-05	cytoplasm	GO:0050794 regulation of cellular process; GO:0044700 single organism signaling; GO:0051716 cellular response to stimulus; GO:0035556 intracellular signal transduction; GO:0044699 single-organism process; GO:0023052 signaling; GO:0050896 response to stimulus; GO:0051704 multi-organism process; GO:0007186 G-protein coupled receptor signaling pathway; GO:0007610 behavior; GO:0007165 signal transduc…	GO:0016020 membrane; GO:0044459 plasma membrane part; GO:0005622 intracellular; GO:0044425 membrane part; GO:0044464 cell part; GO:0071944 cell periphery; GO:0005737 cytoplasm; GO:0044424 intracellular part; GO:0005623 cell; GO:0009898 cytoplasmic side of plasma membrane; GO:0098562 cytoplasmic side of membrane; GO:0005886 plasma membrane; GO:0098552 side of membrane;	GO:0005515 protein binding; GO:0005488 binding;				IPR017986; IPR015943;	WD40-repeat-containing domain; WD40/YVTN repeat-like-containing domain;	R	KOG0322	G-protein beta subunit-like protein GNB1L, contains WD repeats
Q5KU26	Collectin-12 OS=Homo sapiens OX=9606 GN=COLEC12 PE=1 SV=3	COLEC12	81.514	21.8	0.747	0.0052361	plasma membrane	GO:0044700 single organism signaling; GO:0044085 cellular component biogenesis; GO:0044699 single-organism process; GO:0031347 regulation of defense response; GO:0051234 establishment of localization; GO:0006909 phagocytosis; GO:0007165 signal transduction; GO:0007154 cell communication; GO:0045088 regulation of innate immune response; GO:0022607 cellular component assembly; GO:0065003 macromolec…	GO:0016020 membrane; GO:0044421 extracellular region part; GO:0031090 organelle membrane; GO:0031410 cytoplasmic vesicle; GO:0071944 cell periphery; GO:0031982 vesicle; GO:0005737 cytoplasm; GO:0044433 cytoplasmic vesicle part; GO:0032991 macromolecular complex; GO:0031224 intrinsic component of membrane; GO:0044424 intracellular part; GO:0005623 cell; GO:0005581 collagen trimer; GO:0044422 organ…	GO:0038023 signaling receptor activity; GO:0043167 ion binding; GO:0044877 macromolecular complex binding; GO:0038024 cargo receptor activity; GO:0005044 scavenger receptor activity; GO:0071813 lipoprotein particle binding; GO:0048029 monosaccharide binding; GO:0004871 signal transducer activity; GO:0060089 molecular transducer activity; GO:0004872 receptor activity; GO:0030169 low-density lipopr…	K10062	COLEC12; collectin sub-family member 12	hsa04145 Phagosome - Homo sapiens (human);	IPR001304; IPR016187; IPR033989; IPR016186;	C-type lectin-like; C-type lectin fold; CD209-like, C-type lectin-like domain; C-type lectin-like/link domain;
Q16254	Transcription factor E2F4 OS=Homo sapiens OX=9606 GN=E2F4 PE=1 SV=2	E2F4	43.96	3.1			nucleus	GO:0044700 single organism signaling; GO:0044085 cellular component biogenesis; GO:1902807 negative regulation of cell cycle G1/S phase transition; GO:0065008 regulation of biological quality; GO:0097659 nucleic acid-templated transcription; GO:0009891 positive regulation of biosynthetic process; GO:0060271 cilium assembly; GO:0010564 regulation of cell cycle process; GO:0044237 cellular metaboli…	GO:0043229 intracellular organelle; GO:0043232 intracellular non-membrane-bounded organelle; GO:0044446 intracellular organelle part; GO:0032991 macromolecular complex; GO:0031981 nuclear lumen; GO:0044424 intracellular part; GO:0005667 transcription factor complex; GO:0005623 cell; GO:0044422 organelle part; GO:0044427 chromosomal part; GO:0043228 non-membrane-bounded organelle; GO:0043226 organ…	GO:0003677 DNA binding; GO:0000981 RNA polymerase II transcription factor activity, sequence-specific DNA binding; GO:0001228 transcriptional activator activity, RNA polymerase II transcription regulatory region sequence-specific binding; GO:0000976 transcription regulatory region sequence-specific DNA binding; GO:0001077 transcriptional activator activity, RNA polymerase II core promoter proxima…	K04682	E2F4_5; transcription factor E2F4/5	hsa04110 Cell cycle - Homo sapiens (human); hsa04218 Cellular senescence - Homo sapiens (human); hsa04350 TGF-beta signaling pathway - Homo sapiens (human);	IPR003316; IPR011991; IPR032198;	E2F/DP family, winged-helix DNA-binding domain; Winged helix-turn-helix DNA-binding domain; E2F transcription factor, CC-MB domain;	K	KOG2577	Transcription factor E2F/dimerization partner (TDP)
Q9BPX6	Calcium uptake protein 1, mitochondrial OS=Homo sapiens OX=9606 GN=MICU1 PE=1 SV=1	MICU1	54.351	14.7	0.959	0.65154	mitochondria	GO:0044085 cellular component biogenesis; GO:0016043 cellular component organization; GO:0065008 regulation of biological quality; GO:0034220 ion transmembrane transport; GO:0072511 divalent inorganic cation transport; GO:0072503 cellular divalent inorganic cation homeostasis; GO:0051260 protein homooligomerization; GO:0030001 metal ion transport; GO:0006839 mitochondrial transport; GO:0030003 ce…	GO:0016020 membrane; GO:0031090 organelle membrane; GO:0005737 cytoplasm; GO:0031224 intrinsic component of membrane; GO:0032991 macromolecular complex; GO:0044424 intracellular part; GO:0044455 mitochondrial membrane part; GO:0005623 cell; GO:0044422 organelle part; GO:0031974 membrane-enclosed lumen; GO:0005740 mitochondrial envelope; GO:0031301 integral component of organelle membrane; GO:0070…	GO:0042802 identical protein binding; GO:0046982 protein heterodimerization activity; GO:0005488 binding; GO:0043167 ion binding; GO:0046983 protein dimerization activity; GO:0043169 cation binding; GO:0046872 metal ion binding; GO:0005515 protein binding; GO:0005509 calcium ion binding;	K22827			IPR011992; IPR002048;	EF-hand domain pair; EF-hand domain;	P	KOG2643	Ca2+ binding protein, contains EF-hand motifs
O43852	Calumenin OS=Homo sapiens OX=9606 GN=CALU PE=1 SV=2	CALU	37.106	65.1	0.68	0.0053755	extracellular		GO:0016020 membrane; GO:0042175 nuclear outer membrane-endoplasmic reticulum membrane network; GO:0005783 endoplasmic reticulum; GO:0031410 cytoplasmic vesicle; GO:0031982 vesicle; GO:0005737 cytoplasm; GO:0044424 intracellular part; GO:0033018 sarcoplasmic reticulum lumen; GO:0016528 sarcoplasm; GO:0005623 cell; GO:0044422 organelle part; GO:0048770 pigment granule; GO:0031974 membrane-enclosed …	GO:0046872 metal ion binding; GO:0043169 cation binding; GO:0005515 protein binding; GO:0005509 calcium ion binding; GO:0005488 binding; GO:0043167 ion binding;				IPR002048; IPR011992;	EF-hand domain; EF-hand domain pair;	TU	KOG4223	Reticulocalbin, calumenin, DNA supercoiling factor, and related Ca2+-binding proteins of the CREC family (EF-Hand protein superfamily)
P53041	Serine/threonine-protein phosphatase 5 OS=Homo sapiens OX=9606 GN=PPP5C PE=1 SV=1	PPP5C	56.878	22.6	0.707	0.0069021	cytoplasm	GO:0044700 single organism signaling; GO:0044085 cellular component biogenesis; GO:0010941 regulation of cell death; GO:0097659 nucleic acid-templated transcription; GO:0044237 cellular metabolic process; GO:0008152 metabolic process; GO:2000322 regulation of glucocorticoid receptor signaling pathway; GO:0065003 macromolecular complex assembly; GO:0043122 regulation of I-kappaB kinase/NF-kappaB s…	GO:0030425 dendrite; GO:0016020 membrane; GO:0071944 cell periphery; GO:0005737 cytoplasm; GO:0043025 neuronal cell body; GO:0032991 macromolecular complex; GO:0044424 intracellular part; GO:1990635 proximal dendrite; GO:0005623 cell; GO:0044422 organelle part; GO:0031974 membrane-enclosed lumen; GO:0005654 nucleoplasm; GO:0070013 intracellular organelle lumen; GO:0044464 cell part; GO:0005622 in…	GO:1901265 nucleoside phosphate binding; GO:0004722 protein serine/threonine phosphatase activity; GO:0016791 phosphatase activity; GO:0016787 hydrolase activity; GO:0005515 protein binding; GO:0004721 phosphoprotein phosphatase activity; GO:0004871 signal transducer activity; GO:1901363 heterocyclic compound binding; GO:0097159 organic cyclic compound binding; GO:0042802 identical protein bindin…	K04460	PPP5C; serine/threonine-protein phosphatase 5 [EC:3.1.3.16]	hsa04010 MAPK signaling pathway - Homo sapiens (human);	IPR029052; IPR004843; IPR013235; IPR011990; IPR013026; IPR006186;	Metallo-dependent phosphatase-like; Calcineurin-like phosphoesterase domain, ApaH type; PPP domain; Tetratricopeptide-like helical domain; Tetratricopeptide repeat-containing domain; Serine/threonine-specific protein phosphatase/bis(5-nucleosyl)-tetraphosphatase;	R	KOG0376	Serine-threonine phosphatase 2A, catalytic subunit
P35443	Thrombospondin-4 OS=Homo sapiens OX=9606 GN=THBS4 PE=1 SV=2	THBS4	105.87	7.1	18.143	2.8082e-06	extracellular	GO:0051093 negative regulation of developmental process; GO:0030335 positive regulation of cell migration; GO:0032270 positive regulation of cellular protein metabolic process; GO:0051674 localization of cell; GO:0040017 positive regulation of locomotion; GO:0071603 endothelial cell-cell adhesion; GO:0051241 negative regulation of multicellular organismal process; GO:0044699 single-organism proce…	GO:0043229 intracellular organelle; GO:0005615 extracellular space; GO:0044421 extracellular region part; GO:0005783 endoplasmic reticulum; GO:0031982 vesicle; GO:0005737 cytoplasm; GO:0016529 sarcoplasmic reticulum; GO:0012505 endomembrane system; GO:0044424 intracellular part; GO:0016528 sarcoplasm; GO:0005623 cell; GO:0044420 extracellular matrix component; GO:0005576 extracellular region; GO:…	GO:0008083 growth factor activity; GO:0005102 receptor binding; GO:0043167 ion binding; GO:0044877 macromolecular complex binding; GO:0005515 protein binding; GO:0005178 integrin binding; GO:0008201 heparin binding; GO:1901681 sulfur compound binding; GO:0050839 cell adhesion molecule binding; GO:0097367 carbohydrate derivative binding; GO:0005488 binding; GO:0046872 metal ion binding; GO:0043169…	K04659	THBS2S; thrombospondin 2/3/4/5	hsa04145 Phagosome - Homo sapiens (human); hsa04151 PI3K-Akt signaling pathway - Homo sapiens (human); hsa04510 Focal adhesion - Homo sapiens (human); hsa04512 ECM-receptor interaction - Homo sapiens (human); hsa05144 Malaria - Homo sapiens (human); hsa05165 Human papillomavirus infection - Homo sapiens (human);	IPR024665; IPR008859; IPR001881; IPR000742; IPR001791; IPR013320;	Thrombospondin/cartilage oligomeric matrix protein, coiled-coil domain; Thrombospondin, C-terminal; EGF-like calcium-binding domain; EGF-like domain; Laminin G domain; Concanavalin A-like lectin/glucanase domain;
Q08431	Lactadherin OS=Homo sapiens OX=9606 GN=MFGE8 PE=1 SV=3	MFGE8	43.104	57.1	12.001	8.1616e-08	extracellular	GO:0060627 regulation of vesicle-mediated transport; GO:2000425 regulation of apoptotic cell clearance; GO:0001568 blood vessel development; GO:0022414 reproductive process; GO:0044699 single-organism process; GO:0044764 multi-organism cellular process; GO:0044237 cellular metabolic process; GO:0051234 establishment of localization; GO:0006909 phagocytosis; GO:0051130 positive regulation of cellu…	GO:0016020 membrane; GO:0005615 extracellular space; GO:0044421 extracellular region part; GO:0009897 external side of plasma membrane; GO:0019898 extrinsic component of membrane; GO:0071944 cell periphery; GO:0031982 vesicle; GO:0019897 extrinsic component of plasma membrane; GO:0005623 cell; GO:0005576 extracellular region; GO:0005886 plasma membrane; GO:0070062 extracellular exosome; GO:004322…	GO:0050839 cell adhesion molecule binding; GO:0072341 modified amino acid binding; GO:0005102 receptor binding; GO:0005488 binding; GO:0005543 phospholipid binding; GO:0043167 ion binding; GO:0044877 macromolecular complex binding; GO:0008289 lipid binding; GO:0043168 anion binding; GO:0005515 protein binding; GO:0005178 integrin binding; GO:0008429 phosphatidylethanolamine binding; GO:0001786 ph…	K17253	MFGE8; lactadherin		IPR000421; IPR000742; IPR008979;	Coagulation factor 5/8 C-terminal domain; EGF-like domain; Galactose-binding domain-like;
Q96L58	Beta-1,3-galactosyltransferase 6 OS=Homo sapiens OX=9606 GN=B3GALT6 PE=1 SV=2	B3GALT6	37.137	6.7	1.412	0.0072395	mitochondria	GO:0030201 heparan sulfate proteoglycan metabolic process; GO:0043413 macromolecule glycosylation; GO:0030206 chondroitin sulfate biosynthetic process; GO:0006024 glycosaminoglycan biosynthetic process; GO:0044267 cellular protein metabolic process; GO:0044699 single-organism process; GO:0009058 biosynthetic process; GO:1901566 organonitrogen compound biosynthetic process; GO:0044237 cellular met…	GO:0043229 intracellular organelle; GO:0016020 membrane; GO:0032580 Golgi cisterna membrane; GO:0098588 bounding membrane of organelle; GO:0031090 organelle membrane; GO:0005737 cytoplasm; GO:0044446 intracellular organelle part; GO:0005797 Golgi medial cisterna; GO:0000139 Golgi membrane; GO:0031224 intrinsic component of membrane; GO:0012505 endomembrane system; GO:0005795 Golgi stack; GO:00444…	GO:0048531 beta-1,3-galactosyltransferase activity; GO:0035250 UDP-galactosyltransferase activity; GO:0016758 transferase activity, transferring hexosyl groups; GO:0003824 catalytic activity; GO:0008378 galactosyltransferase activity; GO:0008499 UDP-galactose:beta-N-acetylglucosamine beta-1,3-galactosyltransferase activity; GO:0008194 UDP-glycosyltransferase activity; GO:0016757 transferase activ…	K00734	B3GALT6; galactosylxylosylprotein 3-beta-galactosyltransferase [EC:2.4.1.134]	hsa00532 Glycosaminoglycan biosynthesis - chondroitin sulfate / dermatan sulfate - Homo sapiens (human); hsa00534 Glycosaminoglycan biosynthesis - heparan sulfate / heparin - Homo sapiens (human); hsa01100 Metabolic pathways - Homo sapiens (human);			G	KOG2288	Galactosyltransferases
Q8N806	Putative E3 ubiquitin-protein ligase UBR7 OS=Homo sapiens OX=9606 GN=UBR7 PE=1 SV=2	UBR7	47.998	15.1	0.586	0.0045994	cytoplasm,nucleus	GO:0008152 metabolic process; GO:0032446 protein modification by small protein conjugation; GO:0016567 protein ubiquitination; GO:0044260 cellular macromolecule metabolic process; GO:0044267 cellular protein metabolic process; GO:0006464 cellular protein modification process; GO:0043170 macromolecule metabolic process; GO:0019538 protein metabolic process; GO:0070647 protein modification by small…		GO:0046914 transition metal ion binding; GO:0003824 catalytic activity; GO:0005488 binding; GO:0043167 ion binding; GO:0043169 cation binding; GO:0046872 metal ion binding; GO:0008270 zinc ion binding; GO:0016740 transferase activity;	K11979	UBR7; E3 ubiquitin-protein ligase UBR7 [EC:2.3.2.27]		IPR013083; IPR011011; IPR003126;	Zinc finger, RING/FYVE/PHD-type; Zinc finger, FYVE/PHD-type; Zinc finger, UBR-type;	R	KOG2752	Uncharacterized conserved protein, contains N-recognin-type Zn-finger
Q92522	Histone H1x OS=Homo sapiens OX=9606 GN=H1FX PE=1 SV=1	H1FX	22.487	26.3	0.89	0.02126	nucleus	GO:0044085 cellular component biogenesis; GO:0016043 cellular component organization; GO:0034728 nucleosome organization; GO:0034622 cellular macromolecular complex assembly; GO:0006333 chromatin assembly or disassembly; GO:0043933 macromolecular complex subunit organization; GO:0065004 protein-DNA complex assembly; GO:0006323 DNA packaging; GO:0006334 nucleosome assembly; GO:0051276 chromosome o…	GO:0043229 intracellular organelle; GO:0043232 intracellular non-membrane-bounded organelle; GO:0044446 intracellular organelle part; GO:0032991 macromolecular complex; GO:0031981 nuclear lumen; GO:0044424 intracellular part; GO:0005730 nucleolus; GO:0005623 cell; GO:0044422 organelle part; GO:0044427 chromosomal part; GO:0000786 nucleosome; GO:0043228 non-membrane-bounded organelle; GO:0043231 i…	GO:0097159 organic cyclic compound binding; GO:1901363 heterocyclic compound binding; GO:0050839 cell adhesion molecule binding; GO:0003677 DNA binding; GO:0003723 RNA binding; GO:0005488 binding; GO:0045296 cadherin binding; GO:0003676 nucleic acid binding; GO:0005515 protein binding;	K11275	H1_5; histone H1/5		IPR011991; IPR005818;	Winged helix-turn-helix DNA-binding domain; Linker histone H1/H5, domain H15;	B	KOG4012	Histone H1
Q9P003	Protein cornichon homolog 4 OS=Homo sapiens OX=9606 GN=CNIH4 PE=1 SV=1	CNIH4	16.093	14.4	2.101	0.0026586	plasma membrane	GO:0045184 establishment of protein localization; GO:0006810 transport; GO:0046907 intracellular transport; GO:0051649 establishment of localization in cell; GO:0016192 vesicle-mediated transport; GO:0048193 Golgi vesicle transport; GO:0071702 organic substance transport; GO:0008104 protein localization; GO:0033036 macromolecule localization; GO:0051179 localization; GO:0006888 ER to Golgi vesicl…	GO:0043229 intracellular organelle; GO:0016020 membrane; GO:0005783 endoplasmic reticulum; GO:0005737 cytoplasm; GO:0031224 intrinsic component of membrane; GO:0012505 endomembrane system; GO:0044424 intracellular part; GO:0005623 cell; GO:0016021 integral component of membrane; GO:0043231 intracellular membrane-bounded organelle; GO:0043226 organelle; GO:0044425 membrane part; GO:0005622 intrace…	GO:0005102 receptor binding; GO:0048020 CCR chemokine receptor binding; GO:0005488 binding; GO:0042379 chemokine receptor binding; GO:0005126 cytokine receptor binding; GO:0005515 protein binding; GO:0001664 G-protein coupled receptor binding; GO:0031730 CCR5 chemokine receptor binding;	K20368	CNIH, ERV14; protein cornichon				OUT	KOG2729	ER vesicle integral membrane protein involved in establishing cell polarity, signaling and protein degradation
Q01581	Hydroxymethylglutaryl-CoA synthase, cytoplasmic OS=Homo sapiens OX=9606 GN=HMGCS1 PE=1 SV=2	HMGCS1	57.293	7.3	2.364	0.00051676	cytoplasm	GO:0048732 gland development; GO:0022414 reproductive process; GO:0006066 alcohol metabolic process; GO:0007420 brain development; GO:0008584 male gonad development; GO:0044699 single-organism process; GO:0044255 cellular lipid metabolic process; GO:0009058 biosynthetic process; GO:0033197 response to vitamin E; GO:0044237 cellular metabolic process; GO:0008610 lipid biosynthetic process; GO:0008…	GO:0044464 cell part; GO:0005622 intracellular; GO:0005737 cytoplasm; GO:0044424 intracellular part; GO:0005623 cell; GO:0005829 cytosol; GO:0044444 cytoplasmic part;	GO:0004421 hydroxymethylglutaryl-CoA synthase activity; GO:0016746 transferase activity, transferring acyl groups; GO:0042802 identical protein binding; GO:0016853 isomerase activity; GO:0003824 catalytic activity; GO:0046912 transferase activity, transferring acyl groups, acyl groups converted into alkyl on transfer; GO:0042803 protein homodimerization activity; GO:0005488 binding; GO:0046983 pr…	K01641	E2.3.3.10; hydroxymethylglutaryl-CoA synthase [EC:2.3.3.10]	hsa00072 Synthesis and degradation of ketone bodies - Homo sapiens (human); hsa00280 Valine, leucine and isoleucine degradation - Homo sapiens (human); hsa00650 Butanoate metabolism - Homo sapiens (human); hsa00900 Terpenoid backbone biosynthesis - Homo sapiens (human); hsa01100 Metabolic pathways - Homo sapiens (human); hsa03320 PPAR signaling pathway - Homo sapiens (human);	IPR013746; IPR016039; IPR013528;	Hydroxymethylglutaryl-coenzyme A synthase C-terminal domain; Thiolase-like; Hydroxymethylglutaryl-coenzyme A synthase, N-terminal;	I	KOG1393	Hydroxymethylglutaryl-CoA synthase
O15431	High affinity copper uptake protein 1 OS=Homo sapiens OX=9606 GN=SLC31A1 PE=1 SV=1	SLC31A1	21.09	10			plasma membrane	GO:0065008 regulation of biological quality; GO:0034220 ion transmembrane transport; GO:0055076 transition metal ion homeostasis; GO:0072718 response to cisplatin; GO:0030001 metal ion transport; GO:0030003 cellular cation homeostasis; GO:0035434 copper ion transmembrane transport; GO:0044699 single-organism process; GO:0050896 response to stimulus; GO:1902861 copper ion import into cell; GO:0055…	GO:0097708 intracellular vesicle; GO:0043229 intracellular organelle; GO:0016020 membrane; GO:0031226 intrinsic component of plasma membrane; GO:0005770 late endosome; GO:0031410 cytoplasmic vesicle; GO:0071944 cell periphery; GO:0005737 cytoplasm; GO:0031982 vesicle; GO:0043025 neuronal cell body; GO:0031224 intrinsic component of membrane; GO:0012505 endomembrane system; GO:0044424 intracellula…	GO:0046873 metal ion transmembrane transporter activity; GO:0015075 ion transmembrane transporter activity; GO:0015088 copper uptake transmembrane transporter activity; GO:0005375 copper ion transmembrane transporter activity; GO:0022892 substrate-specific transporter activity; GO:0046915 transition metal ion transmembrane transporter activity; GO:0022890 inorganic cation transmembrane transporte…	K14686	SLC31A1, CTR1; solute carrier family 31 (copper transporter), member 1	hsa01524 Platinum drug resistance - Homo sapiens (human); hsa04978 Mineral absorption - Homo sapiens (human);			P	KOG3386	Copper transporter
Q9ULC4	Malignant T-cell-amplified sequence 1 OS=Homo sapiens OX=9606 GN=MCTS1 PE=1 SV=1	MCTS1	20.555	29.3	1.182	0.31872	cytoplasm	GO:0044085 cellular component biogenesis; GO:0022613 ribonucleoprotein complex biogenesis; GO:0006518 peptide metabolic process; GO:0022618 ribonucleoprotein complex assembly; GO:0097659 nucleic acid-templated transcription; GO:0044699 single-organism process; GO:1903008 organelle disassembly; GO:0009058 biosynthetic process; GO:0044237 cellular metabolic process; GO:2001141 regulation of RNA bio…	GO:0016020 membrane; GO:0071944 cell periphery; GO:0044464 cell part; GO:0005622 intracellular; GO:0005737 cytoplasm; GO:0044424 intracellular part; GO:0005623 cell; GO:0005829 cytosol; GO:0005886 plasma membrane; GO:0044444 cytoplasmic part;	GO:0097159 organic cyclic compound binding; GO:1901363 heterocyclic compound binding; GO:0008135 translation factor activity, RNA binding; GO:0003723 RNA binding; GO:0005488 binding; GO:0003676 nucleic acid binding; GO:0003743 translation initiation factor activity; GO:0005515 protein binding;	K07575	K07575; PUA domain protein		IPR015947; IPR002478; IPR004521;	PUA-like domain; PUA domain; Uncharacterised domain CHP00451;	J	KOG2523	Predicted RNA-binding protein with PUA domain
P05198	Eukaryotic translation initiation factor 2 subunit 1 OS=Homo sapiens OX=9606 GN=EIF2S1 PE=1 SV=3	EIF2S1	36.112	52.4	0.819	0.080322	cytoplasm	GO:0044700 single organism signaling; GO:0010941 regulation of cell death; GO:0006518 peptide metabolic process; GO:0010608 posttranscriptional regulation of gene expression; GO:0034644 cellular response to UV; GO:0043555 regulation of translation in response to stress; GO:0044237 cellular metabolic process; GO:0009605 response to external stimulus; GO:0008152 metabolic process; GO:0035966 respon…	GO:0016020 membrane; GO:0044421 extracellular region part; GO:0005850 eukaryotic translation initiation factor 2 complex; GO:0031982 vesicle; GO:0005737 cytoplasm; GO:0032991 macromolecular complex; GO:0044424 intracellular part; GO:0005623 cell; GO:0044207 translation initiation ternary complex; GO:0097386 glial cell projection; GO:0036464 cytoplasmic ribonucleoprotein granule; GO:0043228 non-me…	GO:0043022 ribosome binding; GO:0097159 organic cyclic compound binding; GO:1901363 heterocyclic compound binding; GO:0003723 RNA binding; GO:0008135 translation factor activity, RNA binding; GO:0005488 binding; GO:0044877 macromolecular complex binding; GO:0003676 nucleic acid binding; GO:0003743 translation initiation factor activity; GO:0005515 protein binding; GO:0043021 ribonucleoprotein com…	K03237	EIF2S1; translation initiation factor 2 subunit 1	hsa03013 RNA transport - Homo sapiens (human); hsa04140 Autophagy - animal - Homo sapiens (human); hsa04141 Protein processing in endoplasmic reticulum - Homo sapiens (human); hsa04210 Apoptosis - Homo sapiens (human); hsa04932 Non-alcoholic fatty liver disease (NAFLD) - Homo sapiens (human); hsa05160 Hepatitis C - Homo sapiens (human); hsa05162 Measles - Homo sapiens (human); hsa05164 Influenza …	IPR024054; IPR012340; IPR003029; IPR022967; IPR024055;	Translation initiation factor 2, alpha subunit, middle domain; Nucleic acid-binding, OB-fold; S1 domain; RNA-binding domain, S1; Translation initiation factor 2, alpha subunit, C-terminal;	J	KOG2916	Translation initiation factor 2, alpha subunit (eIF-2alpha)
Q92499	ATP-dependent RNA helicase DDX1 OS=Homo sapiens OX=9606 GN=DDX1 PE=1 SV=2	DDX1	82.431	42.8	0.858	0.038856	cytoplasm	GO:0044085 cellular component biogenesis; GO:0022613 ribonucleoprotein complex biogenesis; GO:1903608 protein localization to cytoplasmic stress granule; GO:0022618 ribonucleoprotein complex assembly; GO:0010608 posttranscriptional regulation of gene expression; GO:0097659 nucleic acid-templated transcription; GO:0032392 DNA geometric change; GO:0044699 single-organism process; GO:0009058 biosynt…	GO:0016020 membrane; GO:0005737 cytoplasm; GO:0032991 macromolecular complex; GO:0044424 intracellular part; GO:0016604 nuclear body; GO:0005623 cell; GO:0036464 cytoplasmic ribonucleoprotein granule; GO:0044422 organelle part; GO:0043228 non-membrane-bounded organelle; GO:0031974 membrane-enclosed lumen; GO:0005654 nucleoplasm; GO:0072669 tRNA-splicing ligase complex; GO:0070013 intracellular or…	GO:1901265 nucleoside phosphate binding; GO:0008026 ATP-dependent helicase activity; GO:0016817 hydrolase activity, acting on acid anhydrides; GO:0005515 protein binding; GO:0016787 hydrolase activity; GO:0003682 chromatin binding; GO:0016887 ATPase activity; GO:0097159 organic cyclic compound binding; GO:1901363 heterocyclic compound binding; GO:0016462 pyrophosphatase activity; GO:0032553 ribon…	K13177	DDX1; ATP-dependent RNA helicase DDX1 [EC:3.6.4.13]		IPR011545; IPR001870; IPR027417; IPR013320; IPR003877; IPR014014; IPR014001; IPR001650;	DEAD/DEAH box helicase domain; B30.2/SPRY domain; P-loop containing nucleoside triphosphate hydrolase; Concanavalin A-like lectin/glucanase domain; SPRY domain; RNA helicase, DEAD-box type, Q motif; Helicase superfamily 1/2, ATP-binding domain; Helicase, C-terminal;	A	KOG0349	Putative DEAD-box RNA helicase DDX1
P55268	Laminin subunit beta-2 OS=Homo sapiens OX=9606 GN=LAMB2 PE=1 SV=2	LAMB2	195.98	24.6	2.969	1.378e-07	extracellular	GO:0007528 neuromuscular junction development; GO:0007601 visual perception; GO:0048666 neuron development; GO:0048869 cellular developmental process; GO:0014037 Schwann cell differentiation; GO:0032989 cellular component morphogenesis; GO:0022008 neurogenesis; GO:0044699 single-organism process; GO:0014044 Schwann cell development; GO:0050877 neurological system process; GO:0009611 response to w…	GO:0043260 laminin-11 complex; GO:0005615 extracellular space; GO:0044421 extracellular region part; GO:0031982 vesicle; GO:0032991 macromolecular complex; GO:0044420 extracellular matrix component; GO:0005576 extracellular region; GO:0043083 synaptic cleft; GO:0045202 synapse; GO:0043256 laminin complex; GO:0005604 basement membrane; GO:0070062 extracellular exosome; GO:0043226 organelle; GO:000…	GO:0050839 cell adhesion molecule binding; GO:0005102 receptor binding; GO:0005488 binding; GO:0044877 macromolecular complex binding; GO:0005515 protein binding; GO:0005178 integrin binding; GO:0005198 structural molecule activity; GO:0032403 protein complex binding;	K06243	LAMB2; laminin, beta 2	hsa04151 PI3K-Akt signaling pathway - Homo sapiens (human); hsa04510 Focal adhesion - Homo sapiens (human); hsa04512 ECM-receptor interaction - Homo sapiens (human); hsa05145 Toxoplasmosis - Homo sapiens (human); hsa05146 Amoebiasis - Homo sapiens (human); hsa05165 Human papillomavirus infection - Homo sapiens (human); hsa05200 Pathways in cancer - Homo sapiens (human); hsa05222 Small cell lung c…	IPR013015; IPR002049; IPR000742; IPR008211;	Laminin IV type B; Laminin EGF domain; EGF-like domain; Laminin, N-terminal;	W	KOG0994	Extracellular matrix glycoprotein Laminin subunit beta
P41226	Ubiquitin-like modifier-activating enzyme 7 OS=Homo sapiens OX=9606 GN=UBA7 PE=1 SV=2	UBA7	111.69	10.8	1.377	0.008739	cytoplasm,nucleus	GO:0033554 cellular response to stress; GO:0051603 proteolysis involved in cellular protein catabolic process; GO:0032479 regulation of type I interferon production; GO:0044257 cellular protein catabolic process; GO:0006725 cellular aromatic compound metabolic process; GO:0006259 DNA metabolic process; GO:0044267 cellular protein metabolic process; GO:0051241 negative regulation of multicellular …	GO:0043229 intracellular organelle; GO:0005737 cytoplasm; GO:0044446 intracellular organelle part; GO:0031981 nuclear lumen; GO:0044424 intracellular part; GO:0005829 cytosol; GO:0005623 cell; GO:0044422 organelle part; GO:0043226 organelle; GO:0043231 intracellular membrane-bounded organelle; GO:0031974 membrane-enclosed lumen; GO:0005654 nucleoplasm; GO:0005634 nucleus; GO:0070013 intracellular…	GO:0008641 small protein activating enzyme activity; GO:0005524 ATP binding; GO:1901265 nucleoside phosphate binding; GO:0019787 ubiquitin-like protein transferase activity; GO:0001882 nucleoside binding; GO:0043167 ion binding; GO:0016874 ligase activity; GO:0005515 protein binding; GO:0016877 ligase activity, forming carbon-sulfur bonds; GO:0000166 nucleotide binding; GO:0097159 organic cyclic …	K10698	UBE1L, UBA7; ubiquitin-activating enzyme E1-like [EC:6.2.1.45]	hsa04120 Ubiquitin mediated proteolysis - Homo sapiens (human); hsa05012 Parkinson disease - Homo sapiens (human);	IPR032418; IPR019572; IPR000594; IPR016040; IPR032420; IPR018965;	Ubiquitin-activating enzyme E1, FCCH domain; Ubiquitin-activating enzyme, catalytic cysteine domain; THIF-type NAD/FAD binding fold; NAD(P)-binding domain; Ubiquitin-activating enzyme E1, four-helix bundle; Ubiquitin-activating enzyme E1, C-terminal;	O	KOG2012	Ubiquitin activating enzyme UBA1
Q13564	NEDD8-activating enzyme E1 regulatory subunit OS=Homo sapiens OX=9606 GN=NAE1 PE=1 SV=1	NAE1	60.246	20.2	0.988	0.854	cytoplasm	GO:0044700 single organism signaling; GO:0010941 regulation of cell death; GO:0070997 neuron death; GO:0043523 regulation of neuron apoptotic process; GO:0044699 single-organism process; GO:0010564 regulation of cell cycle process; GO:0044237 cellular metabolic process; GO:0045930 negative regulation of mitotic cell cycle; GO:0007165 signal transduction; GO:0008152 metabolic process; GO:0044774 m…	GO:0016020 membrane; GO:0071944 cell periphery; GO:0044464 cell part; GO:0005622 intracellular; GO:0005737 cytoplasm; GO:0044424 intracellular part; GO:0005623 cell; GO:0005886 plasma membrane;	GO:0008641 small protein activating enzyme activity; GO:0019781 NEDD8 activating enzyme activity; GO:0031625 ubiquitin protein ligase binding; GO:0046982 protein heterodimerization activity; GO:0003824 catalytic activity; GO:0005488 binding; GO:0046983 protein dimerization activity; GO:0016874 ligase activity; GO:0016877 ligase activity, forming carbon-sulfur bonds; GO:0005515 protein binding; GO…	K04532	NAE1, APPBP1; amyloid beta precursor protein binding protein 1	hsa05010 Alzheimer disease - Homo sapiens (human);	IPR000594; IPR016040;	THIF-type NAD/FAD binding fold; NAD(P)-binding domain;	O	KOG2016	NEDD8-activating complex, APP-BP1/UBA5 component
Q7Z6K3	Protein prenyltransferase alpha subunit repeat-containing protein 1 OS=Homo sapiens OX=9606 GN=PTAR1 PE=1 SV=2	PTAR1	46.405	5	3.745	3.6943e-05	cytoskeleton	GO:0018342 protein prenylation; GO:0008152 metabolic process; GO:0044260 cellular macromolecule metabolic process; GO:0044267 cellular protein metabolic process; GO:0006464 cellular protein modification process; GO:0043170 macromolecule metabolic process; GO:0019538 protein metabolic process; GO:0036211 protein modification process; GO:0043412 macromolecule modification; GO:0044238 primary metabo…		GO:0016765 transferase activity, transferring alkyl or aryl (other than methyl) groups; GO:0004659 prenyltransferase activity; GO:0003824 catalytic activity; GO:0016740 transferase activity; GO:0008318 protein prenyltransferase activity;	K14137	PTAR1; protein prenyltransferase alpha subunit repeat containing protein 1
P05026	Sodium/potassium-transporting ATPase subunit beta-1 OS=Homo sapiens OX=9606 GN=ATP1B1 PE=1 SV=1	ATP1B1	35.061	10.6	0.971	0.66472	plasma membrane	GO:0044700 single organism signaling; GO:0009116 nucleoside metabolic process; GO:0065008 regulation of biological quality; GO:0055075 potassium ion homeostasis; GO:0030004 cellular monovalent inorganic cation homeostasis; GO:1904427 positive regulation of calcium ion transmembrane transport; GO:0044237 cellular metabolic process; GO:0015031 protein transport; GO:0061337 cardiac conduction; GO:00…	GO:0016323 basolateral plasma membrane; GO:0016020 membrane; GO:0044421 extracellular region part; GO:0016324 apical plasma membrane; GO:0098857 membrane microdomain; GO:0030054 cell junction; GO:0044291 cell-cell contact zone; GO:0071944 cell periphery; GO:0031982 vesicle; GO:0032991 macromolecular complex; GO:0031224 intrinsic component of membrane; GO:0005887 integral component of plasma membr…	GO:0042625 ATPase coupled ion transmembrane transporter activity; GO:0008556 potassium-transporting ATPase activity; GO:0060589 nucleoside-triphosphatase regulator activity; GO:0015399 primary active transmembrane transporter activity; GO:0019901 protein kinase binding; GO:0005391 sodium:potassium-exchanging ATPase activity; GO:0022892 substrate-specific transporter activity; GO:0016817 hydrolase…	K01540	ATP1B, CD298; sodium/potassium-transporting ATPase subunit beta	hsa04022 cGMP-PKG signaling pathway - Homo sapiens (human); hsa04024 cAMP signaling pathway - Homo sapiens (human); hsa04260 Cardiac muscle contraction - Homo sapiens (human); hsa04261 Adrenergic signaling in cardiomyocytes - Homo sapiens (human); hsa04911 Insulin secretion - Homo sapiens (human); hsa04918 Thyroid hormone synthesis - Homo sapiens (human); hsa04919 Thyroid hormone signaling pathwa…			P	KOG3927	Na+/K+ ATPase, beta subunit
P05455	Lupus La protein OS=Homo sapiens OX=9606 GN=SSB PE=1 SV=2	SSB	46.836	36.5	0.555	7.9204e-05	nucleus	GO:0075522 IRES-dependent viral translational initiation; GO:1903608 protein localization to cytoplasmic stress granule; GO:0006518 peptide metabolic process; GO:0009058 biosynthetic process; GO:0044764 multi-organism cellular process; GO:0009451 RNA modification; GO:0044237 cellular metabolic process; GO:0008152 metabolic process; GO:0044033 multi-organism metabolic process; GO:0002181 cytoplasm…	GO:0043229 intracellular organelle; GO:0000784 nuclear chromosome, telomeric region; GO:0000781 chromosome, telomeric region; GO:0043232 intracellular non-membrane-bounded organelle; GO:0044446 intracellular organelle part; GO:0032991 macromolecular complex; GO:0031981 nuclear lumen; GO:0044424 intracellular part; GO:0005623 cell; GO:0044422 organelle part; GO:0044427 chromosomal part; GO:0043228…	GO:0097159 organic cyclic compound binding; GO:1901363 heterocyclic compound binding; GO:0003729 mRNA binding; GO:0003723 RNA binding; GO:1901265 nucleoside phosphate binding; GO:0000049 tRNA binding; GO:0005488 binding; GO:0003676 nucleic acid binding; GO:0005515 protein binding; GO:0000166 nucleotide binding; GO:0036094 small molecule binding;	K11090	LA, SSB; lupus La protein	hsa05322 Systemic lupus erythematosus - Homo sapiens (human);	IPR011991; IPR006630; IPR000504; IPR012677; IPR014886;	Winged helix-turn-helix DNA-binding domain; RNA-binding protein Lupus La; RNA recognition motif domain; Nucleotide-binding alpha-beta plait domain; La protein, RNA-binding domain;
Q8TDG2	Actin-related protein T1 OS=Homo sapiens OX=9606 GN=ACTRT1 PE=2 SV=2	ACTRT1	41.696	2.9	0.683	0.174098	cytoplasm		GO:0005856 cytoskeleton; GO:0043226 organelle; GO:0043229 intracellular organelle; GO:0043232 intracellular non-membrane-bounded organelle; GO:0044464 cell part; GO:0005622 intracellular; GO:0005737 cytoplasm; GO:0044424 intracellular part; GO:0005623 cell; GO:0043228 non-membrane-bounded organelle;							Z	KOG0676	Actin and related proteins
Q13017	Rho GTPase-activating protein 5 OS=Homo sapiens OX=9606 GN=ARHGAP5 PE=1 SV=2	ARHGAP5	172.46	0.9			nucleus	GO:0050794 regulation of cellular process; GO:0044700 single organism signaling; GO:0044707 single-multicellular organism process; GO:0048732 gland development; GO:0023051 regulation of signaling; GO:0044699 single-organism process; GO:0050896 response to stimulus; GO:0030879 mammary gland development; GO:0022610 biological adhesion; GO:0007165 signal transduction; GO:0010646 regulation of cell c…	GO:0043226 organelle; GO:0043231 intracellular membrane-bounded organelle; GO:0043229 intracellular organelle; GO:0016020 membrane; GO:0005783 endoplasmic reticulum; GO:0044464 cell part; GO:0005622 intracellular; GO:0005737 cytoplasm; GO:0012505 endomembrane system; GO:0044424 intracellular part; GO:0005829 cytosol; GO:0043227 membrane-bounded organelle; GO:0005623 cell; GO:0044444 cytoplasmic p…	GO:1901265 nucleoside phosphate binding; GO:0060589 nucleoside-triphosphatase regulator activity; GO:0030695 GTPase regulator activity; GO:0016817 hydrolase activity, acting on acid anhydrides; GO:0016787 hydrolase activity; GO:0005515 protein binding; GO:0098772 molecular function regulator; GO:0097159 organic cyclic compound binding; GO:1901363 heterocyclic compound binding; GO:0016462 pyrophos…	K13709	ARHGAP5; Rho GTPase-activating protein 5	hsa04510 Focal adhesion - Homo sapiens (human); hsa04670 Leukocyte transendothelial migration - Homo sapiens (human);	IPR002713; IPR027417; IPR008936; IPR032835; IPR000198;	FF domain; P-loop containing nucleoside triphosphate hydrolase; Rho GTPase activation protein; Rho GTPase-activating protein, FF domain; Rho GTPase-activating protein domain;	T	KOG4271	Rho-GTPase activating protein
O96005	Cleft lip and palate transmembrane protein 1 OS=Homo sapiens OX=9606 GN=CLPTM1 PE=1 SV=1	CLPTM1	76.096	9.7	1.607	0.0146395	plasma membrane	GO:0050794 regulation of cellular process; GO:0050863 regulation of T cell activation; GO:0044707 single-multicellular organism process; GO:0002694 regulation of leukocyte activation; GO:0045580 regulation of T cell differentiation; GO:0048869 cellular developmental process; GO:0033081 regulation of T cell differentiation in thymus; GO:0044699 single-organism process; GO:0051249 regulation of lym…	GO:0016020 membrane; GO:0031226 intrinsic component of plasma membrane; GO:0009897 external side of plasma membrane; GO:0044459 plasma membrane part; GO:0044425 membrane part; GO:0044464 cell part; GO:0071944 cell periphery; GO:0031224 intrinsic component of membrane; GO:0009986 cell surface; GO:0005887 integral component of plasma membrane; GO:0005623 cell; GO:0016021 integral component of membr…	GO:0005515 protein binding; GO:0005488 binding;						R	KOG2489	Transmembrane protein
Q9NXV6	CDKN2A-interacting protein OS=Homo sapiens OX=9606 GN=CDKN2AIP PE=1 SV=3	CDKN2AIP	61.124	4	2.088	0.00184006	nucleus	GO:0050794 regulation of cellular process; GO:0033554 cellular response to stress; GO:0051716 cellular response to stimulus; GO:0045926 negative regulation of growth; GO:0065008 regulation of biological quality; GO:0040008 regulation of growth; GO:0006950 response to stress; GO:0030307 positive regulation of cell growth; GO:0023051 regulation of signaling; GO:0048522 positive regulation of cellul…	GO:0043229 intracellular organelle; GO:0043232 intracellular non-membrane-bounded organelle; GO:0044446 intracellular organelle part; GO:0031981 nuclear lumen; GO:0044452 nucleolar part; GO:0044424 intracellular part; GO:0005730 nucleolus; GO:0005623 cell; GO:0044422 organelle part; GO:0043228 non-membrane-bounded organelle; GO:0043226 organelle; GO:0043231 intracellular membrane-bounded organell…	GO:0097159 organic cyclic compound binding; GO:1901363 heterocyclic compound binding; GO:0003723 RNA binding; GO:0005515 protein binding; GO:0002039 p53 binding; GO:0005488 binding; GO:0003676 nucleic acid binding;				IPR021859; IPR014720;	XRN-Two Binding Domain, XTBD; Double-stranded RNA-binding domain;
Q14145	Kelch-like ECH-associated protein 1 OS=Homo sapiens OX=9606 GN=KEAP1 PE=1 SV=2	KEAP1	69.666	3.5	5.024	2.0448e-05	cytoplasm,nucleus	GO:0065008 regulation of biological quality; GO:0032270 positive regulation of cellular protein metabolic process; GO:0097659 nucleic acid-templated transcription; GO:0043009 chordate embryonic development; GO:0032436 positive regulation of proteasomal ubiquitin-dependent protein catabolic process; GO:1903533 regulation of protein targeting; GO:0090317 negative regulation of intracellular protein…	GO:0005783 endoplasmic reticulum; GO:0005737 cytoplasm; GO:0032991 macromolecular complex; GO:0099512 supramolecular fiber; GO:0044424 intracellular part; GO:0099080 supramolecular complex; GO:0005623 cell; GO:0044422 organelle part; GO:0043228 non-membrane-bounded organelle; GO:0005856 cytoskeleton; GO:0031974 membrane-enclosed lumen; GO:0005815 microtubule organizing center; GO:0005654 nucleopl…	GO:0005515 protein binding; GO:0008134 transcription factor binding; GO:0005488 binding;	K10456	KLHL19, KEAP1, INRF2; kelch-like protein 19	hsa04120 Ubiquitin mediated proteolysis - Homo sapiens (human); hsa05200 Pathways in cancer - Homo sapiens (human); hsa05225 Hepatocellular carcinoma - Homo sapiens (human); hsa05418 Fluid shear stress and atherosclerosis - Homo sapiens (human);	IPR015916; IPR011333; IPR011705; IPR000210;	Galactose oxidase, beta-propeller; SKP1/BTB/POZ domain; BTB/Kelch-associated; BTB/POZ domain;	TR	KOG4441	Proteins containing BTB/POZ and Kelch domains, involved in regulatory/signal transduction processes
O94906	Pre-mRNA-processing factor 6 OS=Homo sapiens OX=9606 GN=PRPF6 PE=1 SV=1	PRPF6	106.92	13.7	0.866	0.27162	cytoplasm	GO:0044085 cellular component biogenesis; GO:0022613 ribonucleoprotein complex biogenesis; GO:0022618 ribonucleoprotein complex assembly; GO:0009891 positive regulation of biosynthetic process; GO:0044237 cellular metabolic process; GO:2001141 regulation of RNA biosynthetic process; GO:0008152 metabolic process; GO:0071826 ribonucleoprotein complex subunit organization; GO:0009893 positive regula…	GO:0043229 intracellular organelle; GO:0016020 membrane; GO:0044446 intracellular organelle part; GO:0046540 U4/U6 x U5 tri-snRNP complex; GO:0031981 nuclear lumen; GO:0032991 macromolecular complex; GO:0044424 intracellular part; GO:0005681 spliceosomal complex; GO:0016604 nuclear body; GO:0005623 cell; GO:0044422 organelle part; GO:0097525 spliceosomal snRNP complex; GO:0031974 membrane-enclose…	GO:0003723 RNA binding; GO:0005102 receptor binding; GO:0044877 macromolecular complex binding; GO:0005515 protein binding; GO:0050681 androgen receptor binding; GO:0051427 hormone receptor binding; GO:0003712 transcription cofactor activity; GO:1901363 heterocyclic compound binding; GO:0097159 organic cyclic compound binding; GO:0005488 binding; GO:0003676 nucleic acid binding; GO:0035257 nuclea…	K12855	PRPF6, PRP6; pre-mRNA-processing factor 6	hsa03040 Spliceosome - Homo sapiens (human);	IPR011990; IPR010491; IPR013026;	Tetratricopeptide-like helical domain; PRP1 splicing factor, N-terminal; Tetratricopeptide repeat-containing domain;	A	KOG0495	HAT repeat protein
Q9P0I2	ER membrane protein complex subunit 3 OS=Homo sapiens OX=9606 GN=EMC3 PE=1 SV=3	EMC3	29.952	14.9	2.256	0.00074033	endoplasmic reticulum	GO:0006457 protein folding; GO:0034975 protein folding in endoplasmic reticulum; GO:0009987 cellular process;	GO:0043229 intracellular organelle; GO:0016020 membrane; GO:0005783 endoplasmic reticulum; GO:0042175 nuclear outer membrane-endoplasmic reticulum membrane network; GO:0098796 membrane protein complex; GO:0005737 cytoplasm; GO:0044446 intracellular organelle part; GO:0012505 endomembrane system; GO:0032991 macromolecular complex; GO:0031224 intrinsic component of membrane; GO:0044424 intracellula…							S	KOG3188	Uncharacterized conserved protein
P51991	Heterogeneous nuclear ribonucleoprotein A3 OS=Homo sapiens OX=9606 GN=HNRNPA3 PE=1 SV=2	HNRNPA3	39.594	43.4	0.756	0.30286	nucleus	GO:0050658 RNA transport; GO:0006725 cellular aromatic compound metabolic process; GO:0051028 mRNA transport; GO:0044237 cellular metabolic process; GO:0051236 establishment of RNA localization; GO:0071704 organic substance metabolic process; GO:0051234 establishment of localization; GO:0000398 mRNA splicing, via spliceosome; GO:0008152 metabolic process; GO:0000377 RNA splicing, via transesterif…	GO:0005737 cytoplasm; GO:0032991 macromolecular complex; GO:0044424 intracellular part; GO:0005623 cell; GO:0044422 organelle part; GO:0043228 non-membrane-bounded organelle; GO:0031974 membrane-enclosed lumen; GO:1902494 catalytic complex; GO:0005654 nucleoplasm; GO:0070013 intracellular organelle lumen; GO:0005622 intracellular; GO:0044464 cell part; GO:0043005 neuron projection; GO:0043227 mem…	GO:0003723 RNA binding; GO:1901265 nucleoside phosphate binding; GO:0022884 macromolecule transmembrane transporter activity; GO:0051033 RNA transmembrane transporter activity; GO:0022892 substrate-specific transporter activity; GO:0005515 protein binding; GO:0000166 nucleotide binding; GO:0051032 nucleic acid transmembrane transporter activity; GO:0022891 substrate-specific transmembrane transpo…	K12741	HNRNPA1_3; heterogeneous nuclear ribonucleoprotein A1/A3	hsa03040 Spliceosome - Homo sapiens (human);	IPR000504; IPR012677;	RNA recognition motif domain; Nucleotide-binding alpha-beta plait domain;	R	KOG0118	FOG: RRM domain
Q96GA3	Protein LTV1 homolog OS=Homo sapiens OX=9606 GN=LTV1 PE=1 SV=1	LTV1	54.854	6.1	0.756	0.0031384	nucleus	GO:0051640 organelle localization; GO:0050658 RNA transport; GO:0044085 cellular component biogenesis; GO:0046907 intracellular transport; GO:0022613 ribonucleoprotein complex biogenesis; GO:0033750 ribosome localization; GO:0006725 cellular aromatic compound metabolic process; GO:0033753 establishment of ribosome localization; GO:0051169 nuclear transport; GO:0051168 nuclear export; GO:0071428 r…	GO:0016020 membrane; GO:0031410 cytoplasmic vesicle; GO:0031090 organelle membrane; GO:0098796 membrane protein complex; GO:0005737 cytoplasm; GO:0031982 vesicle; GO:0044433 cytoplasmic vesicle part; GO:0032991 macromolecular complex; GO:0044424 intracellular part; GO:0005623 cell; GO:0030688 preribosome, small subunit precursor; GO:0044422 organelle part; GO:0030684 preribosome; GO:0031974 membr…	GO:0005515 protein binding; GO:0005488 binding;	K14798	LTV1; protein LTV1				S	KOG2637	Uncharacterized conserved protein
Q9H1K1	Iron-sulfur cluster assembly enzyme ISCU, mitochondrial OS=Homo sapiens OX=9606 GN=ISCU PE=1 SV=2	ISCU	17.999	10.8	1.741	0.00016144	mitochondria	GO:0044085 cellular component biogenesis; GO:0051188 cofactor biosynthetic process; GO:0006879 cellular iron ion homeostasis; GO:0016043 cellular component organization; GO:0065008 regulation of biological quality; GO:0055076 transition metal ion homeostasis; GO:0030003 cellular cation homeostasis; GO:0055072 iron ion homeostasis; GO:0044699 single-organism process; GO:0009058 biosynthetic proces…	GO:0005759 mitochondrial matrix; GO:0043229 intracellular organelle; GO:0044429 mitochondrial part; GO:0005737 cytoplasm; GO:0044446 intracellular organelle part; GO:0044424 intracellular part; GO:0005829 cytosol; GO:0005623 cell; GO:0005739 mitochondrion; GO:0044422 organelle part; GO:0031974 membrane-enclosed lumen; GO:0043226 organelle; GO:0043231 intracellular membrane-bounded organelle; GO:0…	GO:0051537 2 iron, 2 sulfur cluster binding; GO:0005506 iron ion binding; GO:0043167 ion binding; GO:0005515 protein binding; GO:0051539 4 iron, 4 sulfur cluster binding; GO:0032947 protein complex scaffold; GO:0046914 transition metal ion binding; GO:0003824 catalytic activity; GO:0051536 iron-sulfur cluster binding; GO:0005488 binding; GO:0043169 cation binding; GO:0046872 metal ion binding; GO…	K22068	ISCU; iron-sulfur cluster assembly enzyme ISCU, mitochondrial		IPR002871;	NIF system FeS cluster assembly, NifU, N-terminal;	C	KOG3361	Iron binding protein involved in Fe-S cluster formation
Q13546	Receptor-interacting serine/threonine-protein kinase 1 OS=Homo sapiens OX=9606 GN=RIPK1 PE=1 SV=3	RIPK1	75.93	13.6	1.257	0.054402	nucleus	GO:0044085 cellular component biogenesis; GO:0044700 single organism signaling; GO:0010941 regulation of cell death; GO:0032872 regulation of stress-activated MAPK cascade; GO:0032680 regulation of tumor necrosis factor production; GO:0009891 positive regulation of biosynthetic process; GO:0031347 regulation of defense response; GO:0044237 cellular metabolic process; GO:0071900 regulation of prot…	GO:0043229 intracellular organelle; GO:0016020 membrane; GO:0098796 membrane protein complex; GO:0098857 membrane microdomain; GO:0071944 cell periphery; GO:0098797 plasma membrane protein complex; GO:0097342 ripoptosome; GO:0005737 cytoplasm; GO:0043235 receptor complex; GO:0032991 macromolecular complex; GO:0044424 intracellular part; GO:0005829 cytosol; GO:0005623 cell; GO:0005739 mitochondrio…	GO:1901265 nucleoside phosphate binding; GO:0016773 phosphotransferase activity, alcohol group as acceptor; GO:0031625 ubiquitin protein ligase binding; GO:0005102 receptor binding; GO:0032813 tumor necrosis factor receptor superfamily binding; GO:0005515 protein binding; GO:0004672 protein kinase activity; GO:0004871 signal transducer activity; GO:1901363 heterocyclic compound binding; GO:009715…	K02861	RIPK1, RIP1; receptor-interacting serine/threonine-protein kinase 1 [EC:2.7.11.1]	hsa04064 NF-kappa B signaling pathway - Homo sapiens (human); hsa04210 Apoptosis - Homo sapiens (human); hsa04217 Necroptosis - Homo sapiens (human); hsa04620 Toll-like receptor signaling pathway - Homo sapiens (human); hsa04621 NOD-like receptor signaling pathway - Homo sapiens (human); hsa04622 RIG-I-like receptor signaling pathway - Homo sapiens (human); hsa04623 Cytosolic DNA-sensing pathway …	IPR000488; IPR025735; IPR000719; IPR011029; IPR001245; IPR011009;	Death domain; RHIM domain; Protein kinase domain; Death-like domain; Serine-threonine/tyrosine-protein kinase catalytic domain; Protein kinase-like domain;	T	KOG0192	Tyrosine kinase specific for activated (GTP-bound) p21cdc42Hs
P08195	4F2 cell-surface antigen heavy chain OS=Homo sapiens OX=9606 GN=SLC3A2 PE=1 SV=3	SLC3A2	67.993	22.2	0.905	0.071202	endoplasmic reticulum	GO:1901606 alpha-amino acid catabolic process; GO:0051674 localization of cell; GO:0043090 amino acid import; GO:0044699 single-organism process; GO:0044237 cellular metabolic process; GO:0051234 establishment of localization; GO:0008152 metabolic process; GO:0006520 cellular amino acid metabolic process; GO:0006569 tryptophan catabolic process; GO:0006586 indolalkylamine metabolic process; GO:19…	GO:0016020 membrane; GO:0044421 extracellular region part; GO:0016324 apical plasma membrane; GO:0031410 cytoplasmic vesicle; GO:0071944 cell periphery; GO:0005737 cytoplasm; GO:0031982 vesicle; GO:0031224 intrinsic component of membrane; GO:0044424 intracellular part; GO:0005623 cell; GO:0048770 pigment granule; GO:0070062 extracellular exosome; GO:0098590 plasma membrane region; GO:0044464 cell…	GO:0022892 substrate-specific transporter activity; GO:0015077 monovalent inorganic cation transmembrane transporter activity; GO:0005515 protein binding; GO:0015297 antiporter activity; GO:0022891 substrate-specific transmembrane transporter activity; GO:0099516 ion antiporter activity; GO:1901363 heterocyclic compound binding; GO:0097159 organic cyclic compound binding; GO:0015175 neutral amino…	K06519	SLC3A2, MDU1, CD98; solute carrier family 3, member 2	hsa04150 mTOR signaling pathway - Homo sapiens (human); hsa04216 Ferroptosis - Homo sapiens (human); hsa04974 Protein digestion and absorption - Homo sapiens (human);	IPR013780; IPR031984; IPR017853; IPR013781; IPR006047;	Glycosyl hydrolase, all-beta; Solute carrier family 3 member 2, N-terminal domain; Glycoside hydrolase superfamily; Glycoside hydrolase, catalytic domain; Glycosyl hydrolase, family 13, catalytic domain;	G	KOG0471	Alpha-amylase
P31749	RAC-alpha serine/threonine-protein kinase OS=Homo sapiens OX=9606 GN=AKT1 PE=1 SV=2	AKT1	55.686	23.3	0.549	0.0005567	cytoplasm	GO:0044700 single organism signaling; GO:0002694 regulation of leukocyte activation; GO:0032872 regulation of stress-activated MAPK cascade; GO:0048732 gland development; GO:0022414 reproductive process; GO:0010608 posttranscriptional regulation of gene expression; GO:0032436 positive regulation of proteasomal ubiquitin-dependent protein catabolic process; GO:0042593 glucose homeostasis; GO:00902…	GO:0016020 membrane; GO:0030054 cell junction; GO:0071944 cell periphery; GO:0031982 vesicle; GO:0005737 cytoplasm; GO:0032991 macromolecular complex; GO:0044424 intracellular part; GO:0005911 cell-cell junction; GO:0005623 cell; GO:0044422 organelle part; GO:0043228 non-membrane-bounded organelle; GO:0005856 cytoskeleton; GO:0031974 membrane-enclosed lumen; GO:0005815 microtubule organizing cent…	GO:0030235 nitric-oxide synthase regulator activity; GO:1901265 nucleoside phosphate binding; GO:0019903 protein phosphatase binding; GO:0016773 phosphotransferase activity, alcohol group as acceptor; GO:0019901 protein kinase binding; GO:0005515 protein binding; GO:0004672 protein kinase activity; GO:0098772 molecular function regulator; GO:0051721 protein phosphatase 2A binding; GO:0032794 GTPa…	K04456	AKT; RAC serine/threonine-protein kinase [EC:2.7.11.1]	hsa01521 EGFR tyrosine kinase inhibitor resistance - Homo sapiens (human); hsa01522 Endocrine resistance - Homo sapiens (human); hsa01524 Platinum drug resistance - Homo sapiens (human); hsa04010 MAPK signaling pathway - Homo sapiens (human); hsa04012 ErbB signaling pathway - Homo sapiens (human); hsa04014 Ras signaling pathway - Homo sapiens (human); hsa04015 Rap1 signaling pathway - Homo sapien…	IPR000719; IPR011993; IPR000961; IPR011009; IPR017892; IPR001849;	Protein kinase domain; PH domain-like; AGC-kinase, C-terminal; Protein kinase-like domain; Protein kinase, C-terminal; Pleckstrin homology domain;	RT	KOG0598	Ribosomal protein S6 kinase and related proteins
P49796	Regulator of G-protein signaling 3 OS=Homo sapiens OX=9606 GN=RGS3 PE=1 SV=2	RGS3	132.33	0.9			nucleus	GO:0045859 regulation of protein kinase activity; GO:0050794 regulation of cellular process; GO:0043407 negative regulation of MAP kinase activity; GO:0009968 negative regulation of signal transduction; GO:0000188 inactivation of MAPK activity; GO:0043405 regulation of MAP kinase activity; GO:0060255 regulation of macromolecule metabolic process; GO:0031399 regulation of protein modification proc…	GO:0043229 intracellular organelle; GO:0016020 membrane; GO:0071944 cell periphery; GO:0005737 cytoplasm; GO:0044446 intracellular organelle part; GO:0031981 nuclear lumen; GO:0044424 intracellular part; GO:0005829 cytosol; GO:0005623 cell; GO:0044422 organelle part; GO:0005886 plasma membrane; GO:0043226 organelle; GO:0043231 intracellular membrane-bounded organelle; GO:0031974 membrane-enclosed…	GO:0030234 enzyme regulator activity; GO:0060589 nucleoside-triphosphatase regulator activity; GO:0005488 binding; GO:0030695 GTPase regulator activity; GO:0005515 protein binding; GO:0098772 molecular function regulator; GO:0008047 enzyme activator activity; GO:0005096 GTPase activator activity;	K07524	RGS3; regulator of G-protein signalling 3	hsa04360 Axon guidance - Homo sapiens (human);	IPR016137; IPR024066; IPR011993; IPR001478; IPR000008;	RGS domain; RGS, subdomain 1; PH domain-like; PDZ domain; C2 domain;	T	KOG3589	G protein signaling regulators
Q9UMX0	Ubiquilin-1 OS=Homo sapiens OX=9606 GN=UBQLN1 PE=1 SV=2	UBQLN1	62.518	16	6.257	6.6162e-07	nucleus	GO:0044085 cellular component biogenesis; GO:1905037 autophagosome organization; GO:0010941 regulation of cell death; GO:0032270 positive regulation of cellular protein metabolic process; GO:0032436 positive regulation of proteasomal ubiquitin-dependent protein catabolic process; GO:0036503 ERAD pathway; GO:1903170 negative regulation of calcium ion transmembrane transport; GO:0031347 regulation …	GO:0016020 membrane; GO:0005783 endoplasmic reticulum; GO:0031410 cytoplasmic vesicle; GO:0071944 cell periphery; GO:0031982 vesicle; GO:0005737 cytoplasm; GO:0032991 macromolecular complex; GO:0044424 intracellular part; GO:0005623 cell; GO:0044422 organelle part; GO:0005776 autophagosome; GO:1905369 endopeptidase complex; GO:0031974 membrane-enclosed lumen; GO:0005654 nucleoplasm; GO:1902494 ca…	GO:0031593 polyubiquitin binding; GO:0042802 identical protein binding; GO:0005488 binding; GO:0043130 ubiquitin binding; GO:0005515 protein binding; GO:0019900 kinase binding; GO:0032182 ubiquitin-like protein binding; GO:0019899 enzyme binding;	K04523	UBQLN, DSK2; ubiquilin	hsa04141 Protein processing in endoplasmic reticulum - Homo sapiens (human);	IPR006636; IPR015940; IPR029071; IPR000626; IPR009060;	Heat shock chaperonin-binding; Ubiquitin-associated domain; Ubiquitin-related domain; Ubiquitin domain; UBA-like;	OR	KOG0010	Ubiquitin-like protein
P43686	26S proteasome regulatory subunit 6B OS=Homo sapiens OX=9606 GN=PSMC4 PE=1 SV=2	PSMC4	47.366	45.7	0.808	0.000339	cytoplasm	GO:0044700 single organism signaling; GO:0010608 posttranscriptional regulation of gene expression; GO:0043009 chordate embryonic development; GO:0051443 positive regulation of ubiquitin-protein transferase activity; GO:0009891 positive regulation of biosynthetic process; GO:0031347 regulation of defense response; GO:0010564 regulation of cell cycle process; GO:0044237 cellular metabolic process;…	GO:0016020 membrane; GO:0005838 proteasome regulatory particle; GO:0005737 cytoplasm; GO:0032991 macromolecular complex; GO:0044424 intracellular part; GO:0005623 cell; GO:0044422 organelle part; GO:1905369 endopeptidase complex; GO:0031974 membrane-enclosed lumen; GO:1902494 catalytic complex; GO:0005654 nucleoplasm; GO:0070013 intracellular organelle lumen; GO:0022624 proteasome accessory compl…	GO:1901265 nucleoside phosphate binding; GO:0016817 hydrolase activity, acting on acid anhydrides; GO:0016787 hydrolase activity; GO:0005515 protein binding; GO:0016887 ATPase activity; GO:0097159 organic cyclic compound binding; GO:1901363 heterocyclic compound binding; GO:0016462 pyrophosphatase activity; GO:0032553 ribonucleotide binding; GO:0003824 catalytic activity; GO:0005488 binding; GO:0…	K03063	PSMC4, RPT3; 26S proteasome regulatory subunit T3	hsa03050 Proteasome - Homo sapiens (human); hsa05169 Epstein-Barr virus infection - Homo sapiens (human);	IPR003959; IPR003593; IPR027417;	ATPase, AAA-type, core; AAA+ ATPase domain; P-loop containing nucleoside triphosphate hydrolase;	O	KOG0727	26S proteasome regulatory complex, ATPase RPT3
Q9Y3U8	60S ribosomal protein L36 OS=Homo sapiens OX=9606 GN=RPL36 PE=1 SV=3	RPL36	12.254	37.1	0.57	0.0023028	nucleus	GO:0044085 cellular component biogenesis; GO:0022613 ribonucleoprotein complex biogenesis; GO:0072594 establishment of protein localization to organelle; GO:0006518 peptide metabolic process; GO:0009058 biosynthetic process; GO:0044764 multi-organism cellular process; GO:0044237 cellular metabolic process; GO:0015031 protein transport; GO:0051234 establishment of localization; GO:0006605 protein …	GO:0016020 membrane; GO:0005737 cytoplasm; GO:0032991 macromolecular complex; GO:0044424 intracellular part; GO:0005623 cell; GO:0044422 organelle part; GO:0043228 non-membrane-bounded organelle; GO:0031974 membrane-enclosed lumen; GO:0070013 intracellular organelle lumen; GO:0044391 ribosomal subunit; GO:0005622 intracellular; GO:0044464 cell part; GO:0044445 cytosolic part; GO:0043227 membrane-…	GO:0097159 organic cyclic compound binding; GO:1901363 heterocyclic compound binding; GO:0003723 RNA binding; GO:0005488 binding; GO:0003676 nucleic acid binding; GO:0005198 structural molecule activity; GO:0003735 structural constituent of ribosome;	K02920	RP-L36e, RPL36; large subunit ribosomal protein L36e	hsa03010 Ribosome - Homo sapiens (human);			J	KOG3452	60S ribosomal protein L36
Q92995	Ubiquitin carboxyl-terminal hydrolase 13 OS=Homo sapiens OX=9606 GN=USP13 PE=1 SV=2	USP13	97.326	4.2	1.233	0.033623	cytoplasm,nucleus	GO:0070646 protein modification by small protein removal; GO:0065008 regulation of biological quality; GO:0048869 cellular developmental process; GO:0044699 single-organism process; GO:0036503 ERAD pathway; GO:1905897 regulation of response to endoplasmic reticulum stress; GO:0006914 autophagy; GO:0044237 cellular metabolic process; GO:0070536 protein K63-linked deubiquitination; GO:2001141 regul…	GO:0043229 intracellular organelle; GO:0005737 cytoplasm; GO:0044446 intracellular organelle part; GO:0031981 nuclear lumen; GO:0044424 intracellular part; GO:0005829 cytosol; GO:0005623 cell; GO:0044422 organelle part; GO:0043226 organelle; GO:0043231 intracellular membrane-bounded organelle; GO:0031974 membrane-enclosed lumen; GO:0005654 nucleoplasm; GO:0005634 nucleus; GO:0070013 intracellular…	GO:0004843 thiol-dependent ubiquitin-specific protease activity; GO:0008233 peptidase activity; GO:1904454 ubiquitin-specific protease activity involved in positive regulation of ERAD pathway; GO:0031625 ubiquitin protein ligase binding; GO:0051087 chaperone binding; GO:0043167 ion binding; GO:0044877 macromolecular complex binding; GO:1904288 BAT3 complex binding; GO:0019783 ubiquitin-like prote…	K11836	USP5_13, UBP14; ubiquitin carboxyl-terminal hydrolase 5/13 [EC:3.4.19.12]		IPR001607; IPR015940; IPR013083; IPR001394; IPR028889; IPR009060;	Zinc finger, UBP-type; Ubiquitin-associated domain; Zinc finger, RING/FYVE/PHD-type; Peptidase C19, ubiquitin carboxyl-terminal hydrolase; Ubiquitin specific protease domain; UBA-like;	O	KOG0944	Ubiquitin-specific protease UBP14
Q8WVJ2	NudC domain-containing protein 2 OS=Homo sapiens OX=9606 GN=NUDCD2 PE=1 SV=1	NUDCD2	17.676	24.2	1.098	0.170262	cytoplasm	GO:0006457 protein folding; GO:0032502 developmental process; GO:0009987 cellular process;	GO:0044421 extracellular region part; GO:0031982 vesicle; GO:0005737 cytoplasm; GO:0032991 macromolecular complex; GO:0044424 intracellular part; GO:0005623 cell; GO:0000777 condensed chromosome kinetochore; GO:0044422 organelle part; GO:0044427 chromosomal part; GO:0043228 non-membrane-bounded organelle; GO:0070062 extracellular exosome; GO:0000793 condensed chromosome; GO:0005856 cytoskeleton; …	GO:0005515 protein binding; GO:0051082 unfolded protein binding; GO:0005488 binding;				IPR007052; IPR008978;	CS domain; HSP20-like chaperone;	T	KOG2265	Nuclear distribution protein NUDC
Q9UGV2	Protein NDRG3 OS=Homo sapiens OX=9606 GN=NDRG3 PE=1 SV=2	NDRG3	41.408	13.1	1.259	0.063258	cytoplasm	GO:0000003 reproduction; GO:0032502 developmental process; GO:0050794 regulation of cellular process; GO:0045926 negative regulation of growth; GO:0040008 regulation of growth; GO:0048232 male gamete generation; GO:0022414 reproductive process; GO:0007283 spermatogenesis; GO:0048869 cellular developmental process; GO:0019953 sexual reproduction; GO:0044763 single-organism cellular process; GO:004…	GO:0070062 extracellular exosome; GO:0043226 organelle; GO:0044421 extracellular region part; GO:0044464 cell part; GO:0005622 intracellular; GO:0005737 cytoplasm; GO:0031982 vesicle; GO:1903561 extracellular vesicle; GO:0044424 intracellular part; GO:0005623 cell; GO:0043227 membrane-bounded organelle; GO:0005576 extracellular region; GO:0043230 extracellular organelle;					IPR029058;	Alpha/Beta hydrolase fold;	S	KOG2931	Differentiation-related gene 1 protein (NDR1 protein), related proteins
P63010	AP-2 complex subunit beta OS=Homo sapiens OX=9606 GN=AP2B1 PE=1 SV=1	AP2B1	104.55	40.8	1.056	0.6744	plasma membrane	GO:0044085 cellular component biogenesis; GO:0044700 single organism signaling; GO:0031623 receptor internalization; GO:0001568 blood vessel development; GO:0007166 cell surface receptor signaling pathway; GO:0044699 single-organism process; GO:0031347 regulation of defense response; GO:0044237 cellular metabolic process; GO:0015031 protein transport; GO:0051234 establishment of localization; GO:…	GO:0016020 membrane; GO:0030119 AP-type membrane coat adaptor complex; GO:0031090 organelle membrane; GO:0045334 clathrin-coated endocytic vesicle; GO:0005737 cytoplasm; GO:0044433 cytoplasmic vesicle part; GO:0032991 macromolecular complex; GO:0036019 endolysosome; GO:0005623 cell; GO:0044422 organelle part; GO:0005765 lysosomal membrane; GO:0030136 clathrin-coated vesicle; GO:0005622 intracellu…	GO:0005048 signal sequence binding; GO:0030276 clathrin binding; GO:0008565 protein transporter activity; GO:0042277 peptide binding; GO:0005488 binding; GO:0044877 macromolecular complex binding; GO:0022892 substrate-specific transporter activity; GO:0005515 protein binding; GO:0033218 amide binding; GO:0032403 protein complex binding; GO:0005215 transporter activity;	K11825	AP2B1; AP-2 complex subunit beta-1	hsa04144 Endocytosis - Homo sapiens (human); hsa04721 Synaptic vesicle cycle - Homo sapiens (human); hsa04961 Endocrine and other factor-regulated calcium reabsorption - Homo sapiens (human); hsa05016 Huntington disease - Homo sapiens (human);	IPR008152; IPR011989; IPR002553; IPR013037; IPR015151; IPR012295; IPR016024; IPR009028; IPR013041;	Clathrin adaptor, alpha/beta/gamma-adaptin, appendage, Ig-like subdomain; Armadillo-like helical; Clathrin/coatomer adaptor, adaptin-like, N-terminal; Clathrin adaptor, beta-adaptin, appendage, Ig-like subdomain; Beta-adaptin appendage, C-terminal subdomain; Beta2-adaptin/TBP, C-terminal domain; Armadillo-type fold; Coatomer/calthrin adaptor appendage, C-terminal subdomain; Coatomer/clathrin adap…	U	KOG1061	Vesicle coat complex AP-1/AP-2/AP-4, beta subunit
Q92878	DNA repair protein RAD50 OS=Homo sapiens OX=9606 GN=RAD50 PE=1 SV=1	RAD50	153.89	7.7	1.106	0.087037	cytoplasm	GO:0065008 regulation of biological quality; GO:0032270 positive regulation of cellular protein metabolic process; GO:0022414 reproductive process; GO:0016233 telomere capping; GO:0032204 regulation of telomere maintenance; GO:0044237 cellular metabolic process; GO:0008152 metabolic process; GO:0044093 positive regulation of molecular function; GO:0044702 single organism reproductive process; GO:…	GO:0016020 membrane; GO:0000784 nuclear chromosome, telomeric region; GO:0000781 chromosome, telomeric region; GO:0032991 macromolecular complex; GO:0044424 intracellular part; GO:0005623 cell; GO:0044422 organelle part; GO:0044427 chromosomal part; GO:0043228 non-membrane-bounded organelle; GO:0000793 condensed chromosome; GO:0031974 membrane-enclosed lumen; GO:0005654 nucleoplasm; GO:0070013 in…	GO:1901265 nucleoside phosphate binding; GO:0003690 double-stranded DNA binding; GO:0004017 adenylate kinase activity; GO:0019205 nucleobase-containing compound kinase activity; GO:0003697 single-stranded DNA binding; GO:0042162 telomeric DNA binding; GO:0016817 hydrolase activity, acting on acid anhydrides; GO:0005515 protein binding; GO:0016787 hydrolase activity; GO:0019201 nucleotide kinase a…	K10866	RAD50; DNA repair protein RAD50 [EC:3.6.-.-]	hsa03440 Homologous recombination - Homo sapiens (human); hsa03450 Non-homologous end-joining - Homo sapiens (human); hsa04218 Cellular senescence - Homo sapiens (human);	IPR013134; IPR027417;	RAD50, zinc hook; P-loop containing nucleoside triphosphate hydrolase;	L	KOG0962	DNA repair protein RAD50, ABC-type ATPase/SMC superfamily
Q9H3Z4	DnaJ homolog subfamily C member 5 OS=Homo sapiens OX=9606 GN=DNAJC5 PE=1 SV=1	DNAJC5	22.149	8.6	3.211	0.000143954	cytoplasm	GO:0044700 single organism signaling; GO:0001505 regulation of neurotransmitter levels; GO:0010941 regulation of cell death; GO:0065008 regulation of biological quality; GO:0045321 leukocyte activation; GO:0043523 regulation of neuron apoptotic process; GO:0007269 neurotransmitter secretion; GO:0044699 single-organism process; GO:0099504 synaptic vesicle cycle; GO:0051234 establishment of localiz…	GO:0016020 membrane; GO:0044421 extracellular region part; GO:0031090 organelle membrane; GO:0005737 cytoplasm; GO:0044433 cytoplasmic vesicle part; GO:0005623 cell; GO:0044422 organelle part; GO:0070382 exocytic vesicle; GO:0070062 extracellular exosome; GO:0005765 lysosomal membrane; GO:0030136 clathrin-coated vesicle; GO:0008021 synaptic vesicle; GO:0005622 intracellular; GO:0005764 lysosome; …	GO:0097367 carbohydrate derivative binding; GO:0005515 protein binding; GO:0001948 glycoprotein binding; GO:0043008 ATP-dependent protein binding; GO:0005488 binding;	K09525	DNAJC5; DnaJ homolog subfamily C member 5	hsa04141 Protein processing in endoplasmic reticulum - Homo sapiens (human);	IPR001623;	DnaJ domain;	O	KOG0716	Molecular chaperone (DnaJ superfamily)
P21589	5'-nucleotidase OS=Homo sapiens OX=9606 GN=NT5E PE=1 SV=1	NT5E	63.367	31.9	1.618	0.00099878	peroxisome	GO:0042278 purine nucleoside metabolic process; GO:0046135 pyrimidine nucleoside catabolic process; GO:0009116 nucleoside metabolic process; GO:0019362 pyridine nucleotide metabolic process; GO:0009167 purine ribonucleoside monophosphate metabolic process; GO:0009117 nucleotide metabolic process; GO:0006196 AMP catabolic process; GO:0044699 single-organism process; GO:0009163 nucleoside biosynthe…	GO:0016020 membrane; GO:0044421 extracellular region part; GO:0071944 cell periphery; GO:0031982 vesicle; GO:0005737 cytoplasm; GO:0031225 anchored component of membrane; GO:0031224 intrinsic component of membrane; GO:0044424 intracellular part; GO:0005623 cell; GO:0005829 cytosol; GO:0005576 extracellular region; GO:0005886 plasma membrane; GO:0043226 organelle; GO:0070062 extracellular exosome;…	GO:1901265 nucleoside phosphate binding; GO:0016791 phosphatase activity; GO:0008252 nucleotidase activity; GO:0043167 ion binding; GO:0016787 hydrolase activity; GO:0000166 nucleotide binding; GO:1901363 heterocyclic compound binding; GO:0097159 organic cyclic compound binding; GO:0008253 5'-nucleotidase activity; GO:0003824 catalytic activity; GO:0042578 phosphoric ester hydrolase activity; GO:…	K19970	NT5E, CD73; 5'-nucleotidase [EC:3.1.3.5]	hsa00230 Purine metabolism - Homo sapiens (human); hsa00240 Pyrimidine metabolism - Homo sapiens (human); hsa00760 Nicotinate and nicotinamide metabolism - Homo sapiens (human); hsa01100 Metabolic pathways - Homo sapiens (human);	IPR029052; IPR004843; IPR008334;	Metallo-dependent phosphatase-like; Calcineurin-like phosphoesterase domain, ApaH type; 5'-Nucleotidase, C-terminal;	F	KOG4419	5' nucleotidase
Q14517	Protocadherin Fat 1 OS=Homo sapiens OX=9606 GN=FAT1 PE=1 SV=2	FAT1	506.27	1	1.344	0.035205	extracellular	GO:0044700 single organism signaling; GO:0016043 cellular component organization; GO:0016477 cell migration; GO:0051674 localization of cell; GO:0007015 actin filament organization; GO:0044699 single-organism process; GO:0022610 biological adhesion; GO:0009653 anatomical structure morphogenesis; GO:0016337 single organismal cell-cell adhesion; GO:0030036 actin cytoskeleton organization; GO:000715…	GO:0016020 membrane; GO:0044421 extracellular region part; GO:0071944 cell periphery; GO:0030054 cell junction; GO:0031982 vesicle; GO:0005737 cytoplasm; GO:0031224 intrinsic component of membrane; GO:0044424 intracellular part; GO:0005887 integral component of plasma membrane; GO:0098858 actin-based cell projection; GO:0005911 cell-cell junction; GO:0005623 cell; GO:0070062 extracellular exosome…	GO:0043169 cation binding; GO:0046872 metal ion binding; GO:0005515 protein binding; GO:0005509 calcium ion binding; GO:0005488 binding; GO:0043167 ion binding;	K16506	FAT1_2_3; protocadherin Fat 1/2/3		IPR015919; IPR001881; IPR000742; IPR013320; IPR001791; IPR002126;	Cadherin-like; EGF-like calcium-binding domain; EGF-like domain; Concanavalin A-like lectin/glucanase domain; Laminin G domain; Cadherin;	T	KOG1219	Uncharacterized conserved protein, contains laminin, cadherin and EGF domains
P31323	cAMP-dependent protein kinase type II-beta regulatory subunit OS=Homo sapiens OX=9606 GN=PRKAR2B PE=1 SV=3	PRKAR2B	46.302	19.4	1.28	0.65396	cytoplasm	GO:0044700 single organism signaling; GO:0044085 cellular component biogenesis; GO:0007596 blood coagulation; GO:0065008 regulation of biological quality; GO:0032270 positive regulation of cellular protein metabolic process; GO:0097332 response to antipsychotic drug; GO:0060271 cilium assembly; GO:0044255 cellular lipid metabolic process; GO:0044237 cellular metabolic process; GO:0050877 neurolog…	GO:0016020 membrane; GO:0030425 dendrite; GO:0044421 extracellular region part; GO:0031090 organelle membrane; GO:0071944 cell periphery; GO:0098857 membrane microdomain; GO:0031982 vesicle; GO:0005737 cytoplasm; GO:0043025 neuronal cell body; GO:0032991 macromolecular complex; GO:0044424 intracellular part; GO:0005623 cell; GO:0044422 organelle part; GO:0043197 dendritic spine; GO:0043228 non-me…	GO:0030291 protein serine/threonine kinase inhibitor activity; GO:0051018 protein kinase A binding; GO:1901265 nucleoside phosphate binding; GO:0031625 ubiquitin protein ligase binding; GO:0019901 protein kinase binding; GO:0004860 protein kinase inhibitor activity; GO:0005515 protein binding; GO:0019207 kinase regulator activity; GO:0004857 enzyme inhibitor activity; GO:0098772 molecular functio…	K04739	PRKAR; cAMP-dependent protein kinase regulator	hsa04910 Insulin signaling pathway - Homo sapiens (human);	IPR000595; IPR018490; IPR003117; IPR014710;	Cyclic nucleotide-binding domain; Cyclic nucleotide-binding-like; cAMP-dependent protein kinase regulatory subunit, dimerization-anchoring domain; RmlC-like jelly roll fold;	T	KOG1113	cAMP-dependent protein kinase types I and II, regulatory subunit
P28074	Proteasome subunit beta type-5 OS=Homo sapiens OX=9606 GN=PSMB5 PE=1 SV=3	PSMB5	28.48	25.9	1.132	0.031401	nucleus	GO:0044700 single organism signaling; GO:0065008 regulation of biological quality; GO:0032270 positive regulation of cellular protein metabolic process; GO:0002220 innate immune response activating cell surface receptor signaling pathway; GO:0007166 cell surface receptor signaling pathway; GO:0010608 posttranscriptional regulation of gene expression; GO:0051443 positive regulation of ubiquitin-pr…	GO:0044421 extracellular region part; GO:0031982 vesicle; GO:0005737 cytoplasm; GO:0032991 macromolecular complex; GO:0044424 intracellular part; GO:0005623 cell; GO:0044422 organelle part; GO:0043228 non-membrane-bounded organelle; GO:1905369 endopeptidase complex; GO:0005856 cytoskeleton; GO:0031974 membrane-enclosed lumen; GO:0070062 extracellular exosome; GO:0005815 microtubule organizing cen…	GO:0004175 endopeptidase activity; GO:0004298 threonine-type endopeptidase activity; GO:0008233 peptidase activity; GO:0070003 threonine-type peptidase activity; GO:0003824 catalytic activity; GO:0005488 binding; GO:0070011 peptidase activity, acting on L-amino acid peptides; GO:0016787 hydrolase activity; GO:0005515 protein binding;	K02737	PSMB5; 20S proteasome subunit beta 5 [EC:3.4.25.1]	hsa03050 Proteasome - Homo sapiens (human);	IPR029055;	Nucleophile aminohydrolases, N-terminal;	O	KOG0175	20S proteasome, regulatory subunit beta type PSMB5/PSMB8/PRE2
O94979	Protein transport protein Sec31A OS=Homo sapiens OX=9606 GN=SEC31A PE=1 SV=3	SEC31A	133.01	20.2	0.787	0.081039	nucleus	GO:0044700 single organism signaling; GO:0044085 cellular component biogenesis; GO:0006901 vesicle coating; GO:0048207 vesicle targeting, rough ER to cis-Golgi; GO:0048208 COPII vesicle coating; GO:0044699 single-organism process; GO:0015031 protein transport; GO:0030968 endoplasmic reticulum unfolded protein response; GO:0051234 establishment of localization; GO:0007165 signal transduction; GO:0…	GO:0030658 transport vesicle membrane; GO:0016020 membrane; GO:0042175 nuclear outer membrane-endoplasmic reticulum membrane network; GO:0005783 endoplasmic reticulum; GO:0031090 organelle membrane; GO:0031410 cytoplasmic vesicle; GO:0098796 membrane protein complex; GO:0031982 vesicle; GO:0005737 cytoplasm; GO:0044433 cytoplasmic vesicle part; GO:0032991 macromolecular complex; GO:0044424 intrac…	GO:0005515 protein binding; GO:0048306 calcium-dependent protein binding; GO:0005488 binding;	K14005	SEC31; protein transport protein SEC31	hsa04141 Protein processing in endoplasmic reticulum - Homo sapiens (human);	IPR017986; IPR015943; IPR024298;	WD40-repeat-containing domain; WD40/YVTN repeat-like-containing domain; Ancestral coatomer element 1, Sec16/Sec31;	U	KOG0307	Vesicle coat complex COPII, subunit SEC31
Q9NRL2	Bromodomain adjacent to zinc finger domain protein 1A OS=Homo sapiens OX=9606 GN=BAZ1A PE=1 SV=2	BAZ1A	178.7	0.7			nucleus	GO:0050794 regulation of cellular process; GO:0016043 cellular component organization; GO:0006338 chromatin remodeling; GO:0006260 DNA replication; GO:0006725 cellular aromatic compound metabolic process; GO:0006259 DNA metabolic process; GO:0097659 nucleic acid-templated transcription; GO:0060255 regulation of macromolecule metabolic process; GO:0019219 regulation of nucleobase-containing compou…	GO:0043229 intracellular organelle; GO:0016590 ACF complex; GO:0044446 intracellular organelle part; GO:0008623 CHRAC; GO:0032991 macromolecular complex; GO:0044424 intracellular part; GO:0070603 SWI/SNF superfamily-type complex; GO:0005623 cell; GO:0044422 organelle part; GO:0031010 ISWI-type complex; GO:0043231 intracellular membrane-bounded organelle; GO:0043226 organelle; GO:0005634 nucleus; …	GO:0046914 transition metal ion binding; GO:0005488 binding; GO:0043167 ion binding; GO:0043169 cation binding; GO:0046872 metal ion binding; GO:0005515 protein binding; GO:0008270 zinc ion binding;	K11655	BAZ1A, ACF1; bromodomain adjacent to zinc finger domain protein 1A		IPR001965; IPR001487; IPR028942; IPR018501; IPR013083; IPR013136; IPR011011; IPR019787; IPR028941;	Zinc finger, PHD-type; Bromodomain; WHIM1 domain; DDT domain; Zinc finger, RING/FYVE/PHD-type; WSTF/Acf1/Cbp146; Zinc finger, FYVE/PHD-type; Zinc finger, PHD-finger; WHIM2 domain;	B	KOG1245	Chromatin remodeling complex WSTF-ISWI, large subunit (contains heterochromatin localization, PHD and BROMO domains)
Q99700	Ataxin-2 OS=Homo sapiens OX=9606 GN=ATXN2 PE=1 SV=2	ATXN2	140.28	9	1.263	0.047481	mitochondria	GO:0060627 regulation of vesicle-mediated transport; GO:0044085 cellular component biogenesis; GO:0050658 RNA transport; GO:0022613 ribonucleoprotein complex biogenesis; GO:0022618 ribonucleoprotein complex assembly; GO:0010608 posttranscriptional regulation of gene expression; GO:0051129 negative regulation of cellular component organization; GO:0044237 cellular metabolic process; GO:1902115 reg…	GO:0010494 cytoplasmic stress granule; GO:0043229 intracellular organelle; GO:0016020 membrane; GO:0043232 intracellular non-membrane-bounded organelle; GO:0044446 intracellular organelle part; GO:0005737 cytoplasm; GO:0012505 endomembrane system; GO:0032991 macromolecular complex; GO:0044424 intracellular part; GO:0005623 cell; GO:0044422 organelle part; GO:0036464 cytoplasmic ribonucleoprotein …	GO:0097159 organic cyclic compound binding; GO:1901363 heterocyclic compound binding; GO:0003723 RNA binding; GO:0005154 epidermal growth factor receptor binding; GO:0005102 receptor binding; GO:0005488 binding; GO:0003676 nucleic acid binding; GO:0070851 growth factor receptor binding; GO:0008022 protein C-terminus binding; GO:0005515 protein binding;				IPR009604; IPR025852; IPR009818; IPR010920;	LsmAD domain; Ataxin 2, SM domain; Ataxin-2, C-terminal; LSM domain;	A	KOG2375	Protein interacting with poly(A)-binding protein
Q8ND24	RING finger protein 214 OS=Homo sapiens OX=9606 GN=RNF214 PE=1 SV=2	RNF214	77.667	3.1	1.671	0.00143997	cytoplasm			GO:0046914 transition metal ion binding; GO:0005488 binding; GO:0043167 ion binding; GO:0043169 cation binding; GO:0046872 metal ion binding; GO:0005515 protein binding; GO:0008270 zinc ion binding;				IPR001841; IPR013083;	Zinc finger, RING-type; Zinc finger, RING/FYVE/PHD-type;
Q01831	DNA repair protein complementing XP-C cells OS=Homo sapiens OX=9606 GN=XPC PE=1 SV=4	XPC	105.95	1.3	1.489	0.53444	nucleus	GO:0044085 cellular component biogenesis; GO:0006289 nucleotide-excision repair; GO:0034644 cellular response to UV; GO:0032392 DNA geometric change; GO:0031573 intra-S DNA damage checkpoint; GO:0044699 single-organism process; GO:0010564 regulation of cell cycle process; GO:0044237 cellular metabolic process; GO:0009605 response to external stimulus; GO:0045930 negative regulation of mitotic cel…	GO:0016020 membrane; GO:0044421 extracellular region part; GO:0071944 cell periphery; GO:0031982 vesicle; GO:0005737 cytoplasm; GO:0032991 macromolecular complex; GO:0044424 intracellular part; GO:0005623 cell; GO:0044422 organelle part; GO:0043228 non-membrane-bounded organelle; GO:0070062 extracellular exosome; GO:0031974 membrane-enclosed lumen; GO:0005654 nucleoplasm; GO:0070013 intracellular…	GO:0097159 organic cyclic compound binding; GO:1901363 heterocyclic compound binding; GO:0000405 bubble DNA binding; GO:0032135 DNA insertion or deletion binding; GO:0003677 DNA binding; GO:0000404 heteroduplex DNA loop binding; GO:0030983 mismatched DNA binding; GO:0003690 double-stranded DNA binding; GO:0005488 binding; GO:0003676 nucleic acid binding; GO:0003697 single-stranded DNA binding; GO…	K10838	XPC; xeroderma pigmentosum group C-complementing protein	hsa03420 Nucleotide excision repair - Homo sapiens (human);	IPR018328; IPR018326; IPR018325; IPR018327;	Rad4 beta-hairpin domain 3; Rad4 beta-hairpin domain 1; Rad4/PNGase transglutaminase-like fold; Rad4 beta-hairpin domain 2;	L	KOG2179	Nucleotide excision repair complex XPC-HR23B, subunit XPC/DPB11
Q06124	Tyrosine-protein phosphatase non-receptor type 11 OS=Homo sapiens OX=9606 GN=PTPN11 PE=1 SV=2	PTPN11	68.436	33	1.091	0.60052	cytoplasm	GO:0044700 single organism signaling; GO:0002694 regulation of leukocyte activation; GO:0090130 tissue migration; GO:0048008 platelet-derived growth factor receptor signaling pathway; GO:0022414 reproductive process; GO:0050796 regulation of insulin secretion; GO:0042593 glucose homeostasis; GO:0044255 cellular lipid metabolic process; GO:0031347 regulation of defense response; GO:0044237 cellula…	GO:0043226 organelle; GO:0043231 intracellular membrane-bounded organelle; GO:0043229 intracellular organelle; GO:0005634 nucleus; GO:0044464 cell part; GO:0005622 intracellular; GO:0005737 cytoplasm; GO:0032991 macromolecular complex; GO:0044424 intracellular part; GO:0005829 cytosol; GO:0043234 protein complex; GO:0043227 membrane-bounded organelle; GO:0005623 cell; GO:0005739 mitochondrion; GO…	GO:0043274 phospholipase binding; GO:0016773 phosphotransferase activity, alcohol group as acceptor; GO:1990782 protein tyrosine kinase binding; GO:0005102 receptor binding; GO:0016791 phosphatase activity; GO:0019901 protein kinase binding; GO:0005515 protein binding; GO:0016787 hydrolase activity; GO:0004721 phosphoprotein phosphatase activity; GO:0051427 hormone receptor binding; GO:0050780 do…	K07293	PTPN11; tyrosine-protein phosphatase non-receptor type 11 [EC:3.1.3.48]	hsa04014 Ras signaling pathway - Homo sapiens (human); hsa04072 Phospholipase D signaling pathway - Homo sapiens (human); hsa04360 Axon guidance - Homo sapiens (human); hsa04625 C-type lectin receptor signaling pathway - Homo sapiens (human); hsa04630 JAK-STAT signaling pathway - Homo sapiens (human); hsa04650 Natural killer cell mediated cytotoxicity - Homo sapiens (human); hsa04670 Leukocyte tr…	IPR029021; IPR000387; IPR000980; IPR003595; IPR000242;	Protein-tyrosine phosphatase-like; Tyrosine specific protein phosphatases domain; SH2 domain; Protein-tyrosine phosphatase, catalytic; PTP type protein phosphatase;	T	KOG0790	Protein tyrosine phosphatase Corkscrew and related SH2 domain enzymes
Q4V328	GRIP1-associated protein 1 OS=Homo sapiens OX=9606 GN=GRIPAP1 PE=1 SV=2	GRIPAP1	96.004	2.3	1.171	0.191338	cytoplasm	GO:0050794 regulation of cellular process; GO:0016043 cellular component organization; GO:0010256 endomembrane system organization; GO:0065008 regulation of biological quality; GO:0035418 protein localization to synapse; GO:1903539 protein localization to postsynaptic membrane; GO:0044699 single-organism process; GO:0090002 establishment of protein localization to plasma membrane; GO:1905244 regu…	GO:0044421 extracellular region part; GO:0005615 extracellular space; GO:0031410 cytoplasmic vesicle; GO:0005737 cytoplasm; GO:0031982 vesicle; GO:0044424 intracellular part; GO:0005623 cell; GO:0044422 organelle part; GO:0005769 early endosome; GO:0055037 recycling endosome; GO:0031974 membrane-enclosed lumen; GO:0005654 nucleoplasm; GO:0070013 intracellular organelle lumen; GO:0005622 intracell…	GO:0005515 protein binding; GO:0005488 binding;
P27707	Deoxycytidine kinase OS=Homo sapiens OX=9606 GN=DCK PE=1 SV=1	DCK	30.518	29.2	2.066	4.2275e-06	nucleus	GO:0016310 phosphorylation; GO:0009116 nucleoside metabolic process; GO:0009165 nucleotide biosynthetic process; GO:0006725 cellular aromatic compound metabolic process; GO:0009117 nucleotide metabolic process; GO:0009157 deoxyribonucleoside monophosphate biosynthetic process; GO:0044699 single-organism process; GO:0009163 nucleoside biosynthetic process; GO:0009058 biosynthetic process; GO:19015…	GO:0043226 organelle; GO:0043231 intracellular membrane-bounded organelle; GO:0043229 intracellular organelle; GO:0005634 nucleus; GO:0044464 cell part; GO:0005622 intracellular; GO:0005737 cytoplasm; GO:0044424 intracellular part; GO:0043227 membrane-bounded organelle; GO:0005829 cytosol; GO:0005623 cell; GO:0044444 cytoplasmic part;	GO:1901265 nucleoside phosphate binding; GO:0004137 deoxycytidine kinase activity; GO:0046983 protein dimerization activity; GO:0019205 nucleobase-containing compound kinase activity; GO:0005515 protein binding; GO:0019136 deoxynucleoside kinase activity; GO:0097159 organic cyclic compound binding; GO:1901363 heterocyclic compound binding; GO:0042802 identical protein binding; GO:0016301 kinase a…	K00893	DCK; deoxycitidine kinase [EC:2.7.1.74]	hsa00230 Purine metabolism - Homo sapiens (human); hsa00240 Pyrimidine metabolism - Homo sapiens (human); hsa01100 Metabolic pathways - Homo sapiens (human);	IPR027417; IPR031314;	P-loop containing nucleoside triphosphate hydrolase; Deoxynucleoside kinase domain;	F	KOG4235	Mitochondrial thymidine kinase 2/deoxyguanosine kinase
Q92626	Peroxidasin homolog OS=Homo sapiens OX=9606 GN=PXDN PE=1 SV=2	PXDN	165.27	25.2	7.803	4.6772e-07	extracellular	GO:0050794 regulation of cellular process; GO:0016043 cellular component organization; GO:0009968 negative regulation of signal transduction; GO:0023051 regulation of signaling; GO:0001959 regulation of cytokine-mediated signaling pathway; GO:0044699 single-organism process; GO:0048519 negative regulation of biological process; GO:0048523 negative regulation of cellular process; GO:0050896 respon…	GO:0043229 intracellular organelle; GO:0005615 extracellular space; GO:0044421 extracellular region part; GO:0005783 endoplasmic reticulum; GO:0031982 vesicle; GO:0005737 cytoplasm; GO:0012505 endomembrane system; GO:0044424 intracellular part; GO:0005623 cell; GO:0005576 extracellular region; GO:0070062 extracellular exosome; GO:0043231 intracellular membrane-bounded organelle; GO:0043226 organe…	GO:0005102 receptor binding; GO:0019838 growth factor binding; GO:0019966 interleukin-1 binding; GO:0043167 ion binding; GO:0005126 cytokine receptor binding; GO:0016209 antioxidant activity; GO:0005515 protein binding; GO:0098772 molecular function regulator; GO:0016491 oxidoreductase activity; GO:0097159 organic cyclic compound binding; GO:1901363 heterocyclic compound binding; GO:0005152 inter…	K19511	PXDN, VPO1; peroxidase [EC:1.11.1.7]		IPR003598; IPR007110; IPR000483; IPR013783; IPR001007; IPR003599; IPR032675; IPR013098;	Immunoglobulin subtype 2; Immunoglobulin-like domain; Cysteine-rich flanking region, C-terminal; Immunoglobulin-like fold; VWFC domain; Immunoglobulin subtype; Leucine-rich repeat domain, L domain-like; Immunoglobulin I-set;	R	KOG2408	Peroxidase/oxygenase
Q10570	Cleavage and polyadenylation specificity factor subunit 1 OS=Homo sapiens OX=9606 GN=CPSF1 PE=1 SV=2	CPSF1	160.88	2.8	2.756	0.139101	nucleus	GO:0050658 RNA transport; GO:0097659 nucleic acid-templated transcription; GO:0009058 biosynthetic process; GO:0051168 nuclear export; GO:0051169 nuclear transport; GO:0044237 cellular metabolic process; GO:0015031 protein transport; GO:0051234 establishment of localization; GO:0006353 DNA-templated transcription, termination; GO:0071427 mRNA-containing ribonucleoprotein complex export from nucle…	GO:0043229 intracellular organelle; GO:0005847 mRNA cleavage and polyadenylation specificity factor complex; GO:0044446 intracellular organelle part; GO:0031981 nuclear lumen; GO:0032991 macromolecular complex; GO:0044424 intracellular part; GO:0005623 cell; GO:0044422 organelle part; GO:0005849 mRNA cleavage factor complex; GO:0031974 membrane-enclosed lumen; GO:0043231 intracellular membrane-bo…	GO:0097159 organic cyclic compound binding; GO:1901363 heterocyclic compound binding; GO:0003729 mRNA binding; GO:0003723 RNA binding; GO:0017091 AU-rich element binding; GO:0003730 mRNA 3'-UTR binding; GO:0005488 binding; GO:0003676 nucleic acid binding; GO:0005515 protein binding; GO:0035925 mRNA 3'-UTR AU-rich region binding; GO:0019899 enzyme binding;	K14401	CPSF1, CFT1; cleavage and polyadenylation specificity factor subunit 1	hsa03015 mRNA surveillance pathway - Homo sapiens (human);	IPR004871;	Cleavage/polyadenylation specificity factor, A subunit, C-terminal;	A	KOG1896	mRNA cleavage and polyadenylation factor II complex, subunit CFT1 (CPSF subunit)
O75116	Rho-associated protein kinase 2 OS=Homo sapiens OX=9606 GN=ROCK2 PE=1 SV=4	ROCK2	160.9	22.5	0.835	0.003424	nucleus	GO:0044700 single organism signaling; GO:0019079 viral genome replication; GO:0030335 positive regulation of cell migration; GO:0032270 positive regulation of cellular protein metabolic process; GO:0007166 cell surface receptor signaling pathway; GO:0090002 establishment of protein localization to plasma membrane; GO:0010564 regulation of cell cycle process; GO:0044237 cellular metabolic process;…	GO:0043229 intracellular organelle; GO:0016020 membrane; GO:0043232 intracellular non-membrane-bounded organelle; GO:0071944 cell periphery; GO:0044430 cytoskeletal part; GO:0044446 intracellular organelle part; GO:0005737 cytoplasm; GO:0032991 macromolecular complex; GO:0044424 intracellular part; GO:0005829 cytosol; GO:0005623 cell; GO:0044422 organelle part; GO:0036464 cytoplasmic ribonucleopr…	GO:1901265 nucleoside phosphate binding; GO:0016773 phosphotransferase activity, alcohol group as acceptor; GO:0005515 protein binding; GO:0004672 protein kinase activity; GO:1901363 heterocyclic compound binding; GO:0097159 organic cyclic compound binding; GO:0016301 kinase activity; GO:0032553 ribonucleotide binding; GO:0003824 catalytic activity; GO:0017016 Ras GTPase binding; GO:0005488 bindi…	K17388	ROCK2; Rho-associated protein kinase 2 [EC:2.7.11.1]	hsa04022 cGMP-PKG signaling pathway - Homo sapiens (human); hsa04024 cAMP signaling pathway - Homo sapiens (human); hsa04062 Chemokine signaling pathway - Homo sapiens (human); hsa04071 Sphingolipid signaling pathway - Homo sapiens (human); hsa04270 Vascular smooth muscle contraction - Homo sapiens (human); hsa04310 Wnt signaling pathway - Homo sapiens (human); hsa04360 Axon guidance - Homo sapie…	IPR002219; IPR015008; IPR000719; IPR011993; IPR000961; IPR011009; IPR001849;	Protein kinase C-like, phorbol ester/diacylglycerol-binding domain; Rho binding domain; Protein kinase domain; PH domain-like; AGC-kinase, C-terminal; Protein kinase-like domain; Pleckstrin homology domain;	T	KOG0612	Rho-associated, coiled-coil containing protein kinase
Q9HA92	Radical S-adenosyl methionine domain-containing protein 1, mitochondrial OS=Homo sapiens OX=9606 GN=RSAD1 PE=1 SV=2	RSAD1	48.713	1.6	0.546	0.037078	mitochondria	GO:0051188 cofactor biosynthetic process; GO:0018130 heterocycle biosynthetic process; GO:0006725 cellular aromatic compound metabolic process; GO:0055114 oxidation-reduction process; GO:0006779 porphyrin-containing compound biosynthetic process; GO:1901360 organic cyclic compound metabolic process; GO:0044699 single-organism process; GO:0006807 nitrogen compound metabolic process; GO:0009058 bio…	GO:0043226 organelle; GO:0043231 intracellular membrane-bounded organelle; GO:0043229 intracellular organelle; GO:0044464 cell part; GO:0005622 intracellular; GO:0005737 cytoplasm; GO:0044424 intracellular part; GO:0043227 membrane-bounded organelle; GO:0005623 cell; GO:0005739 mitochondrion; GO:0044444 cytoplasmic part;	GO:0016627 oxidoreductase activity, acting on the CH-CH group of donors; GO:0016634 oxidoreductase activity, acting on the CH-CH group of donors, oxygen as acceptor; GO:0003824 catalytic activity; GO:0051536 iron-sulfur cluster binding; GO:0005488 binding; GO:0043167 ion binding; GO:0043169 cation binding; GO:0046872 metal ion binding; GO:0004109 coproporphyrinogen oxidase activity; GO:0051539 4 …				IPR006638; IPR023404; IPR007197; IPR010723;	Elongator protein 3/MiaB/NifB; Radical SAM, alpha/beta horseshoe; Radical SAM; HemN, C-terminal;
O43175	D-3-phosphoglycerate dehydrogenase OS=Homo sapiens OX=9606 GN=PHGDH PE=1 SV=4	PHGDH	56.65	35.5	0.849	0.083963	cytoplasm	GO:0016053 organic acid biosynthetic process; GO:0043009 chordate embryonic development; GO:0007420 brain development; GO:0048666 neuron development; GO:0048869 cellular developmental process; GO:0022008 neurogenesis; GO:0044699 single-organism process; GO:0009058 biosynthetic process; GO:0006544 glycine metabolic process; GO:0044237 cellular metabolic process; GO:0008152 metabolic process; GO:00…	GO:0044421 extracellular region part; GO:0031982 vesicle; GO:0005737 cytoplasm; GO:0044424 intracellular part; GO:0005829 cytosol; GO:0005623 cell; GO:0005576 extracellular region; GO:0043226 organelle; GO:0070062 extracellular exosome; GO:0043209 myelin sheath; GO:0005622 intracellular; GO:0044464 cell part; GO:1903561 extracellular vesicle; GO:0043227 membrane-bounded organelle; GO:0043230 extr…	GO:0097159 organic cyclic compound binding; GO:1901363 heterocyclic compound binding; GO:0016614 oxidoreductase activity, acting on CH-OH group of donors; GO:0009055 electron carrier activity; GO:0016616 oxidoreductase activity, acting on the CH-OH group of donors, NAD or NADP as acceptor; GO:1901265 nucleoside phosphate binding; GO:0051287 NAD binding; GO:0003824 catalytic activity; GO:0005488 b…	K00058	serA, PHGDH; D-3-phosphoglycerate dehydrogenase / 2-oxoglutarate reductase [EC:1.1.1.95 1.1.1.399]	hsa00260 Glycine, serine and threonine metabolism - Homo sapiens (human); hsa00270 Cysteine and methionine metabolism - Homo sapiens (human); hsa01100 Metabolic pathways - Homo sapiens (human); hsa01200 Carbon metabolism - Homo sapiens (human); hsa01230 Biosynthesis of amino acids - Homo sapiens (human);	IPR006139; IPR006140; IPR029009; IPR016040;	D-isomer specific 2-hydroxyacid dehydrogenase, catalytic domain; D-isomer specific 2-hydroxyacid dehydrogenase, NAD-binding domain; Allosteric substrate binding domain; NAD(P)-binding domain;	E	KOG0068	D-3-phosphoglycerate dehydrogenase, D-isomer-specific 2-hydroxy acid dehydrogenase superfamily
Q96PV6	Leukocyte receptor cluster member 8 OS=Homo sapiens OX=9606 GN=LENG8 PE=1 SV=3	LENG8	88.156	1.8	4.544	0.0012041	nucleus			GO:0005515 protein binding; GO:0005488 binding;
P36871	Phosphoglucomutase-1 OS=Homo sapiens OX=9606 GN=PGM1 PE=1 SV=3	PGM1	61.448	44.1	1.528	5.7495e-05	cytoplasm	GO:0009116 nucleoside metabolic process; GO:0045321 leukocyte activation; GO:0006165 nucleoside diphosphate phosphorylation; GO:0019362 pyridine nucleotide metabolic process; GO:0006096 glycolytic process; GO:0009185 ribonucleoside diphosphate metabolic process; GO:0044237 cellular metabolic process; GO:0044264 cellular polysaccharide metabolic process; GO:0006006 glucose metabolic process; GO:00…	GO:1904724 tertiary granule lumen; GO:0044421 extracellular region part; GO:0031410 cytoplasmic vesicle; GO:0005737 cytoplasm; GO:0031982 vesicle; GO:0044433 cytoplasmic vesicle part; GO:0044424 intracellular part; GO:0005623 cell; GO:1904813 ficolin-1-rich granule lumen; GO:0044422 organelle part; GO:0043228 non-membrane-bounded organelle; GO:0070062 extracellular exosome; GO:0005856 cytoskeleto…	GO:0000287 magnesium ion binding; GO:0016853 isomerase activity; GO:0003824 catalytic activity; GO:0004614 phosphoglucomutase activity; GO:0005488 binding; GO:0016868 intramolecular transferase activity, phosphotransferases; GO:0043167 ion binding; GO:0046872 metal ion binding; GO:0043169 cation binding; GO:0005515 protein binding; GO:0016866 intramolecular transferase activity;	K01835	pgm; phosphoglucomutase [EC:5.4.2.2]	hsa00010 Glycolysis / Gluconeogenesis - Homo sapiens (human); hsa00030 Pentose phosphate pathway - Homo sapiens (human); hsa00052 Galactose metabolism - Homo sapiens (human); hsa00230 Purine metabolism - Homo sapiens (human); hsa00500 Starch and sucrose metabolism - Homo sapiens (human); hsa00520 Amino sugar and nucleotide sugar metabolism - Homo sapiens (human); hsa01100 Metabolic pathways - Hom…	IPR005846; IPR005843; IPR005845; IPR016055; IPR005844;	Alpha-D-phosphohexomutase, alpha/beta/alpha domain III; Alpha-D-phosphohexomutase, C-terminal; Alpha-D-phosphohexomutase, alpha/beta/alpha domain II; Alpha-D-phosphohexomutase, alpha/beta/alpha I/II/III; Alpha-D-phosphohexomutase, alpha/beta/alpha domain I;
Q9UQ35	Serine/arginine repetitive matrix protein 2 OS=Homo sapiens OX=9606 GN=SRRM2 PE=1 SV=2	SRRM2	299.61	7.9	1.216	0.08526	nucleus	GO:0006396 RNA processing; GO:0006725 cellular aromatic compound metabolic process; GO:1901360 organic cyclic compound metabolic process; GO:0006807 nitrogen compound metabolic process; GO:0044238 primary metabolic process; GO:0044237 cellular metabolic process; GO:0071704 organic substance metabolic process; GO:0006397 mRNA processing; GO:0016070 RNA metabolic process; GO:0000398 mRNA splicing, …	GO:0043229 intracellular organelle; GO:0044446 intracellular organelle part; GO:0032991 macromolecular complex; GO:0031981 nuclear lumen; GO:0044424 intracellular part; GO:0005681 spliceosomal complex; GO:0016604 nuclear body; GO:0005623 cell; GO:0015030 Cajal body; GO:0044422 organelle part; GO:0043226 organelle; GO:0043231 intracellular membrane-bounded organelle; GO:0031974 membrane-enclosed l…	GO:0097159 organic cyclic compound binding; GO:1901363 heterocyclic compound binding; GO:0003723 RNA binding; GO:0047485 protein N-terminus binding; GO:0005488 binding; GO:0003676 nucleic acid binding; GO:0070742 C2H2 zinc finger domain binding; GO:0005515 protein binding; GO:0019904 protein domain specific binding;	K13172	SRRM2, SRM300; serine/arginine repetitive matrix protein 2		IPR024945; IPR013170;	Spt5 C-terminal domain; mRNA splicing factor Cwf21 domain;	A	KOG1869	Splicing coactivator SRm160/300, subunit SRm300
O75569	Interferon-inducible double-stranded RNA-dependent protein kinase activator A OS=Homo sapiens OX=9606 GN=PRKRA PE=1 SV=1	PRKRA	34.404	24.3	1.155	0.157081	cytoplasm	GO:0010941 regulation of cell death; GO:0010608 posttranscriptional regulation of gene expression; GO:0042474 middle ear morphogenesis; GO:0044237 cellular metabolic process; GO:0009607 response to biotic stimulus; GO:0008285 negative regulation of cell proliferation; GO:0009605 response to external stimulus; GO:0008152 metabolic process; GO:0048562 embryonic organ morphogenesis; GO:0044093 posit…	GO:0043229 intracellular organelle; GO:0016020 membrane; GO:0044446 intracellular organelle part; GO:0005737 cytoplasm; GO:0031981 nuclear lumen; GO:0044424 intracellular part; GO:0005623 cell; GO:0005829 cytosol; GO:0044422 organelle part; GO:0043226 organelle; GO:0043231 intracellular membrane-bounded organelle; GO:0031974 membrane-enclosed lumen; GO:0005634 nucleus; GO:0005654 nucleoplasm; GO:…	GO:0097159 organic cyclic compound binding; GO:1901363 heterocyclic compound binding; GO:0003723 RNA binding; GO:0042802 identical protein binding; GO:0030234 enzyme regulator activity; GO:0042803 protein homodimerization activity; GO:0003725 double-stranded RNA binding; GO:0005488 binding; GO:0046983 protein dimerization activity; GO:0003676 nucleic acid binding; GO:0005515 protein binding; GO:0…				IPR014720; IPR032478;	Double-stranded RNA-binding domain; Staufen, C-terminal;	UK	KOG3732	Staufen and related double-stranded-RNA-binding proteins
Q8NE71	ATP-binding cassette sub-family F member 1 OS=Homo sapiens OX=9606 GN=ABCF1 PE=1 SV=2	ABCF1	95.925	19.6	1.24	0.061957	nucleus	GO:0006518 peptide metabolic process; GO:0032270 positive regulation of cellular protein metabolic process; GO:0010608 posttranscriptional regulation of gene expression; GO:0009891 positive regulation of biosynthetic process; GO:0009058 biosynthetic process; GO:0044237 cellular metabolic process; GO:0051234 establishment of localization; GO:0008152 metabolic process; GO:0009893 positive regulatio…	GO:0016020 membrane; GO:0005737 cytoplasm; GO:0032991 macromolecular complex; GO:0044424 intracellular part; GO:0005623 cell; GO:0044422 organelle part; GO:0043228 non-membrane-bounded organelle; GO:0031974 membrane-enclosed lumen; GO:0005654 nucleoplasm; GO:0070013 intracellular organelle lumen; GO:0005622 intracellular; GO:0044464 cell part; GO:0043227 membrane-bounded organelle; GO:0043233 org…	GO:1901265 nucleoside phosphate binding; GO:0090079 translation regulator activity, nucleic acid binding; GO:0016817 hydrolase activity, acting on acid anhydrides; GO:0016787 hydrolase activity; GO:0005515 protein binding; GO:0045182 translation regulator activity; GO:0016887 ATPase activity; GO:1901363 heterocyclic compound binding; GO:0097159 organic cyclic compound binding; GO:0016462 pyrophos…	K06184	ABCF1; ATP-binding cassette, subfamily F, member 1		IPR003593; IPR032781; IPR003439; IPR027417;	AAA+ ATPase domain; ABC-transporter extension domain; ABC transporter-like; P-loop containing nucleoside triphosphate hydrolase;	J	KOG0066	eIF2-interacting protein ABC50 (ABC superfamily)
O15379	Histone deacetylase 3 OS=Homo sapiens OX=9606 GN=HDAC3 PE=1 SV=2	HDAC3	48.847	2.3	3.207	2.3963e-05	cytoplasm	GO:0044085 cellular component biogenesis; GO:0065008 regulation of biological quality; GO:0032872 regulation of stress-activated MAPK cascade; GO:0010941 regulation of cell death; GO:0032270 positive regulation of cellular protein metabolic process; GO:0097659 nucleic acid-templated transcription; GO:1903533 regulation of protein targeting; GO:0009891 positive regulation of biosynthetic process; …	GO:0016020 membrane; GO:0005874 microtubule; GO:0071944 cell periphery; GO:0005737 cytoplasm; GO:0032991 macromolecular complex; GO:0099512 supramolecular fiber; GO:0044424 intracellular part; GO:0017053 transcriptional repressor complex; GO:0099080 supramolecular complex; GO:0005623 cell; GO:0044422 organelle part; GO:0000118 histone deacetylase complex; GO:0043228 non-membrane-bounded organelle…	GO:0003714 transcription corepressor activity; GO:0032041 NAD-dependent histone deacetylase activity (H3-K14 specific); GO:0017136 NAD-dependent histone deacetylase activity; GO:0005515 protein binding; GO:0016787 hydrolase activity; GO:0003682 chromatin binding; GO:0003712 transcription cofactor activity; GO:0030332 cyclin binding; GO:0004407 histone deacetylase activity; GO:0031078 histone deac…	K11404	HDAC3; histone deacetylase 3 [EC:3.5.1.98]	hsa04919 Thyroid hormone signaling pathway - Homo sapiens (human); hsa05034 Alcoholism - Homo sapiens (human); hsa05203 Viral carcinogenesis - Homo sapiens (human);	IPR023801;	Histone deacetylase domain;	B	KOG1342	Histone deacetylase complex, catalytic component RPD3
Q9HBK9	Arsenite methyltransferase OS=Homo sapiens OX=9606 GN=AS3MT PE=1 SV=3	AS3MT	41.747	10.4	0.763	0.052359	cytoplasm	GO:0071466 cellular response to xenobiotic stimulus; GO:0051716 cellular response to stimulus; GO:0009404 toxin metabolic process; GO:0044281 small molecule metabolic process; GO:0044763 single-organism cellular process; GO:0044699 single-organism process; GO:0050896 response to stimulus; GO:0044237 cellular metabolic process; GO:0032259 methylation; GO:0071704 organic substance metabolic process…	GO:0043226 organelle; GO:0043231 intracellular membrane-bounded organelle; GO:0043229 intracellular organelle; GO:0044464 cell part; GO:0005622 intracellular; GO:0005737 cytoplasm; GO:0044424 intracellular part; GO:0043227 membrane-bounded organelle; GO:0005623 cell; GO:0005829 cytosol; GO:0005739 mitochondrion; GO:0044444 cytoplasmic part;	GO:0008757 S-adenosylmethionine-dependent methyltransferase activity; GO:0016741 transferase activity, transferring one-carbon groups; GO:0030792 methylarsonite methyltransferase activity; GO:0008168 methyltransferase activity; GO:0003824 catalytic activity; GO:0016740 transferase activity; GO:0030791 arsenite methyltransferase activity;	K07755	AS3MT; arsenite methyltransferase [EC:2.1.1.137]		IPR025714; IPR029063;	Methyltransferase domain; S-adenosyl-L-methionine-dependent methyltransferase;
Q12923	Tyrosine-protein phosphatase non-receptor type 13 OS=Homo sapiens OX=9606 GN=PTPN13 PE=1 SV=2	PTPN13	276.9	1	1.972	0.0033397	nucleus	GO:0050794 regulation of cellular process; GO:0046486 glycerolipid metabolic process; GO:0006661 phosphatidylinositol biosynthetic process; GO:0023051 regulation of signaling; GO:0008654 phospholipid biosynthetic process; GO:0044267 cellular protein metabolic process; GO:0044699 single-organism process; GO:0044255 cellular lipid metabolic process; GO:0009058 biosynthetic process; GO:0044237 cellu…	GO:0031252 cell leading edge; GO:0043229 intracellular organelle; GO:0016020 membrane; GO:0044421 extracellular region part; GO:0042995 cell projection; GO:0043232 intracellular non-membrane-bounded organelle; GO:0071944 cell periphery; GO:0031982 vesicle; GO:0005737 cytoplasm; GO:0044424 intracellular part; GO:0005623 cell; GO:0005576 extracellular region; GO:0005886 plasma membrane; GO:0043228 …	GO:0043548 phosphatidylinositol 3-kinase binding; GO:0036312 phosphatidylinositol 3-kinase regulatory subunit binding; GO:0004725 protein tyrosine phosphatase activity; GO:0003824 catalytic activity; GO:0042578 phosphoric ester hydrolase activity; GO:0016791 phosphatase activity; GO:0005488 binding; GO:0016788 hydrolase activity, acting on ester bonds; GO:0005515 protein binding; GO:0016787 hydro…	K02374	PTPN13, FAP-1; tyrosine-protein phosphatase non-receptor type 13	hsa04210 Apoptosis - Homo sapiens (human);	IPR019748; IPR000387; IPR018980; IPR003595; IPR001478; IPR011019; IPR029021; IPR018979; IPR019749; IPR000242; IPR029071; IPR011993; IPR014352; IPR000299;	FERM central domain; Tyrosine specific protein phosphatases domain; FERM, C-terminal PH-like domain; Protein-tyrosine phosphatase, catalytic; PDZ domain; KIND domain; Protein-tyrosine phosphatase-like; FERM, N-terminal; Band 4.1 domain; PTP type protein phosphatase; Ubiquitin-related domain; PH domain-like; FERM/acyl-CoA-binding protein, 3-helical bundle; FERM domain;	T	KOG0792	Protein tyrosine phosphatase PTPMEG, contains FERM domain
Q08209	Serine/threonine-protein phosphatase 2B catalytic subunit alpha isoform OS=Homo sapiens OX=9606 GN=PPP3CA PE=1 SV=1	PPP3CA	58.687	19.4	0.969	0.62472	cytoplasm	GO:0044700 single organism signaling; GO:2000171 negative regulation of dendrite development; GO:0010612 regulation of cardiac muscle adaptation; GO:0010608 posttranscriptional regulation of gene expression; GO:0050796 regulation of insulin secretion; GO:0042593 glucose homeostasis; GO:0051532 regulation of NFAT protein import into nucleus; GO:0009891 positive regulation of biosynthetic process; …	GO:0016020 membrane; GO:0071944 cell periphery; GO:0030016 myofibril; GO:0005737 cytoplasm; GO:0032991 macromolecular complex; GO:0008287 protein serine/threonine phosphatase complex; GO:0099512 supramolecular fiber; GO:0044424 intracellular part; GO:0030018 Z disc; GO:0005623 cell; GO:0099080 supramolecular complex; GO:1903293 phosphatase complex; GO:0031674 I band; GO:0044422 organelle part; GO…	GO:0046982 protein heterodimerization activity; GO:0004722 protein serine/threonine phosphatase activity; GO:0016791 phosphatase activity; GO:0043167 ion binding; GO:0046983 protein dimerization activity; GO:0016787 hydrolase activity; GO:0005515 protein binding; GO:0008144 drug binding; GO:0004721 phosphoprotein phosphatase activity; GO:0005516 calmodulin binding; GO:0042578 phosphoric ester hyd…	K04348	PPP3C, CNA; serine/threonine-protein phosphatase 2B catalytic subunit [EC:3.1.3.16]	hsa04010 MAPK signaling pathway - Homo sapiens (human); hsa04020 Calcium signaling pathway - Homo sapiens (human); hsa04022 cGMP-PKG signaling pathway - Homo sapiens (human); hsa04114 Oocyte meiosis - Homo sapiens (human); hsa04218 Cellular senescence - Homo sapiens (human); hsa04310 Wnt signaling pathway - Homo sapiens (human); hsa04360 Axon guidance - Homo sapiens (human); hsa04370 VEGF signali…	IPR029052; IPR004843; IPR006186;	Metallo-dependent phosphatase-like; Calcineurin-like phosphoesterase domain, ApaH type; Serine/threonine-specific protein phosphatase/bis(5-nucleosyl)-tetraphosphatase;	R	KOG0375	Serine-threonine phosphatase 2B, catalytic subunit
Q9UNF1	Melanoma-associated antigen D2 OS=Homo sapiens OX=9606 GN=MAGED2 PE=1 SV=2	MAGED2	64.953	28.5	0.785	0.202	nucleus	GO:0000003 reproduction; GO:0070293 renal absorption; GO:0022414 reproductive process; GO:0030001 metal ion transport; GO:0002576 platelet degranulation; GO:0044699 single-organism process; GO:0051234 establishment of localization; GO:0007565 female pregnancy; GO:1902578 single-organism localization; GO:0006812 cation transport; GO:0003096 renal sodium ion transport; GO:0044706 multi-multicellula…	GO:0034774 secretory granule lumen; GO:0016020 membrane; GO:0031410 cytoplasmic vesicle; GO:0031982 vesicle; GO:0005737 cytoplasm; GO:0044433 cytoplasmic vesicle part; GO:0044424 intracellular part; GO:0005623 cell; GO:0044422 organelle part; GO:0043228 non-membrane-bounded organelle; GO:0031974 membrane-enclosed lumen; GO:0031983 vesicle lumen; GO:0070013 intracellular organelle lumen; GO:000562…	GO:0005515 protein binding; GO:0005488 binding;				IPR002190;	MAGE homology domain;	S	KOG4562	Uncharacterized conserved protein (tumor-rejection antigen MAGE in humans)
Q96CW6	Probable RNA polymerase II nuclear localization protein SLC7A6OS OS=Homo sapiens OX=9606 GN=SLC7A6OS PE=1 SV=2	SLC7A6OS	35.027	3.2	0.444		mitochondria	GO:0032502 developmental process; GO:0002244 hematopoietic progenitor cell differentiation; GO:0044707 single-multicellular organism process; GO:0048731 system development; GO:0048869 cellular developmental process; GO:0044763 single-organism cellular process; GO:0044699 single-organism process; GO:0071702 organic substance transport; GO:0002376 immune system process; GO:0002520 immune system dev…	GO:0043226 organelle; GO:0043231 intracellular membrane-bounded organelle; GO:0043229 intracellular organelle; GO:0005634 nucleus; GO:0044464 cell part; GO:0005622 intracellular; GO:0005737 cytoplasm; GO:0044424 intracellular part; GO:0043227 membrane-bounded organelle; GO:0005623 cell;							S	KOG4852	Uncharacterized conserved protein
O95573	Long-chain-fatty-acid--CoA ligase 3 OS=Homo sapiens OX=9606 GN=ACSL3 PE=1 SV=3	ACSL3	80.419	33.2	1.276	0.00041978	extracellular	GO:0060627 regulation of vesicle-mediated transport; GO:0044085 cellular component biogenesis; GO:0007420 brain development; GO:0035337 fatty-acyl-CoA metabolic process; GO:0009891 positive regulation of biosynthetic process; GO:0034379 very-low-density lipoprotein particle assembly; GO:0044255 cellular lipid metabolic process; GO:0019216 regulation of lipid metabolic process; GO:0044237 cellular…	GO:0016020 membrane; GO:0019867 outer membrane; GO:0042175 nuclear outer membrane-endoplasmic reticulum membrane network; GO:0005783 endoplasmic reticulum; GO:0031090 organelle membrane; GO:0005737 cytoplasm; GO:0031224 intrinsic component of membrane; GO:0044438 microbody part; GO:0044424 intracellular part; GO:0005623 cell; GO:0044422 organelle part; GO:0043228 non-membrane-bounded organelle; G…	GO:1901265 nucleoside phosphate binding; GO:0016874 ligase activity; GO:0019901 protein kinase binding; GO:0016877 ligase activity, forming carbon-sulfur bonds; GO:0005515 protein binding; GO:0097159 organic cyclic compound binding; GO:1901363 heterocyclic compound binding; GO:0032553 ribonucleotide binding; GO:0003824 catalytic activity; GO:0005488 binding; GO:0032550 purine ribonucleoside bindi…	K01897	ACSL, fadD; long-chain acyl-CoA synthetase [EC:6.2.1.3]	hsa00061 Fatty acid biosynthesis - Homo sapiens (human); hsa00071 Fatty acid degradation - Homo sapiens (human); hsa01100 Metabolic pathways - Homo sapiens (human); hsa01212 Fatty acid metabolism - Homo sapiens (human); hsa03320 PPAR signaling pathway - Homo sapiens (human); hsa04146 Peroxisome - Homo sapiens (human); hsa04216 Ferroptosis - Homo sapiens (human); hsa04714 Thermogenesis - Homo sapi…	IPR000873;	AMP-dependent synthetase/ligase;	I	KOG1256	Long-chain acyl-CoA synthetases (AMP-forming)
O75367	Core histone macro-H2A.1 OS=Homo sapiens OX=9606 GN=H2AFY PE=1 SV=4	H2AFY	39.617	17.5	1.121	0.154462	mitochondria	GO:0044085 cellular component biogenesis; GO:0034093 positive regulation of maintenance of sister chromatid cohesion; GO:0030858 positive regulation of epithelial cell differentiation; GO:0019216 regulation of lipid metabolic process; GO:0010564 regulation of cell cycle process; GO:0033127 regulation of histone phosphorylation; GO:0071900 regulation of protein serine/threonine kinase activity; GO…	GO:0001740 Barr body; GO:0044421 extracellular region part; GO:0000784 nuclear chromosome, telomeric region; GO:0000781 chromosome, telomeric region; GO:0031982 vesicle; GO:0000803 sex chromosome; GO:0032991 macromolecular complex; GO:0044424 intracellular part; GO:0005623 cell; GO:0000792 heterochromatin; GO:0044422 organelle part; GO:0044427 chromosomal part; GO:0043228 non-membrane-bounded org…	GO:0030291 protein serine/threonine kinase inhibitor activity; GO:0000182 rDNA binding; GO:0031490 chromatin DNA binding; GO:0003690 double-stranded DNA binding; GO:0046983 protein dimerization activity; GO:0019901 protein kinase binding; GO:0005515 protein binding; GO:0004860 protein kinase inhibitor activity; GO:0003682 chromatin binding; GO:0019207 kinase regulator activity; GO:0004857 enzyme …	K11251	H2A; histone H2A	hsa04217 Necroptosis - Homo sapiens (human); hsa05034 Alcoholism - Homo sapiens (human); hsa05322 Systemic lupus erythematosus - Homo sapiens (human);	IPR002589; IPR009072; IPR032454; IPR007125;	Macro domain; Histone-fold; Histone H2A, C-terminal domain; Histone H2A/H2B/H3;	BK	KOG2633	Hismacro and SEC14 domain-containing proteins
P85037	Forkhead box protein K1 OS=Homo sapiens OX=9606 GN=FOXK1 PE=1 SV=1	FOXK1	75.456	6.1	3.147	5.6655e-05	nucleus	GO:0070646 protein modification by small protein removal; GO:0097659 nucleic acid-templated transcription; GO:0048869 cellular developmental process; GO:0009891 positive regulation of biosynthetic process; GO:0044699 single-organism process; GO:0009058 biosynthetic process; GO:0044237 cellular metabolic process; GO:0051253 negative regulation of RNA metabolic process; GO:2001141 regulation of RNA…	GO:0043229 intracellular organelle; GO:0044446 intracellular organelle part; GO:0031981 nuclear lumen; GO:0044424 intracellular part; GO:0005623 cell; GO:0044422 organelle part; GO:0043226 organelle; GO:0043231 intracellular membrane-bounded organelle; GO:0031974 membrane-enclosed lumen; GO:0005654 nucleoplasm; GO:0005634 nucleus; GO:0070013 intracellular organelle lumen; GO:0044464 cell part; GO…	GO:0000981 RNA polymerase II transcription factor activity, sequence-specific DNA binding; GO:0003677 DNA binding; GO:0000976 transcription regulatory region sequence-specific DNA binding; GO:0003690 double-stranded DNA binding; GO:1990837 sequence-specific double-stranded DNA binding; GO:0001012 RNA polymerase II regulatory region DNA binding; GO:0005515 protein binding; GO:0043565 sequence-spec…	K09404	FOXK; forkhead box protein K		IPR011991; IPR008984; IPR001766; IPR000253;	Winged helix-turn-helix DNA-binding domain; SMAD/FHA domain; Fork head domain; Forkhead-associated (FHA) domain;	K	KOG2294	Transcription factor of the Forkhead/HNF3 family
Q5T013	Putative hydroxypyruvate isomerase OS=Homo sapiens OX=9606 GN=HYI PE=1 SV=2	HYI	30.405	15.9	3.294	0.00026107	mitochondria			GO:0016853 isomerase activity; GO:0003824 catalytic activity; GO:0005488 binding; GO:0005515 protein binding; GO:0016860 intramolecular oxidoreductase activity; GO:0016861 intramolecular oxidoreductase activity, interconverting aldoses and ketoses; GO:0008903 hydroxypyruvate isomerase activity;	K01816	hyi, gip; hydroxypyruvate isomerase [EC:5.3.1.22]	hsa00630 Glyoxylate and dicarboxylate metabolism - Homo sapiens (human); hsa01100 Metabolic pathways - Homo sapiens (human);	IPR013022;	Xylose isomerase-like, TIM barrel domain;	G	KOG4518	Hydroxypyruvate isomerase
O43824	Putative GTP-binding protein 6 OS=Homo sapiens OX=9606 GN=GTPBP6 PE=2 SV=4	GTPBP6	56.897	5	21.207	1.8513e-06	mitochondria		GO:0044424 intracellular part; GO:0005623 cell; GO:0044464 cell part; GO:0005622 intracellular; GO:0005737 cytoplasm;	GO:1901265 nucleoside phosphate binding; GO:0001882 nucleoside binding; GO:0043167 ion binding; GO:0044877 macromolecular complex binding; GO:0000166 nucleotide binding; GO:0043022 ribosome binding; GO:1901363 heterocyclic compound binding; GO:0097159 organic cyclic compound binding; GO:0032549 ribonucleoside binding; GO:0097367 carbohydrate derivative binding; GO:0032553 ribonucleotide binding; …				IPR030394; IPR006073; IPR025121; IPR027417; IPR032305;	HflX-type guanine nucleotide-binding (G) domain; GTP binding domain; GTPase HflX, N-terminal; P-loop containing nucleoside triphosphate hydrolase; GTP-binding protein, middle domain;	R	KOG0410	Predicted GTP binding protein
P52732	Kinesin-like protein KIF11 OS=Homo sapiens OX=9606 GN=KIF11 PE=1 SV=2	KIF11	119.16	0.9			nucleus	GO:0050794 regulation of cellular process; GO:0044085 cellular component biogenesis; GO:0016043 cellular component organization; GO:0007346 regulation of mitotic cell cycle; GO:0007098 centrosome cycle; GO:0048285 organelle fission; GO:0007067 mitotic nuclear division; GO:0051297 centrosome organization; GO:0048193 Golgi vesicle transport; GO:0007051 spindle organization; GO:0044699 single-organi…	GO:0043229 intracellular organelle; GO:0016020 membrane; GO:0099513 polymeric cytoskeletal fiber; GO:0000922 spindle pole; GO:0005874 microtubule; GO:0043232 intracellular non-membrane-bounded organelle; GO:0044430 cytoskeletal part; GO:0005737 cytoplasm; GO:0044446 intracellular organelle part; GO:0032991 macromolecular complex; GO:0099512 supramolecular fiber; GO:0044424 intracellular part; GO:…	GO:0003774 motor activity; GO:1901265 nucleoside phosphate binding; GO:0019901 protein kinase binding; GO:0016817 hydrolase activity, acting on acid anhydrides; GO:0016787 hydrolase activity; GO:0005515 protein binding; GO:0016887 ATPase activity; GO:0097159 organic cyclic compound binding; GO:1901363 heterocyclic compound binding; GO:0008092 cytoskeletal protein binding; GO:0016462 pyrophosphata…	K10398	KIF11, EG5; kinesin family member 11		IPR025901; IPR027417; IPR001752;	Kinesin-associated microtubule-binding domain; P-loop containing nucleoside triphosphate hydrolase; Kinesin motor domain;	Z	KOG0243	Kinesin-like protein
P51610	Host cell factor 1 OS=Homo sapiens OX=9606 GN=HCFC1 PE=1 SV=2	HCFC1	208.73	6.1	0.91	0.182441	nucleus	GO:0065008 regulation of biological quality; GO:0097659 nucleic acid-templated transcription; GO:0009891 positive regulation of biosynthetic process; GO:0044237 cellular metabolic process; GO:0008152 metabolic process; GO:0043981 histone H4-K5 acetylation; GO:0010558 negative regulation of macromolecule biosynthetic process; GO:0043170 macromolecule metabolic process; GO:0019538 protein metabolic…	GO:0016020 membrane; GO:0030425 dendrite; GO:0005737 cytoplasm; GO:0043025 neuronal cell body; GO:0032991 macromolecular complex; GO:0044424 intracellular part; GO:0005623 cell; GO:0000123 histone acetyltransferase complex; GO:0044422 organelle part; GO:0031974 membrane-enclosed lumen; GO:1902494 catalytic complex; GO:0005654 nucleoplasm; GO:0031248 protein acetyltransferase complex; GO:0070013 i…	GO:0000981 RNA polymerase II transcription factor activity, sequence-specific DNA binding; GO:0001228 transcriptional activator activity, RNA polymerase II transcription regulatory region sequence-specific binding; GO:0050839 cell adhesion molecule binding; GO:0001205 transcriptional activator activity, RNA polymerase II distal enhancer sequence-specific binding; GO:0042802 identical protein bind…	K14966	HCFC; host cell factor	hsa05168 Herpes simplex virus 1 infection - Homo sapiens (human);	IPR015916; IPR013783; IPR003961; IPR015915;	Galactose oxidase, beta-propeller; Immunoglobulin-like fold; Fibronectin type III; Kelch-type beta propeller;	DK	KOG4152	Host cell transcription factor HCFC1
O75369	Filamin-B OS=Homo sapiens OX=9606 GN=FLNB PE=1 SV=2	FLNB	278.16	39	0.917	0.0050765	cytoplasm,nucleus	GO:0044700 single organism signaling; GO:0065008 regulation of biological quality; GO:0048869 cellular developmental process; GO:0032989 cellular component morphogenesis; GO:0044699 single-organism process; GO:0009913 epidermal cell differentiation; GO:0007165 signal transduction; GO:0030036 actin cytoskeleton organization; GO:0007154 cell communication; GO:0008544 epidermis development; GO:00516…	GO:0016020 membrane; GO:0044421 extracellular region part; GO:0098862 cluster of actin-based cell projections; GO:0005903 brush border; GO:0005938 cell cortex; GO:0030054 cell junction; GO:0071944 cell periphery; GO:0030016 myofibril; GO:0031982 vesicle; GO:0005737 cytoplasm; GO:0099568 cytoplasmic region; GO:0031224 intrinsic component of membrane; GO:0099512 supramolecular fiber; GO:0044424 int…	GO:0097159 organic cyclic compound binding; GO:1901363 heterocyclic compound binding; GO:0050839 cell adhesion molecule binding; GO:0003723 RNA binding; GO:0008092 cytoskeletal protein binding; GO:0042802 identical protein binding; GO:0005488 binding; GO:0045296 cadherin binding; GO:0003676 nucleic acid binding; GO:0003779 actin binding; GO:0005515 protein binding;	K04437	FLNA; filamin	hsa04010 MAPK signaling pathway - Homo sapiens (human); hsa04510 Focal adhesion - Homo sapiens (human); hsa05132 Salmonella infection - Homo sapiens (human); hsa05205 Proteoglycans in cancer - Homo sapiens (human);	IPR013783; IPR014756; IPR001715;	Immunoglobulin-like fold; Immunoglobulin E-set; Calponin homology domain;	Z	KOG0518	Actin-binding cytoskeleton protein, filamin
Q96K49	Transmembrane protein 87B OS=Homo sapiens OX=9606 GN=TMEM87B PE=1 SV=1	TMEM87B	63.535	2.2			plasma membrane		GO:0031224 intrinsic component of membrane; GO:0016020 membrane; GO:0016021 integral component of membrane; GO:0044425 membrane part;							S	KOG2568	Predicted membrane protein
Q96IV0	Peptide-N(4)-(N-acetyl-beta-glucosaminyl)asparagine amidase OS=Homo sapiens OX=9606 GN=NGLY1 PE=1 SV=1	NGLY1	74.389	2.3	1.674	0.21914	cytoplasm,nucleus	GO:0051603 proteolysis involved in cellular protein catabolic process; GO:0044265 cellular macromolecule catabolic process; GO:0044257 cellular protein catabolic process; GO:0006516 glycoprotein catabolic process; GO:0006517 protein deglycosylation; GO:0044267 cellular protein metabolic process; GO:1901136 carbohydrate derivative catabolic process; GO:0009100 glycoprotein metabolic process; GO:00…	GO:0043226 organelle; GO:0043231 intracellular membrane-bounded organelle; GO:0043229 intracellular organelle; GO:0005634 nucleus; GO:0044464 cell part; GO:0005622 intracellular; GO:0005737 cytoplasm; GO:0044424 intracellular part; GO:0005829 cytosol; GO:0043227 membrane-bounded organelle; GO:0005623 cell; GO:0044444 cytoplasmic part;	GO:0003824 catalytic activity; GO:0005488 binding; GO:0043167 ion binding; GO:0043169 cation binding; GO:0046872 metal ion binding; GO:0016787 hydrolase activity; GO:0005515 protein binding; GO:0000224 peptide-N4-(N-acetyl-beta-glucosaminyl)asparagine amidase activity; GO:0016811 hydrolase activity, acting on carbon-nitrogen (but not peptide) bonds, in linear amides; GO:0016810 hydrolase activity…	K01456	E3.5.1.52, NGLY1, PNG1; peptide-N4-(N-acetyl-beta-glucosaminyl)asparagine amidase [EC:3.5.1.52]	hsa04141 Protein processing in endoplasmic reticulum - Homo sapiens (human);	IPR002931; IPR018997; IPR006588; IPR008979;	Transglutaminase-like; PUB domain; Peptide N glycanase, PAW domain; Galactose-binding domain-like;	O	KOG0909	Peptide:N-glycanase
P98095	Fibulin-2 OS=Homo sapiens OX=9606 GN=FBLN2 PE=1 SV=2	FBLN2	126.57	3.2			extracellular	GO:0050789 regulation of biological process; GO:0010810 regulation of cell-substrate adhesion; GO:0045785 positive regulation of cell adhesion; GO:0048518 positive regulation of biological process; GO:0010811 positive regulation of cell-substrate adhesion; GO:0030155 regulation of cell adhesion; GO:0065007 biological regulation;	GO:0031012 extracellular matrix; GO:0070062 extracellular exosome; GO:0043226 organelle; GO:0005615 extracellular space; GO:0044421 extracellular region part; GO:0031982 vesicle; GO:1903561 extracellular vesicle; GO:0005578 proteinaceous extracellular matrix; GO:0043227 membrane-bounded organelle; GO:0005576 extracellular region; GO:0043230 extracellular organelle;	GO:0005201 extracellular matrix structural constituent; GO:0005488 binding; GO:0043167 ion binding; GO:0046872 metal ion binding; GO:0043169 cation binding; GO:0005515 protein binding; GO:0005509 calcium ion binding; GO:0005198 structural molecule activity; GO:0050840 extracellular matrix binding;	K17307	FBLN1_2; fibulin 1/2		IPR026823; IPR001881; IPR000742; IPR009030; IPR000020;	Complement Clr-like EGF domain; EGF-like calcium-binding domain; EGF-like domain; Growth factor receptor cysteine-rich domain; Anaphylatoxin/fibulin;
P62256	Ubiquitin-conjugating enzyme E2 H OS=Homo sapiens OX=9606 GN=UBE2H PE=1 SV=1	UBE2H	20.655	31.1	1.545	0.00037992	cytoplasm	GO:0051603 proteolysis involved in cellular protein catabolic process; GO:0044257 cellular protein catabolic process; GO:0044267 cellular protein metabolic process; GO:0044237 cellular metabolic process; GO:0010498 proteasomal protein catabolic process; GO:0000209 protein polyubiquitination; GO:0071704 organic substance metabolic process; GO:0008152 metabolic process; GO:0070979 protein K11-linke…	GO:0044464 cell part; GO:0005622 intracellular; GO:0005737 cytoplasm; GO:0044424 intracellular part; GO:0005623 cell; GO:0005829 cytosol; GO:0044444 cytoplasmic part;	GO:1901265 nucleoside phosphate binding; GO:0031625 ubiquitin protein ligase binding; GO:0005515 protein binding; GO:0097159 organic cyclic compound binding; GO:1901363 heterocyclic compound binding; GO:0061630 ubiquitin protein ligase activity; GO:0032553 ribonucleotide binding; GO:0003824 catalytic activity; GO:0005488 binding; GO:0032550 purine ribonucleoside binding; GO:0043168 anion binding;…	K10576	UBE2H, UBC8; ubiquitin-conjugating enzyme E2 H [EC:2.3.2.23]	hsa04120 Ubiquitin mediated proteolysis - Homo sapiens (human);	IPR016135; IPR000608;	Ubiquitin-conjugating enzyme/RWD-like; Ubiquitin-conjugating enzyme E2;	O	KOG0416	Ubiquitin-protein ligase
O94855	Protein transport protein Sec24D OS=Homo sapiens OX=9606 GN=SEC24D PE=1 SV=2	SEC24D	113.01	25	1.378	0.060917	cytoplasm	GO:0044085 cellular component biogenesis; GO:0051640 organelle localization; GO:0044707 single-multicellular organism process; GO:0016043 cellular component organization; GO:0006901 vesicle coating; GO:0046907 intracellular transport; GO:0048207 vesicle targeting, rough ER to cis-Golgi; GO:0048208 COPII vesicle coating; GO:0043009 chordate embryonic development; GO:0044699 single-organism process…	GO:0030658 transport vesicle membrane; GO:0016020 membrane; GO:0042175 nuclear outer membrane-endoplasmic reticulum membrane network; GO:0005783 endoplasmic reticulum; GO:0031410 cytoplasmic vesicle; GO:0031090 organelle membrane; GO:0098796 membrane protein complex; GO:0031982 vesicle; GO:0005737 cytoplasm; GO:0044433 cytoplasmic vesicle part; GO:0032991 macromolecular complex; GO:0044424 intrac…	GO:0043169 cation binding; GO:0046872 metal ion binding; GO:0005515 protein binding; GO:0008270 zinc ion binding; GO:0046914 transition metal ion binding; GO:0005488 binding; GO:0043167 ion binding;	K14007	SEC24; protein transport protein SEC24	hsa04141 Protein processing in endoplasmic reticulum - Homo sapiens (human);	IPR006900; IPR012990; IPR006896; IPR006895; IPR029006; IPR002035; IPR007123;	Sec23/Sec24, helical domain; Sec23/Sec24 beta-sandwich; Sec23/Sec24, trunk domain; Zinc finger, Sec23/Sec24-type; ADF-H/Gelsolin-like domain; von Willebrand factor, type A; Gelsolin-like domain;	U	KOG1985	Vesicle coat complex COPII, subunit SEC24/subunit SFB2
P11021	Endoplasmic reticulum chaperone BiP OS=Homo sapiens OX=9606 GN=HSPA5 PE=1 SV=2	HSPA5	72.332	59	0.679	1.80116e-05	endoplasmic reticulum	GO:0044700 single organism signaling; GO:0010941 regulation of cell death; GO:0009891 positive regulation of biosynthetic process; GO:0046683 response to organophosphorus; GO:0032091 negative regulation of protein binding; GO:1905897 regulation of response to endoplasmic reticulum stress; GO:0044237 cellular metabolic process; GO:0009607 response to biotic stimulus; GO:0021762 substantia nigra de…	GO:0005790 smooth endoplasmic reticulum; GO:0016020 membrane; GO:0005783 endoplasmic reticulum; GO:0042175 nuclear outer membrane-endoplasmic reticulum membrane network; GO:0044421 extracellular region part; GO:0031410 cytoplasmic vesicle; GO:0071944 cell periphery; GO:0030054 cell junction; GO:0031982 vesicle; GO:0005737 cytoplasm; GO:0032991 macromolecular complex; GO:0031224 intrinsic componen…	GO:1901265 nucleoside phosphate binding; GO:0031625 ubiquitin protein ligase binding; GO:0016817 hydrolase activity, acting on acid anhydrides; GO:0016787 hydrolase activity; GO:0005515 protein binding; GO:0016887 ATPase activity; GO:0097159 organic cyclic compound binding; GO:1901363 heterocyclic compound binding; GO:0016462 pyrophosphatase activity; GO:0003824 catalytic activity; GO:0032553 rib…	K09490	HSPA5, BIP; heat shock 70kDa protein 5	hsa03060 Protein export - Homo sapiens (human); hsa04141 Protein processing in endoplasmic reticulum - Homo sapiens (human); hsa04612 Antigen processing and presentation - Homo sapiens (human); hsa04918 Thyroid hormone synthesis - Homo sapiens (human); hsa05020 Prion diseases - Homo sapiens (human);	IPR029048; IPR029047;	Heat shock protein 70kD, C-terminal domain; Heat shock protein 70kD, peptide-binding domain;	O	KOG0101	Molecular chaperones HSP70/HSC70, HSP70 superfamily
Q96CP2	FLYWCH family member 2 OS=Homo sapiens OX=9606 GN=FLYWCH2 PE=1 SV=1	FLYWCH2	14.563	32.1	1.254	0.090864	nucleus			GO:0097159 organic cyclic compound binding; GO:1901363 heterocyclic compound binding; GO:0003723 RNA binding; GO:0005488 binding; GO:0003676 nucleic acid binding;				IPR029279;	FLYWCH-type zinc finger-containing protein, N-terminal;
Q96AC1	Fermitin family homolog 2 OS=Homo sapiens OX=9606 GN=FERMT2 PE=1 SV=1	FERMT2	77.86	38.2	0.934	0.51476	nucleus	GO:0044700 single organism signaling; GO:0044085 cellular component biogenesis; GO:0065008 regulation of biological quality; GO:0007166 cell surface receptor signaling pathway; GO:0048869 cellular developmental process; GO:0045216 cell-cell junction organization; GO:0071560 cellular response to transforming growth factor beta stimulus; GO:0032989 cellular component morphogenesis; GO:0044699 singl…	GO:0016020 membrane; GO:0019898 extrinsic component of membrane; GO:0005737 cytoplasm; GO:0099568 cytoplasmic region; GO:0032991 macromolecular complex; GO:0099080 supramolecular complex; GO:0005623 cell; GO:0031674 I band; GO:0009898 cytoplasmic side of plasma membrane; GO:0044422 organelle part; GO:0043228 non-membrane-bounded organelle; GO:0005654 nucleoplasm; GO:0098590 plasma membrane region…	GO:1901981 phosphatidylinositol phosphate binding; GO:0005488 binding; GO:0005543 phospholipid binding; GO:0035091 phosphatidylinositol binding; GO:0043167 ion binding; GO:0008289 lipid binding; GO:0005547 phosphatidylinositol-3,4,5-trisphosphate binding; GO:0043168 anion binding; GO:0005515 protein binding;	K17083	FERMT2, KIND2; kindlin 2		IPR019748; IPR019749; IPR011993; IPR014352; IPR001849;	FERM central domain; Band 4.1 domain; PH domain-like; FERM/acyl-CoA-binding protein, 3-helical bundle; Pleckstrin homology domain;	D	KOG3727	Mitogen inducible gene product (contains ERM and PH domains)
P16219	Short-chain specific acyl-CoA dehydrogenase, mitochondrial OS=Homo sapiens OX=9606 GN=ACADS PE=1 SV=1	ACADS	44.297	2.9	0.921		mitochondria	GO:0034440 lipid oxidation; GO:0044699 single-organism process; GO:0044255 cellular lipid metabolic process; GO:0044237 cellular metabolic process; GO:0071704 organic substance metabolic process; GO:0008152 metabolic process; GO:0030258 lipid modification; GO:0044248 cellular catabolic process; GO:0032787 monocarboxylic acid metabolic process; GO:0009987 cellular process; GO:0006629 lipid metabol…	GO:0005759 mitochondrial matrix; GO:0043229 intracellular organelle; GO:0044429 mitochondrial part; GO:0005737 cytoplasm; GO:0044446 intracellular organelle part; GO:0031981 nuclear lumen; GO:0044424 intracellular part; GO:0005623 cell; GO:0005739 mitochondrion; GO:0044422 organelle part; GO:0031974 membrane-enclosed lumen; GO:0043226 organelle; GO:0043231 intracellular membrane-bounded organelle…	GO:1901265 nucleoside phosphate binding; GO:0050660 flavin adenine dinucleotide binding; GO:0043167 ion binding; GO:0000166 nucleotide binding; GO:0048037 cofactor binding; GO:0016491 oxidoreductase activity; GO:0016627 oxidoreductase activity, acting on the CH-CH group of donors; GO:1901363 heterocyclic compound binding; GO:0097159 organic cyclic compound binding; GO:0052890 oxidoreductase activ…	K00248	ACADS, bcd; butyryl-CoA dehydrogenase [EC:1.3.8.1]	hsa00071 Fatty acid degradation - Homo sapiens (human); hsa00280 Valine, leucine and isoleucine degradation - Homo sapiens (human); hsa00650 Butanoate metabolism - Homo sapiens (human); hsa01100 Metabolic pathways - Homo sapiens (human); hsa01200 Carbon metabolism - Homo sapiens (human); hsa01212 Fatty acid metabolism - Homo sapiens (human);	IPR013786; IPR009100; IPR006091; IPR009075;	Acyl-CoA dehydrogenase/oxidase, N-terminal; Acyl-CoA dehydrogenase/oxidase, N-terminal and middle domain; Acyl-CoA oxidase/dehydrogenase, central domain; Acyl-CoA dehydrogenase/oxidase C-terminal;	I	KOG0139	Short-chain acyl-CoA dehydrogenase
P01130	Low-density lipoprotein receptor OS=Homo sapiens OX=9606 GN=LDLR PE=1 SV=1	LDLR	95.375	3	1.229	0.14452	peroxisome	GO:0044409 entry into host; GO:0065008 regulation of biological quality; GO:0007586 digestion; GO:0006066 alcohol metabolic process; GO:0009891 positive regulation of biosynthetic process; GO:0031347 regulation of defense response; GO:0019216 regulation of lipid metabolic process; GO:0042157 lipoprotein metabolic process; GO:0098856 intestinal lipid absorption; GO:0055098 response to low-density …	GO:0016020 membrane; GO:0044421 extracellular region part; GO:0009897 external side of plasma membrane; GO:0031090 organelle membrane; GO:0045334 clathrin-coated endocytic vesicle; GO:0034362 low-density lipoprotein particle; GO:0005737 cytoplasm; GO:0044433 cytoplasmic vesicle part; GO:0032991 macromolecular complex; GO:0036019 endolysosome; GO:0005887 integral component of plasma membrane; GO:0…	GO:0043167 ion binding; GO:0044877 macromolecular complex binding; GO:0038024 cargo receptor activity; GO:0071813 lipoprotein particle binding; GO:0005515 protein binding; GO:0001618 virus receptor activity; GO:0002020 protease binding; GO:0030228 lipoprotein particle receptor activity; GO:0097367 carbohydrate derivative binding; GO:0030276 clathrin binding; GO:0060089 molecular transducer activi…	K12473	LDLR; low-density lipoprotein receptor	hsa04144 Endocytosis - Homo sapiens (human); hsa04913 Ovarian steroidogenesis - Homo sapiens (human); hsa04925 Aldosterone synthesis and secretion - Homo sapiens (human); hsa04927 Cortisol synthesis and secretion - Homo sapiens (human); hsa04934 Cushing syndrome - Homo sapiens (human); hsa04976 Bile secretion - Homo sapiens (human); hsa04979 Cholesterol metabolism - Homo sapiens (human); hsa05145…	IPR001881; IPR000742; IPR011042; IPR009030;	EGF-like calcium-binding domain; EGF-like domain; Six-bladed beta-propeller, TolB-like; Growth factor receptor cysteine-rich domain;
Q92598	Heat shock protein 105 kDa OS=Homo sapiens OX=9606 GN=HSPH1 PE=1 SV=1	HSPH1	96.864	44.9	0.861	0.043217	cytoplasm	GO:0002694 regulation of leukocyte activation; GO:0032872 regulation of stress-activated MAPK cascade; GO:0010941 regulation of cell death; GO:0032270 positive regulation of cellular protein metabolic process; GO:0009891 positive regulation of biosynthetic process; GO:1901298 regulation of hydrogen peroxide-mediated programmed cell death; GO:0006458 'de novo' protein folding; GO:0035966 response …	GO:0044421 extracellular region part; GO:0005874 microtubule; GO:0031410 cytoplasmic vesicle; GO:0031982 vesicle; GO:0005737 cytoplasm; GO:0044433 cytoplasmic vesicle part; GO:0099512 supramolecular fiber; GO:0044424 intracellular part; GO:0005623 cell; GO:0099080 supramolecular complex; GO:0044422 organelle part; GO:0043228 non-membrane-bounded organelle; GO:0031974 membrane-enclosed lumen; GO:0…	GO:0005524 ATP binding; GO:1901265 nucleoside phosphate binding; GO:0060589 nucleoside-triphosphatase regulator activity; GO:0001882 nucleoside binding; GO:0043167 ion binding; GO:0015631 tubulin binding; GO:0005515 protein binding; GO:0043014 alpha-tubulin binding; GO:0000166 nucleotide binding; GO:0098772 molecular function regulator; GO:0097159 organic cyclic compound binding; GO:1901363 heter…	K09485	HSP110; heat shock protein 110kDa	hsa04141 Protein processing in endoplasmic reticulum - Homo sapiens (human);	IPR029048; IPR029047;	Heat shock protein 70kD, C-terminal domain; Heat shock protein 70kD, peptide-binding domain;	O	KOG0103	Molecular chaperones HSP105/HSP110/SSE1, HSP70 superfamily
P60981	Destrin OS=Homo sapiens OX=9606 GN=DSTN PE=1 SV=3	DSTN	18.506	41.8	0.746	0.0095612	mitochondria	GO:0050794 regulation of cellular process; GO:0016043 cellular component organization; GO:0065008 regulation of biological quality; GO:0032956 regulation of actin cytoskeleton organization; GO:0043243 positive regulation of protein complex disassembly; GO:0007015 actin filament organization; GO:0044699 single-organism process; GO:0030832 regulation of actin filament length; GO:0043241 protein com…	GO:0043229 intracellular organelle; GO:0044421 extracellular region part; GO:0005938 cell cortex; GO:0043232 intracellular non-membrane-bounded organelle; GO:0071944 cell periphery; GO:0044430 cytoskeletal part; GO:0099568 cytoplasmic region; GO:0044446 intracellular organelle part; GO:0005737 cytoplasm; GO:0031982 vesicle; GO:0030863 cortical cytoskeleton; GO:0030864 cortical actin cytoskeleton;…	GO:0051015 actin filament binding; GO:0008092 cytoskeletal protein binding; GO:0005488 binding; GO:0044877 macromolecular complex binding; GO:0003779 actin binding; GO:0005515 protein binding; GO:0032403 protein complex binding;	K10363	DSTN; destrin (actin-depolymerizing factor)		IPR029006; IPR002108;	ADF-H/Gelsolin-like domain; Actin-depolymerising factor homology domain;	Z	KOG1735	Actin depolymerizing factor
Q86X76	Deaminated glutathione amidase OS=Homo sapiens OX=9606 GN=NIT1 PE=1 SV=2	NIT1	35.896	17.4	1.252	0.146697	mitochondria	GO:0006807 nitrogen compound metabolic process; GO:0008152 metabolic process;	GO:0043229 intracellular organelle; GO:0044421 extracellular region part; GO:0005737 cytoplasm; GO:0031982 vesicle; GO:0044424 intracellular part; GO:0005623 cell; GO:0005576 extracellular region; GO:0005739 mitochondrion; GO:0043226 organelle; GO:0070062 extracellular exosome; GO:0043231 intracellular membrane-bounded organelle; GO:0005634 nucleus; GO:0005622 intracellular; GO:0044464 cell part;…	GO:0016815 hydrolase activity, acting on carbon-nitrogen (but not peptide) bonds, in nitriles; GO:0016787 hydrolase activity; GO:0003824 catalytic activity; GO:0000257 nitrilase activity; GO:0016810 hydrolase activity, acting on carbon-nitrogen (but not peptide) bonds;	K11206			IPR003010;	Carbon-nitrogen hydrolase;	E	KOG0807	Carbon-nitrogen hydrolase
P29536	Leiomodin-1 OS=Homo sapiens OX=9606 GN=LMOD1 PE=1 SV=3	LMOD1	67.029	12.2	0.761	0.00040305	nucleus	GO:0050794 regulation of cellular process; GO:0030833 regulation of actin filament polymerization; GO:0016043 cellular component organization; GO:0003012 muscle system process; GO:0065008 regulation of biological quality; GO:0032273 positive regulation of protein polymerization; GO:0051694 pointed-end actin filament capping; GO:0030835 negative regulation of actin filament depolymerization; GO:00…	GO:0043229 intracellular organelle; GO:0016020 membrane; GO:0099513 polymeric cytoskeletal fiber; GO:0043232 intracellular non-membrane-bounded organelle; GO:0044430 cytoskeletal part; GO:0030016 myofibril; GO:0044446 intracellular organelle part; GO:0005737 cytoplasm; GO:0099512 supramolecular fiber; GO:0044424 intracellular part; GO:0005829 cytosol; GO:0099080 supramolecular complex; GO:0005623…	GO:0003779 actin binding; GO:0005523 tropomyosin binding; GO:0005515 protein binding; GO:0008092 cytoskeletal protein binding; GO:0005488 binding;	K22030	LMOD; leiomodin		IPR003124; IPR032675;	WH2 domain; Leucine-rich repeat domain, L domain-like;	Z	KOG3735	Tropomodulin and leiomodulin
Q9NZJ7	Mitochondrial carrier homolog 1 OS=Homo sapiens OX=9606 GN=MTCH1 PE=1 SV=1	MTCH1	41.544	9.5	1.195	0.153399	plasma membrane	GO:0021700 developmental maturation; GO:0010941 regulation of cell death; GO:0032270 positive regulation of cellular protein metabolic process; GO:0023051 regulation of signaling; GO:0048869 cellular developmental process; GO:0048666 neuron development; GO:0022008 neurogenesis; GO:0044699 single-organism process; GO:0045161 neuronal ion channel clustering; GO:0051234 establishment of localization…	GO:0043229 intracellular organelle; GO:0016020 membrane; GO:0044429 mitochondrial part; GO:0031090 organelle membrane; GO:0031967 organelle envelope; GO:0044446 intracellular organelle part; GO:0005737 cytoplasm; GO:0031224 intrinsic component of membrane; GO:0044424 intracellular part; GO:0005623 cell; GO:0016021 integral component of membrane; GO:0044422 organelle part; GO:0005739 mitochondrion…	GO:0005515 protein binding; GO:0005488 binding;	K17885	MTCH; mitochondrial carrier		IPR023395;	Mitochondrial carrier domain;	R	KOG2745	Mitochondrial carrier protein
P46934	E3 ubiquitin-protein ligase NEDD4 OS=Homo sapiens OX=9606 GN=NEDD4 PE=1 SV=4	NEDD4	149.11	6.7	1.593	0.0026376	nucleus	GO:0044700 single organism signaling; GO:0006623 protein targeting to vacuole; GO:0044237 cellular metabolic process; GO:0042110 T cell activation; GO:0050847 progesterone receptor signaling pathway; GO:0008152 metabolic process; GO:0003151 outflow tract morphogenesis; GO:0030522 intracellular receptor signaling pathway; GO:0030518 intracellular steroid hormone receptor signaling pathway; GO:0051…	GO:0030425 dendrite; GO:0016020 membrane; GO:0044421 extracellular region part; GO:0005938 cell cortex; GO:0071944 cell periphery; GO:0031982 vesicle; GO:0005737 cytoplasm; GO:0099568 cytoplasmic region; GO:0032991 macromolecular complex; GO:0044424 intracellular part; GO:0005623 cell; GO:0044422 organelle part; GO:0043197 dendritic spine; GO:0044427 chromosomal part; GO:0043228 non-membrane-boun…	GO:0016597 amino acid binding; GO:0008200 ion channel inhibitor activity; GO:0050815 phosphoserine binding; GO:0005102 receptor binding; GO:0099106 ion channel regulator activity; GO:0031698 beta-2 adrenergic receptor binding; GO:0005515 protein binding; GO:0017080 sodium channel regulator activity; GO:0070063 RNA polymerase binding; GO:0098772 molecular function regulator; GO:0032182 ubiquitin-l…	K10591	NEDD4, RSP5; E3 ubiquitin-protein ligase NEDD4 [EC:2.3.2.26]	hsa04120 Ubiquitin mediated proteolysis - Homo sapiens (human); hsa04144 Endocytosis - Homo sapiens (human); hsa04530 Tight junction - Homo sapiens (human); hsa05169 Epstein-Barr virus infection - Homo sapiens (human);	IPR001202; IPR000569; IPR000008;	WW domain; HECT domain; C2 domain;	O	KOG0940	Ubiquitin protein ligase RSP5/NEDD4
P78362	SRSF protein kinase 2 OS=Homo sapiens OX=9606 GN=SRPK2 PE=1 SV=3	SRPK2	77.526	5.7	0.497	0.0095172	cytoplasm	GO:0044085 cellular component biogenesis; GO:0044700 single organism signaling; GO:0022613 ribonucleoprotein complex biogenesis; GO:0010941 regulation of cell death; GO:0022618 ribonucleoprotein complex assembly; GO:0043523 regulation of neuron apoptotic process; GO:0044237 cellular metabolic process; GO:0001525 angiogenesis; GO:0008152 metabolic process; GO:0065003 macromolecular complex assembl…	GO:0043229 intracellular organelle; GO:0043232 intracellular non-membrane-bounded organelle; GO:0044446 intracellular organelle part; GO:0005737 cytoplasm; GO:0031981 nuclear lumen; GO:0044424 intracellular part; GO:0005730 nucleolus; GO:0005829 cytosol; GO:0005623 cell; GO:0044422 organelle part; GO:0043228 non-membrane-bounded organelle; GO:0043226 organelle; GO:0043231 intracellular membrane-b…	GO:1901265 nucleoside phosphate binding; GO:0016773 phosphotransferase activity, alcohol group as acceptor; GO:0005515 protein binding; GO:0004672 protein kinase activity; GO:1901363 heterocyclic compound binding; GO:0097159 organic cyclic compound binding; GO:0016301 kinase activity; GO:0003824 catalytic activity; GO:0032553 ribonucleotide binding; GO:0005488 binding; GO:0032550 purine ribonucle…	K08831	SRPK2; serine/threonine-protein kinase SRPK2 [EC:2.7.11.1]		IPR000719; IPR011009;	Protein kinase domain; Protein kinase-like domain;	T	KOG1290	Serine/threonine protein kinase
Q9BYD2	39S ribosomal protein L9, mitochondrial OS=Homo sapiens OX=9606 GN=MRPL9 PE=1 SV=2	MRPL9	30.243	16.5	1.158	0.050062	nucleus	GO:0016043 cellular component organization; GO:0006518 peptide metabolic process; GO:0044267 cellular protein metabolic process; GO:0044699 single-organism process; GO:0009058 biosynthetic process; GO:1901566 organonitrogen compound biosynthetic process; GO:0044237 cellular metabolic process; GO:0043241 protein complex disassembly; GO:0071704 organic substance metabolic process; GO:0008152 metabo…	GO:0016020 membrane; GO:0031090 organelle membrane; GO:0005737 cytoplasm; GO:0032991 macromolecular complex; GO:0044424 intracellular part; GO:0005762 mitochondrial large ribosomal subunit; GO:0005623 cell; GO:0000313 organellar ribosome; GO:0044422 organelle part; GO:0043228 non-membrane-bounded organelle; GO:0005740 mitochondrial envelope; GO:0031974 membrane-enclosed lumen; GO:0070013 intracel…	GO:0097159 organic cyclic compound binding; GO:1901363 heterocyclic compound binding; GO:0003723 RNA binding; GO:0005488 binding; GO:0003676 nucleic acid binding; GO:0005515 protein binding; GO:0005198 structural molecule activity; GO:0003735 structural constituent of ribosome;	K02939	RP-L9, MRPL9, rplI; large subunit ribosomal protein L9	hsa03010 Ribosome - Homo sapiens (human);	IPR009027; IPR020070;	Ribosomal protein L9/RNase H1, N-terminal; Ribosomal protein L9, N-terminal;	J	KOG4607	Mitochondrial ribosomal protein L9
Q9BXF6	Rab11 family-interacting protein 5 OS=Homo sapiens OX=9606 GN=RAB11FIP5 PE=1 SV=1	RAB11FIP5	70.414	18.4	1.221	0.1428	nucleus	GO:0044700 single organism signaling; GO:0009914 hormone transport; GO:0071331 cellular response to hexose stimulus; GO:0065008 regulation of biological quality; GO:0009746 response to hexose; GO:0042593 glucose homeostasis; GO:0023051 regulation of signaling; GO:0071468 cellular response to acidic pH; GO:2000008 regulation of protein localization to cell surface; GO:0044699 single-organism proce…	GO:0030658 transport vesicle membrane; GO:0016020 membrane; GO:0019867 outer membrane; GO:0031090 organelle membrane; GO:0031410 cytoplasmic vesicle; GO:0031982 vesicle; GO:0005737 cytoplasm; GO:0044433 cytoplasmic vesicle part; GO:0055038 recycling endosome membrane; GO:0044424 intracellular part; GO:0005623 cell; GO:0044422 organelle part; GO:0005769 early endosome; GO:0055037 recycling endosom…	GO:0031267 small GTPase binding; GO:0008092 cytoskeletal protein binding; GO:0017016 Ras GTPase binding; GO:0005488 binding; GO:0015631 tubulin binding; GO:0043015 gamma-tubulin binding; GO:0005515 protein binding; GO:0051020 GTPase binding; GO:0017137 Rab GTPase binding; GO:0019899 enzyme binding;	K12484	RAB11FIP1_2_5; Rab11 family-interacting protein 1/2/5	hsa04144 Endocytosis - Homo sapiens (human);	IPR019018; IPR000008;	Rab-binding domain FIP-RBD; C2 domain;
Q96MT4	Uncharacterized protein encoded by LINC01600 OS=Homo sapiens OX=9606 GN=LINC01600 PE=1 SV=2	LINC01600	13.896	6.3	22.507	4.5582e-07	extracellular
Q96HD1	Cysteine-rich with EGF-like domain protein 1 OS=Homo sapiens OX=9606 GN=CRELD1 PE=1 SV=3	CRELD1	45.439	16.7	1.362	0.0176843	plasma membrane	GO:0003197 endocardial cushion development; GO:0032502 developmental process; GO:0072359 circulatory system development; GO:0044707 single-multicellular organism process; GO:0009888 tissue development; GO:0060485 mesenchyme development; GO:0003279 cardiac septum development; GO:0048731 system development; GO:0044699 single-organism process; GO:0032501 multicellular organismal process; GO:0003205 …	GO:0031224 intrinsic component of membrane; GO:0016020 membrane; GO:0016021 integral component of membrane; GO:0044425 membrane part;	GO:0043169 cation binding; GO:0046872 metal ion binding; GO:0005515 protein binding; GO:0005509 calcium ion binding; GO:0005488 binding; GO:0043167 ion binding;				IPR021852; IPR001881; IPR002049; IPR000742; IPR009030;	Domain of unknown function DUF3456; EGF-like calcium-binding domain; Laminin EGF domain; EGF-like domain; Growth factor receptor cysteine-rich domain;
Q96AB3	Isochorismatase domain-containing protein 2 OS=Homo sapiens OX=9606 GN=ISOC2 PE=1 SV=1	ISOC2	22.337	7.8			mitochondria	GO:0065008 regulation of biological quality; GO:0008152 metabolic process; GO:0031647 regulation of protein stability; GO:0031648 protein destabilization; GO:0065007 biological regulation;	GO:0043226 organelle; GO:0043231 intracellular membrane-bounded organelle; GO:0043229 intracellular organelle; GO:0005634 nucleus; GO:0044464 cell part; GO:0005622 intracellular; GO:0005737 cytoplasm; GO:0044424 intracellular part; GO:0043227 membrane-bounded organelle; GO:0005623 cell;	GO:0005515 protein binding; GO:0003824 catalytic activity; GO:0005488 binding;				IPR000868;	Isochorismatase-like;
Q8IYD1	Eukaryotic peptide chain release factor GTP-binding subunit ERF3B OS=Homo sapiens OX=9606 GN=GSPT2 PE=1 SV=2	GSPT2	68.882	14	2.073	0.000199228	cytoplasm,nucleus	GO:0006518 peptide metabolic process; GO:0044699 single-organism process; GO:0009058 biosynthetic process; GO:0044237 cellular metabolic process; GO:0043241 protein complex disassembly; GO:0008152 metabolic process; GO:0002181 cytoplasmic translation; GO:0000184 nuclear-transcribed mRNA catabolic process, nonsense-mediated decay; GO:1901361 organic cyclic compound catabolic process; GO:0019538 pr…	GO:0018444 translation release factor complex; GO:0044464 cell part; GO:0005622 intracellular; GO:0005737 cytoplasm; GO:0032991 macromolecular complex; GO:0044424 intracellular part; GO:0005829 cytosol; GO:0043234 protein complex; GO:0005623 cell; GO:0044444 cytoplasmic part;	GO:1901265 nucleoside phosphate binding; GO:0016817 hydrolase activity, acting on acid anhydrides; GO:0005515 protein binding; GO:0016787 hydrolase activity; GO:1901363 heterocyclic compound binding; GO:0097159 organic cyclic compound binding; GO:0016462 pyrophosphatase activity; GO:0032553 ribonucleotide binding; GO:0003824 catalytic activity; GO:0005488 binding; GO:0032550 purine ribonucleoside…	K03267	ERF3, GSPT; peptide chain release factor subunit 3	hsa03015 mRNA surveillance pathway - Homo sapiens (human);	IPR004160; IPR004161; IPR009001; IPR027417; IPR000795; IPR009818; IPR009000;	Translation elongation factor EFTu/EF1A, C-terminal; Translation elongation factor EFTu-like, domain 2; Translation elongation factor EF1A/initiation factor IF2gamma, C-terminal; P-loop containing nucleoside triphosphate hydrolase; Transcription factor, GTP-binding domain; Ataxin-2, C-terminal; Translation protein, beta-barrel domain;	J	KOG0459	Polypeptide release factor 3
O43504	Ragulator complex protein LAMTOR5 OS=Homo sapiens OX=9606 GN=LAMTOR5 PE=1 SV=1	LAMTOR5	9.6138	33	2.138	0.0171226	cytoskeleton	GO:0001101 response to acid chemical; GO:0065008 regulation of biological quality; GO:0019079 viral genome replication; GO:0010941 regulation of cell death; GO:0023051 regulation of signaling; GO:1902533 positive regulation of intracellular signal transduction; GO:0044699 single-organism process; GO:0044764 multi-organism cellular process; GO:0006914 autophagy; GO:0044237 cellular metabolic proce…	GO:0016020 membrane; GO:0031410 cytoplasmic vesicle; GO:0031090 organelle membrane; GO:0098796 membrane protein complex; GO:0098857 membrane microdomain; GO:0071986 Ragulator complex; GO:0005737 cytoplasm; GO:0031982 vesicle; GO:0044433 cytoplasmic vesicle part; GO:0032991 macromolecular complex; GO:0044424 intracellular part; GO:0005623 cell; GO:0044422 organelle part; GO:0005765 lysosomal membr…	GO:0005515 protein binding; GO:0005488 binding;	K16344	LAMTOR5, HBXIP; ragulator complex protein LAMTOR5	hsa04150 mTOR signaling pathway - Homo sapiens (human);
Q96LD1	Zeta-sarcoglycan OS=Homo sapiens OX=9606 GN=SGCZ PE=2 SV=1	SGCZ	32.948	2.7	0.286	0.00130271	plasma membrane	GO:0014706 striated muscle tissue development; GO:0072359 circulatory system development; GO:0055001 muscle cell development; GO:0016043 cellular component organization; GO:0044707 single-multicellular organism process; GO:0065008 regulation of biological quality; GO:0048738 cardiac muscle tissue development; GO:0048869 cellular developmental process; GO:0044699 single-organism process; GO:006024…	GO:0090665 glycoprotein complex; GO:0043229 intracellular organelle; GO:0016020 membrane; GO:0043232 intracellular non-membrane-bounded organelle; GO:0098796 membrane protein complex; GO:0071944 cell periphery; GO:0098797 plasma membrane protein complex; GO:0005737 cytoplasm; GO:0032991 macromolecular complex; GO:0031224 intrinsic component of membrane; GO:0044424 intracellular part; GO:0005623 c…							Z	KOG3950	Gamma/delta sarcoglycan
Q96DT5	Dynein heavy chain 11, axonemal OS=Homo sapiens OX=9606 GN=DNAH11 PE=1 SV=4	DNAH11	520.36	0.2	0.687	0.019556	cytoplasm	GO:0050794 regulation of cellular process; GO:0044707 single-multicellular organism process; GO:0051674 localization of cell; GO:0007389 pattern specification process; GO:0044699 single-organism process; GO:0003352 regulation of cilium movement; GO:0030317 flagellated sperm motility; GO:0009855 determination of bilateral symmetry; GO:0007368 determination of left/right symmetry; GO:0060632 regula…	GO:0043229 intracellular organelle; GO:0005929 cilium; GO:0099513 polymeric cytoskeletal fiber; GO:0042995 cell projection; GO:0005874 microtubule; GO:0043232 intracellular non-membrane-bounded organelle; GO:0044430 cytoskeletal part; GO:0005737 cytoplasm; GO:0044446 intracellular organelle part; GO:0032991 macromolecular complex; GO:0044424 intracellular part; GO:0099512 supramolecular fiber; GO…	GO:0005524 ATP binding; GO:0003774 motor activity; GO:1901265 nucleoside phosphate binding; GO:0001882 nucleoside binding; GO:0043167 ion binding; GO:0016817 hydrolase activity, acting on acid anhydrides; GO:0016787 hydrolase activity; GO:0000166 nucleotide binding; GO:0017111 nucleoside-triphosphatase activity; GO:0016887 ATPase activity; GO:0097159 organic cyclic compound binding; GO:1901363 he…	K10408	DNAH; dynein heavy chain, axonemal	hsa05016 Huntington disease - Homo sapiens (human);	IPR024317; IPR004273; IPR011704; IPR003593; IPR013602; IPR024743; IPR027417; IPR013594;	Dynein heavy chain, P-loop containing D4 domain; Dynein heavy chain domain; ATPase, dynein-related, AAA domain; AAA+ ATPase domain; Dynein heavy chain, domain-2; Dynein heavy chain, coiled coil stalk; P-loop containing nucleoside triphosphate hydrolase; Dynein heavy chain, domain-1;	Z	KOG3595	Dyneins, heavy chain
Q04837	Single-stranded DNA-binding protein, mitochondrial OS=Homo sapiens OX=9606 GN=SSBP1 PE=1 SV=1	SSBP1	17.259	33.8	1.309	0.0057234	nucleus	GO:0016043 cellular component organization; GO:0006260 DNA replication; GO:0006725 cellular aromatic compound metabolic process; GO:0006259 DNA metabolic process; GO:0048869 cellular developmental process; GO:0032989 cellular component morphogenesis; GO:0044699 single-organism process; GO:0009058 biosynthetic process; GO:0070584 mitochondrion morphogenesis; GO:0044237 cellular metabolic process; …	GO:0005759 mitochondrial matrix; GO:0043229 intracellular organelle; GO:0044421 extracellular region part; GO:0042645 mitochondrial nucleoid; GO:0044429 mitochondrial part; GO:0043232 intracellular non-membrane-bounded organelle; GO:0005737 cytoplasm; GO:0044446 intracellular organelle part; GO:0031982 vesicle; GO:0044424 intracellular part; GO:0005623 cell; GO:0005576 extracellular region; GO:00…	GO:0097159 organic cyclic compound binding; GO:1901363 heterocyclic compound binding; GO:0003677 DNA binding; GO:0003723 RNA binding; GO:0005488 binding; GO:0003676 nucleic acid binding; GO:0003697 single-stranded DNA binding; GO:0005515 protein binding; GO:0003682 chromatin binding;	K03111	ssb; single-strand DNA-binding protein	hsa03030 DNA replication - Homo sapiens (human); hsa03430 Mismatch repair - Homo sapiens (human); hsa03440 Homologous recombination - Homo sapiens (human);	IPR012340;	Nucleic acid-binding, OB-fold;	L	KOG1653	Single-stranded DNA-binding protein
O43493	Trans-Golgi network integral membrane protein 2 OS=Homo sapiens OX=9606 GN=TGOLN2 PE=1 SV=3	TGOLN2	51.018	14.2	0.702	0.056604	extracellular	GO:0016043 cellular component organization; GO:0046907 intracellular transport; GO:0006895 Golgi to endosome transport; GO:0016192 vesicle-mediated transport; GO:0048193 Golgi vesicle transport; GO:0051234 establishment of localization; GO:0051641 cellular localization; GO:0016197 endosomal transport; GO:0006810 transport; GO:0051649 establishment of localization in cell; GO:0061024 membrane orga…	GO:0016020 membrane; GO:0031090 organelle membrane; GO:0031410 cytoplasmic vesicle; GO:0071944 cell periphery; GO:0005737 cytoplasm; GO:0031982 vesicle; GO:0044433 cytoplasmic vesicle part; GO:0031224 intrinsic component of membrane; GO:0044424 intracellular part; GO:0005623 cell; GO:0030662 coated vesicle membrane; GO:0044422 organelle part; GO:0031974 membrane-enclosed lumen; GO:0005654 nucleop…	GO:0005515 protein binding; GO:0005488 binding;
O60229	Kalirin OS=Homo sapiens OX=9606 GN=KALRN PE=1 SV=2	KALRN	340.17	0.6	2.433	0.011678	cytoplasm	GO:0044700 single organism signaling; GO:1900271 regulation of long-term synaptic potentiation; GO:0065008 regulation of biological quality; GO:0010941 regulation of cell death; GO:0048732 gland development; GO:0022414 reproductive process; GO:0007166 cell surface receptor signaling pathway; GO:0046959 habituation; GO:0007635 chemosensory behavior; GO:0044237 cellular metabolic process; GO:005087…	GO:0044421 extracellular region part; GO:0031982 vesicle; GO:0005737 cytoplasm; GO:0044424 intracellular part; GO:0005623 cell; GO:0032279 asymmetric synapse; GO:0044422 organelle part; GO:0043228 non-membrane-bounded organelle; GO:0031974 membrane-enclosed lumen; GO:0070062 extracellular exosome; GO:0005856 cytoskeleton; GO:0005654 nucleoplasm; GO:0070013 intracellular organelle lumen; GO:000562…	GO:1901265 nucleoside phosphate binding; GO:0016773 phosphotransferase activity, alcohol group as acceptor; GO:0005085 guanyl-nucleotide exchange factor activity; GO:0060589 nucleoside-triphosphatase regulator activity; GO:0030695 GTPase regulator activity; GO:0005515 protein binding; GO:0004672 protein kinase activity; GO:0098772 molecular function regulator; GO:1901363 heterocyclic compound bin…	K15048	KALRN; kalirin [EC:2.7.11.1]		IPR003598; IPR007110; IPR003599; IPR000219; IPR003961; IPR013098; IPR001849; IPR011009; IPR001251; IPR001452; IPR013783; IPR000719; IPR011993;	Immunoglobulin subtype 2; Immunoglobulin-like domain; Immunoglobulin subtype; Dbl homology (DH) domain; Fibronectin type III; Immunoglobulin I-set; Pleckstrin homology domain; Protein kinase-like domain; CRAL-TRIO lipid binding domain; SH3 domain; Immunoglobulin-like fold; Protein kinase domain; PH domain-like;
P01266	Thyroglobulin OS=Homo sapiens OX=9606 GN=TG PE=1 SV=5	TG	304.79	1.3	39.239	7.0985e-08	plasma membrane	GO:0050794 regulation of cellular process; GO:0044700 single organism signaling; GO:0042446 hormone biosynthetic process; GO:0044707 single-multicellular organism process; GO:0065008 regulation of biological quality; GO:0048732 gland development; GO:0031641 regulation of myelination; GO:0006725 cellular aromatic compound metabolic process; GO:1901615 organic hydroxy compound metabolic process; GO…	GO:0005576 extracellular region;	GO:0005515 protein binding; GO:0005102 receptor binding; GO:0005488 binding; GO:0005179 hormone activity;	K10809	TG; thyroglobulin	hsa04918 Thyroid hormone synthesis - Homo sapiens (human); hsa05320 Autoimmune thyroid disease - Homo sapiens (human);	IPR011641; IPR029058; IPR002018; IPR000716;	Tyrosine-protein kinase ephrin type A/B receptor-like; Alpha/Beta hydrolase fold; Carboxylesterase, type B; Thyroglobulin type-1;
A2A3N6	Putative PIP5K1A and PSMD4-like protein OS=Homo sapiens OX=9606 GN=PIPSL PE=5 SV=1	PIPSL	95.047	5.2			nucleus	GO:0016310 phosphorylation; GO:0046486 glycerolipid metabolic process; GO:0046854 phosphatidylinositol phosphorylation; GO:0044763 single-organism cellular process; GO:0044699 single-organism process; GO:0044255 cellular lipid metabolic process; GO:0044238 primary metabolic process; GO:0044237 cellular metabolic process; GO:0046834 lipid phosphorylation; GO:0006796 phosphate-containing compound m…	GO:0044424 intracellular part; GO:0005623 cell; GO:0044464 cell part; GO:0005622 intracellular; GO:0005737 cytoplasm;	GO:0016307 phosphatidylinositol phosphate kinase activity; GO:0016301 kinase activity; GO:0016773 phosphotransferase activity, alcohol group as acceptor; GO:0003824 catalytic activity; GO:0016740 transferase activity; GO:0016772 transferase activity, transferring phosphorus-containing groups;	K00889	PIP5K; 1-phosphatidylinositol-4-phosphate 5-kinase [EC:2.7.1.68]	hsa00562 Inositol phosphate metabolism - Homo sapiens (human); hsa01100 Metabolic pathways - Homo sapiens (human); hsa04070 Phosphatidylinositol signaling system - Homo sapiens (human); hsa04072 Phospholipase D signaling pathway - Homo sapiens (human); hsa04144 Endocytosis - Homo sapiens (human); hsa04666 Fc gamma R-mediated phagocytosis - Homo sapiens (human); hsa04810 Regulation of actin cytosk…	IPR027483; IPR002498; IPR027484; IPR002035;	Phosphatidylinositol-4-phosphate 5-kinase, C-terminal; Phosphatidylinositol-4-phosphate 5-kinase, core; Phosphatidylinositol-4-phosphate 5-kinase, N-terminal domain; von Willebrand factor, type A;
Q9NR09	Baculoviral IAP repeat-containing protein 6 OS=Homo sapiens OX=9606 GN=BIRC6 PE=1 SV=2	BIRC6	530.25	1.2	1.595	0.00187872	plasma membrane	GO:0010941 regulation of cell death; GO:0009968 negative regulation of signal transduction; GO:0022414 reproductive process; GO:0043009 chordate embryonic development; GO:0023051 regulation of signaling; GO:0007067 mitotic nuclear division; GO:0001892 embryonic placenta development; GO:0044699 single-organism process; GO:0044237 cellular metabolic process; GO:0010564 regulation of cell cycle proc…	GO:0016020 membrane; GO:0031410 cytoplasmic vesicle; GO:0031982 vesicle; GO:0005737 cytoplasm; GO:0044424 intracellular part; GO:0005623 cell; GO:0044422 organelle part; GO:0043228 non-membrane-bounded organelle; GO:0005856 cytoskeleton; GO:0005815 microtubule organizing center; GO:0015630 microtubule cytoskeleton; GO:0005622 intracellular; GO:0044464 cell part; GO:0098791 Golgi subcompartment; G…	GO:0019787 ubiquitin-like protein transferase activity; GO:0061631 ubiquitin conjugating enzyme activity; GO:0061134 peptidase regulator activity; GO:0005515 protein binding; GO:0004857 enzyme inhibitor activity; GO:0098772 molecular function regulator; GO:0004866 endopeptidase inhibitor activity; GO:0004869 cysteine-type endopeptidase inhibitor activity; GO:0030234 enzyme regulator activity; GO:…	K10586	BIRC6, BRUCE; baculoviral IAP repeat-containing protein 6 (apollon) [EC:2.3.2.23]	hsa04120 Ubiquitin mediated proteolysis - Homo sapiens (human); hsa04215 Apoptosis - multiple species - Homo sapiens (human);	IPR016135; IPR015943; IPR000608;	Ubiquitin-conjugating enzyme/RWD-like; WD40/YVTN repeat-like-containing domain; Ubiquitin-conjugating enzyme E2;	DR	KOG1101	Apoptosis inhibitor IAP1 and related BIR domain proteins
O15260	Surfeit locus protein 4 OS=Homo sapiens OX=9606 GN=SURF4 PE=1 SV=3	SURF4	30.394	14.9	0.531	0.002376	plasma membrane	GO:0050794 regulation of cellular process; GO:0016043 cellular component organization; GO:0010256 endomembrane system organization; GO:0045321 leukocyte activation; GO:0002283 neutrophil activation involved in immune response; GO:0002252 immune effector process; GO:0048193 Golgi vesicle transport; GO:0044699 single-organism process; GO:0050896 response to stimulus; GO:0051234 establishment of loc…	GO:0016020 membrane; GO:0042175 nuclear outer membrane-endoplasmic reticulum membrane network; GO:0005783 endoplasmic reticulum; GO:0031410 cytoplasmic vesicle; GO:0031090 organelle membrane; GO:0071944 cell periphery; GO:0031982 vesicle; GO:0005737 cytoplasm; GO:0044433 cytoplasmic vesicle part; GO:0031224 intrinsic component of membrane; GO:0044424 intracellular part; GO:0005623 cell; GO:004442…	GO:0005515 protein binding; GO:0005488 binding;	K20369	ERV29, SURF4; ER-derived vesicles protein				U	KOG3998	Putative cargo transport protein ERV29
Q96FZ7	Charged multivesicular body protein 6 OS=Homo sapiens OX=9606 GN=CHMP6 PE=1 SV=3	CHMP6	23.485	13.4	1.222	0.0066775	nucleus	GO:0044085 cellular component biogenesis; GO:0010256 endomembrane system organization; GO:0007067 mitotic nuclear division; GO:0044699 single-organism process; GO:0044764 multi-organism cellular process; GO:0006914 autophagy; GO:0044237 cellular metabolic process; GO:0015031 protein transport; GO:0051234 establishment of localization; GO:0008152 metabolic process; GO:0050000 chromosome localizati…	GO:0016020 membrane; GO:0044421 extracellular region part; GO:0031410 cytoplasmic vesicle; GO:0031090 organelle membrane; GO:0098796 membrane protein complex; GO:0005737 cytoplasm; GO:0031982 vesicle; GO:0044433 cytoplasmic vesicle part; GO:0032991 macromolecular complex; GO:0044424 intracellular part; GO:0005623 cell; GO:0044422 organelle part; GO:0070062 extracellular exosome; GO:0036452 ESCRT …	GO:0005515 protein binding; GO:0047485 protein N-terminus binding; GO:0005488 binding;	K12195	CHMP6, VPS20; charged multivesicular body protein 6	hsa04144 Endocytosis - Homo sapiens (human); hsa04217 Necroptosis - Homo sapiens (human);			R	KOG2910	Uncharacterized conserved protein predicted to be involved in protein sorting
Q9HCS7	Pre-mRNA-splicing factor SYF1 OS=Homo sapiens OX=9606 GN=XAB2 PE=1 SV=2	XAB2	100.01	3.5			cytoplasm	GO:0007420 brain development; GO:0043009 chordate embryonic development; GO:0097659 nucleic acid-templated transcription; GO:0006289 nucleotide-excision repair; GO:0044699 single-organism process; GO:0021987 cerebral cortex development; GO:0009058 biosynthetic process; GO:0044237 cellular metabolic process; GO:0021537 telencephalon development; GO:0008152 metabolic process; GO:0060322 head develo…	GO:0043229 intracellular organelle; GO:0016020 membrane; GO:0044446 intracellular organelle part; GO:0032991 macromolecular complex; GO:0031981 nuclear lumen; GO:0044424 intracellular part; GO:0005681 spliceosomal complex; GO:0005623 cell; GO:0044422 organelle part; GO:0043226 organelle; GO:0043231 intracellular membrane-bounded organelle; GO:0031974 membrane-enclosed lumen; GO:1902494 catalytic …	GO:0005515 protein binding; GO:0005488 binding;	K12867	SYF1, XAB2; pre-mRNA-splicing factor SYF1	hsa03040 Spliceosome - Homo sapiens (human);	IPR011990; IPR013026;	Tetratricopeptide-like helical domain; Tetratricopeptide repeat-containing domain;	A	KOG2047	mRNA splicing factor
Q9H6R4	Nucleolar protein 6 OS=Homo sapiens OX=9606 GN=NOL6 PE=1 SV=2	NOL6	127.59	6.3	0.865	0.19892	cytoplasm	GO:0044085 cellular component biogenesis; GO:0050658 RNA transport; GO:0046907 intracellular transport; GO:0022613 ribonucleoprotein complex biogenesis; GO:0006725 cellular aromatic compound metabolic process; GO:0044699 single-organism process; GO:0051168 nuclear export; GO:0051169 nuclear transport; GO:0044237 cellular metabolic process; GO:0015031 protein transport; GO:0051236 establishment of…	GO:0005737 cytoplasm; GO:0032991 macromolecular complex; GO:0044424 intracellular part; GO:0005623 cell; GO:0044422 organelle part; GO:0030684 preribosome; GO:0043228 non-membrane-bounded organelle; GO:0000793 condensed chromosome; GO:0031974 membrane-enclosed lumen; GO:0005654 nucleoplasm; GO:0070013 intracellular organelle lumen; GO:0044464 cell part; GO:0005622 intracellular; GO:0005694 chromo…	GO:0097159 organic cyclic compound binding; GO:1901363 heterocyclic compound binding; GO:0003723 RNA binding; GO:0005515 protein binding; GO:0005488 binding; GO:0003676 nucleic acid binding;	K14544	UTP22, NOL6; U3 small nucleolar RNA-associated protein 22	hsa03008 Ribosome biogenesis in eukaryotes - Homo sapiens (human);			S	KOG2054	Nucleolar RNA-associated protein (NRAP)
P84090	Enhancer of rudimentary homolog OS=Homo sapiens OX=9606 GN=ERH PE=1 SV=1	ERH	12.259	45.2	0.811	0.21042	cytoplasm	GO:0050794 regulation of cellular process; GO:0009116 nucleoside metabolic process; GO:0045747 positive regulation of Notch signaling pathway; GO:0009165 nucleotide biosynthetic process; GO:0006725 cellular aromatic compound metabolic process; GO:0009117 nucleotide metabolic process; GO:0023051 regulation of signaling; GO:0044699 single-organism process; GO:0006221 pyrimidine nucleotide biosynthe…	GO:1902494 catalytic complex; GO:0034709 methylosome; GO:0044464 cell part; GO:0005622 intracellular; GO:0005737 cytoplasm; GO:0030496 midbody; GO:0032991 macromolecular complex; GO:0044424 intracellular part; GO:1990234 transferase complex; GO:0005623 cell; GO:0044444 cytoplasmic part; GO:0034708 methyltransferase complex;	GO:0097159 organic cyclic compound binding; GO:1901363 heterocyclic compound binding; GO:0003677 DNA binding; GO:0003723 RNA binding; GO:1901265 nucleoside phosphate binding; GO:0008327 methyl-CpG binding; GO:0005488 binding; GO:0003676 nucleic acid binding; GO:0005515 protein binding; GO:0000166 nucleotide binding; GO:0043565 sequence-specific DNA binding; GO:0036094 small molecule binding;						R	KOG1766	Enhancer of rudimentary
P47985	Cytochrome b-c1 complex subunit Rieske, mitochondrial OS=Homo sapiens OX=9606 GN=UQCRFS1 PE=1 SV=2	UQCRFS1	29.668	13.9	1.095	0.126103	mitochondria	GO:0009116 nucleoside metabolic process; GO:0042278 purine nucleoside metabolic process; GO:0009167 purine ribonucleoside monophosphate metabolic process; GO:0009117 nucleotide metabolic process; GO:0044699 single-organism process; GO:0044237 cellular metabolic process; GO:0006796 phosphate-containing compound metabolic process; GO:0051234 establishment of localization; GO:0006122 mitochondrial e…	GO:0016020 membrane; GO:0098800 inner mitochondrial membrane protein complex; GO:0031090 organelle membrane; GO:0098796 membrane protein complex; GO:0005737 cytoplasm; GO:0032991 macromolecular complex; GO:0031224 intrinsic component of membrane; GO:0098798 mitochondrial protein complex; GO:0044424 intracellular part; GO:0044455 mitochondrial membrane part; GO:0005623 cell; GO:0044422 organelle p…	GO:0051537 2 iron, 2 sulfur cluster binding; GO:0008121 ubiquinol-cytochrome-c reductase activity; GO:0015075 ion transmembrane transporter activity; GO:0016679 oxidoreductase activity, acting on diphenols and related substances as donors; GO:0044877 macromolecular complex binding; GO:0043167 ion binding; GO:0022892 substrate-specific transporter activity; GO:0005515 protein binding; GO:0015077 m…	K00411	UQCRFS1, RIP1, petA; ubiquinol-cytochrome c reductase iron-sulfur subunit [EC:1.10.2.2]	hsa00190 Oxidative phosphorylation - Homo sapiens (human); hsa01100 Metabolic pathways - Homo sapiens (human); hsa04260 Cardiac muscle contraction - Homo sapiens (human); hsa04714 Thermogenesis - Homo sapiens (human); hsa04932 Non-alcoholic fatty liver disease (NAFLD) - Homo sapiens (human); hsa05010 Alzheimer disease - Homo sapiens (human); hsa05012 Parkinson disease - Homo sapiens (human); hsa0…	IPR006317; IPR017941; IPR015248; IPR005805; IPR011070; IPR004192;	Ubiquinol-cytochrome c reductase, iron-sulphur subunit; Rieske [2Fe-2S] iron-sulphur domain; Ubiquinol-cytochrome c reductase 8kDa, N-terminal; Rieske iron-sulphur protein, C-terminal; Globular protein, non-globular alpha/beta subunit; Ubiquinol cytochrome reductase, transmembrane domain;	C	KOG1671	Ubiquinol cytochrome c reductase, subunit RIP1
P15374	Ubiquitin carboxyl-terminal hydrolase isozyme L3 OS=Homo sapiens OX=9606 GN=UCHL3 PE=1 SV=1	UCHL3	26.182	27	0.794	0.0050212	cytoplasm	GO:0043632 modification-dependent macromolecule catabolic process; GO:0070646 protein modification by small protein removal; GO:0044265 cellular macromolecule catabolic process; GO:0051603 proteolysis involved in cellular protein catabolic process; GO:0044257 cellular protein catabolic process; GO:0016567 protein ubiquitination; GO:0019941 modification-dependent protein catabolic process; GO:0044…	GO:0043229 intracellular organelle; GO:0044421 extracellular region part; GO:0031982 vesicle; GO:0005737 cytoplasm; GO:0044424 intracellular part; GO:0005623 cell; GO:0005829 cytosol; GO:0005576 extracellular region; GO:0043231 intracellular membrane-bounded organelle; GO:0043226 organelle; GO:0070062 extracellular exosome; GO:0005634 nucleus; GO:0005622 intracellular; GO:0044464 cell part; GO:19…	GO:0004843 thiol-dependent ubiquitin-specific protease activity; GO:0019784 NEDD8-specific protease activity; GO:0008233 peptidase activity; GO:0036459 thiol-dependent ubiquitinyl hydrolase activity; GO:0003824 catalytic activity; GO:0005488 binding; GO:0043130 ubiquitin binding; GO:0101005 ubiquitinyl hydrolase activity; GO:0070011 peptidase activity, acting on L-amino acid peptides; GO:0019783 …	K05609	UCHL3, YUH1; ubiquitin carboxyl-terminal hydrolase L3 [EC:3.4.19.12]		IPR001578;	Peptidase C12, ubiquitin carboxyl-terminal hydrolase;	O	KOG1415	Ubiquitin C-terminal hydrolase UCHL1
Q9UKV8	Protein argonaute-2 OS=Homo sapiens OX=9606 GN=AGO2 PE=1 SV=3	AGO2	97.207	8.7	1.15	0.40278	cytoplasm	GO:0044085 cellular component biogenesis; GO:0044700 single organism signaling; GO:0022613 ribonucleoprotein complex biogenesis; GO:0006518 peptide metabolic process; GO:0022618 ribonucleoprotein complex assembly; GO:0007166 cell surface receptor signaling pathway; GO:0097659 nucleic acid-templated transcription; GO:0010608 posttranscriptional regulation of gene expression; GO:0009891 positive re…	GO:0016020 membrane; GO:0030425 dendrite; GO:1905348 endonuclease complex; GO:0030054 cell junction; GO:0000932 P-body; GO:0005737 cytoplasm; GO:0032991 macromolecular complex; GO:0044424 intracellular part; GO:0034518 RNA cap binding complex; GO:0005623 cell; GO:0044422 organelle part; GO:0036464 cytoplasmic ribonucleoprotein granule; GO:0043228 non-membrane-bounded organelle; GO:0031974 membran…	GO:0098808 mRNA cap binding; GO:0000339 RNA cap binding; GO:0000340 RNA 7-methylguanosine cap binding; GO:0004521 endoribonuclease activity; GO:0003743 translation initiation factor activity; GO:0005515 protein binding; GO:0016787 hydrolase activity; GO:0070063 RNA polymerase binding; GO:0001047 core promoter binding; GO:0035197 siRNA binding; GO:0000975 regulatory region DNA binding; GO:1901363 …	K11593	ELF2C, AGO; eukaryotic translation initiation factor 2C		IPR032472; IPR032474; IPR014811; IPR003165; IPR032473; IPR012337; IPR003100;	Argonaute linker 2 domain; Protein argonaute, N-terminal; Argonaute, linker 1 domain; Piwi domain; Protein argonaute, Mid domain; Ribonuclease H-like domain; PAZ domain;	J	KOG1041	Translation initiation factor 2C (eIF-2C) and related proteins
Q9Y385	Ubiquitin-conjugating enzyme E2 J1 OS=Homo sapiens OX=9606 GN=UBE2J1 PE=1 SV=2	UBE2J1	35.198	9.1	2.504	0.003924	cytoplasm	GO:0043413 macromolecule glycosylation; GO:0022414 reproductive process; GO:0032680 regulation of tumor necrosis factor production; GO:0090317 negative regulation of intracellular protein transport; GO:0036503 ERAD pathway; GO:0018196 peptidyl-asparagine modification; GO:1905897 regulation of response to endoplasmic reticulum stress; GO:0044237 cellular metabolic process; GO:1904293 negative regu…	GO:0043229 intracellular organelle; GO:0016020 membrane; GO:0042175 nuclear outer membrane-endoplasmic reticulum membrane network; GO:0005783 endoplasmic reticulum; GO:0044446 intracellular organelle part; GO:0005737 cytoplasm; GO:0031224 intrinsic component of membrane; GO:0012505 endomembrane system; GO:0044424 intracellular part; GO:0005623 cell; GO:0016021 integral component of membrane; GO:0…	GO:1901265 nucleoside phosphate binding; GO:0031625 ubiquitin protein ligase binding; GO:0005515 protein binding; GO:0097159 organic cyclic compound binding; GO:1901363 heterocyclic compound binding; GO:0061630 ubiquitin protein ligase activity; GO:0003824 catalytic activity; GO:0032553 ribonucleotide binding; GO:0005488 binding; GO:0032550 purine ribonucleoside binding; GO:0043168 anion binding;…	K10578	UBE2J1, NCUBE1, UBC6; ubiquitin-conjugating enzyme E2 J1 [EC:2.3.2.23]	hsa04120 Ubiquitin mediated proteolysis - Homo sapiens (human); hsa04141 Protein processing in endoplasmic reticulum - Homo sapiens (human); hsa05012 Parkinson disease - Homo sapiens (human);	IPR016135; IPR000608;	Ubiquitin-conjugating enzyme/RWD-like; Ubiquitin-conjugating enzyme E2;	O	KOG0428	Non-canonical ubiquitin conjugating enzyme 1
P51812	Ribosomal protein S6 kinase alpha-3 OS=Homo sapiens OX=9606 GN=RPS6KA3 PE=1 SV=1	RPS6KA3	83.735	19.5	1.618	0.0199182	nucleus	GO:0044700 single organism signaling; GO:0010941 regulation of cell death; GO:0010608 posttranscriptional regulation of gene expression; GO:0009891 positive regulation of biosynthetic process; GO:0043555 regulation of translation in response to stress; GO:0031347 regulation of defense response; GO:0044237 cellular metabolic process; GO:0045927 positive regulation of growth; GO:0009607 response to…	GO:0043229 intracellular organelle; GO:0044446 intracellular organelle part; GO:0005737 cytoplasm; GO:0031981 nuclear lumen; GO:0044424 intracellular part; GO:0005623 cell; GO:0005829 cytosol; GO:0044422 organelle part; GO:0043231 intracellular membrane-bounded organelle; GO:0043226 organelle; GO:0031974 membrane-enclosed lumen; GO:0005654 nucleoplasm; GO:0005634 nucleus; GO:0070013 intracellular…	GO:1901265 nucleoside phosphate binding; GO:0016773 phosphotransferase activity, alcohol group as acceptor; GO:0019901 protein kinase binding; GO:0061134 peptidase regulator activity; GO:0043028 cysteine-type endopeptidase regulator activity involved in apoptotic process; GO:0005515 protein binding; GO:0004672 protein kinase activity; GO:0004857 enzyme inhibitor activity; GO:0098772 molecular fun…	K04373	RPS6KA; ribosomal protein S6 kinase alpha-1/2/3/6 [EC:2.7.11.1]	hsa04010 MAPK signaling pathway - Homo sapiens (human); hsa04114 Oocyte meiosis - Homo sapiens (human); hsa04150 mTOR signaling pathway - Homo sapiens (human); hsa04714 Thermogenesis - Homo sapiens (human); hsa04720 Long-term potentiation - Homo sapiens (human); hsa04722 Neurotrophin signaling pathway - Homo sapiens (human); hsa04914 Progesterone-mediated oocyte maturation - Homo sapiens (human);…	IPR000719; IPR000961; IPR017892; IPR011009;	Protein kinase domain; AGC-kinase, C-terminal; Protein kinase, C-terminal; Protein kinase-like domain;	RT	KOG0598	Ribosomal protein S6 kinase and related proteins
P55072	Transitional endoplasmic reticulum ATPase OS=Homo sapiens OX=9606 GN=VCP PE=1 SV=4	VCP	89.321	59.4	0.798	0.0040646	cytoplasm,nucleus	GO:0044085 cellular component biogenesis; GO:0044700 single organism signaling; GO:0010941 regulation of cell death; GO:0032436 positive regulation of proteasomal ubiquitin-dependent protein catabolic process; GO:0009891 positive regulation of biosynthetic process; GO:0018196 peptidyl-asparagine modification; GO:0006914 autophagy; GO:0044237 cellular metabolic process; GO:1903364 positive regulat…	GO:0016020 membrane; GO:0044421 extracellular region part; GO:0005737 cytoplasm; GO:0044433 cytoplasmic vesicle part; GO:0032991 macromolecular complex; GO:0035578 azurophil granule lumen; GO:0005623 cell; GO:1904813 ficolin-1-rich granule lumen; GO:0044422 organelle part; GO:0043228 non-membrane-bounded organelle; GO:0005775 vacuolar lumen; GO:0070062 extracellular exosome; GO:0101002 ficolin-1-…	GO:1901265 nucleoside phosphate binding; GO:0019903 protein phosphatase binding; GO:0031625 ubiquitin protein ligase binding; GO:0005102 receptor binding; GO:0061134 peptidase regulator activity; GO:0016504 peptidase activator activity; GO:0016817 hydrolase activity, acting on acid anhydrides; GO:0035800 deubiquitinase activator activity; GO:0016787 hydrolase activity; GO:0005515 protein binding;…	K13525	VCP, CDC48; transitional endoplasmic reticulum ATPase	hsa04141 Protein processing in endoplasmic reticulum - Homo sapiens (human); hsa05134 Legionellosis - Homo sapiens (human);	IPR029067; IPR003959; IPR004201; IPR015415; IPR027417; IPR003593; IPR009010; IPR003338;	CDC48 domain 2-like; ATPase, AAA-type, core; CDC48, domain 2; Vps4 oligomerisation, C-terminal; P-loop containing nucleoside triphosphate hydrolase; AAA+ ATPase domain; Aspartate decarboxylase-like domain; CDC48, N-terminal subdomain;	O	KOG0730	AAA+-type ATPase
P40306	Proteasome subunit beta type-10 OS=Homo sapiens OX=9606 GN=PSMB10 PE=1 SV=1	PSMB10	28.936	25.6	0.919	0.36138	cytoplasm	GO:0044700 single organism signaling; GO:0065008 regulation of biological quality; GO:0032270 positive regulation of cellular protein metabolic process; GO:0002220 innate immune response activating cell surface receptor signaling pathway; GO:0007166 cell surface receptor signaling pathway; GO:0010608 posttranscriptional regulation of gene expression; GO:0051443 positive regulation of ubiquitin-pr…	GO:0043229 intracellular organelle; GO:0000502 proteasome complex; GO:1990111 spermatoproteasome complex; GO:0044446 intracellular organelle part; GO:0005737 cytoplasm; GO:0031981 nuclear lumen; GO:0032991 macromolecular complex; GO:0044424 intracellular part; GO:0005829 cytosol; GO:0005623 cell; GO:0044422 organelle part; GO:1905369 endopeptidase complex; GO:0031974 membrane-enclosed lumen; GO:0…	GO:0004175 endopeptidase activity; GO:0004298 threonine-type endopeptidase activity; GO:0008233 peptidase activity; GO:0070003 threonine-type peptidase activity; GO:0003824 catalytic activity; GO:0005488 binding; GO:0070011 peptidase activity, acting on L-amino acid peptides; GO:0016787 hydrolase activity; GO:0005515 protein binding;	K02733	PSMB10, MECL1; 20S proteasome subunit beta 10 [EC:3.4.25.1]	hsa03050 Proteasome - Homo sapiens (human);	IPR024689; IPR029055;	Proteasome beta subunit, C-terminal; Nucleophile aminohydrolases, N-terminal;	O	KOG0173	20S proteasome, regulatory subunit beta type PSMB7/PSMB10/PUP1
Q99829	Copine-1 OS=Homo sapiens OX=9606 GN=CPNE1 PE=1 SV=1	CPNE1	59.058	13.2	1.353	0.00066375	cytoplasm,nucleus	GO:0045321 leukocyte activation; GO:0051896 regulation of protein kinase B signaling; GO:0097659 nucleic acid-templated transcription; GO:0032989 cellular component morphogenesis; GO:0044255 cellular lipid metabolic process; GO:0044237 cellular metabolic process; GO:0008610 lipid biosynthetic process; GO:0008152 metabolic process; GO:1903265 positive regulation of tumor necrosis factor-mediated s…	GO:0016020 membrane; GO:0044421 extracellular region part; GO:0031410 cytoplasmic vesicle; GO:0031090 organelle membrane; GO:0071944 cell periphery; GO:0031982 vesicle; GO:0005737 cytoplasm; GO:0044433 cytoplasmic vesicle part; GO:0044424 intracellular part; GO:0005623 cell; GO:0044422 organelle part; GO:0005765 lysosomal membrane; GO:0031974 membrane-enclosed lumen; GO:0070062 extracellular exos…	GO:0005544 calcium-dependent phospholipid binding; GO:0008233 peptidase activity; GO:0046983 protein dimerization activity; GO:0043167 ion binding; GO:0016787 hydrolase activity; GO:0005515 protein binding; GO:0001786 phosphatidylserine binding; GO:0004175 endopeptidase activity; GO:0072341 modified amino acid binding; GO:0042802 identical protein binding; GO:0003824 catalytic activity; GO:004280…				IPR010734; IPR000008; IPR002035;	Copine; C2 domain; von Willebrand factor, type A;	T	KOG1327	Copine
Q99805	Transmembrane 9 superfamily member 2 OS=Homo sapiens OX=9606 GN=TM9SF2 PE=1 SV=1	TM9SF2	75.775	11.2	1.52	0.0728	plasma membrane	GO:0006810 transport; GO:0051179 localization; GO:0051234 establishment of localization;	GO:0016020 membrane; GO:0044421 extracellular region part; GO:0031410 cytoplasmic vesicle; GO:0031090 organelle membrane; GO:0071944 cell periphery; GO:0005737 cytoplasm; GO:0031982 vesicle; GO:0044433 cytoplasmic vesicle part; GO:0031224 intrinsic component of membrane; GO:0044424 intracellular part; GO:0005887 integral component of plasma membrane; GO:0005623 cell; GO:0044422 organelle part; GO…		K17086	TM9SF2_4; transmembrane 9 superfamily member 2/4				U	KOG1278	Endosomal membrane proteins, EMP70
Q9NYU2	UDP-glucose:glycoprotein glucosyltransferase 1 OS=Homo sapiens OX=9606 GN=UGGT1 PE=1 SV=3	UGGT1	177.19	23.8	0.873	0.0036802	plasma membrane	GO:0036508 protein alpha-1,2-demannosylation; GO:0043413 macromolecule glycosylation; GO:1904380 endoplasmic reticulum mannose trimming; GO:0006725 cellular aromatic compound metabolic process; GO:0006517 protein deglycosylation; GO:0044267 cellular protein metabolic process; GO:0044699 single-organism process; GO:0009058 biosynthetic process; GO:0044237 cellular metabolic process; GO:0071704 org…	GO:0005788 endoplasmic reticulum lumen; GO:0043229 intracellular organelle; GO:0005783 endoplasmic reticulum; GO:0044421 extracellular region part; GO:0005737 cytoplasm; GO:0044446 intracellular organelle part; GO:0031982 vesicle; GO:0012505 endomembrane system; GO:0044424 intracellular part; GO:0005623 cell; GO:0005576 extracellular region; GO:0044422 organelle part; GO:0031974 membrane-enclosed…	GO:0016758 transferase activity, transferring hexosyl groups; GO:0003824 catalytic activity; GO:0005488 binding; GO:0003980 UDP-glucose:glycoprotein glucosyltransferase activity; GO:0035251 UDP-glucosyltransferase activity; GO:0008194 UDP-glycosyltransferase activity; GO:0046527 glucosyltransferase activity; GO:0005515 protein binding; GO:0016757 transferase activity, transferring glycosyl groups…	K11718	HUGT; UDP-glucose:glycoprotein glucosyltransferase [EC:2.4.1.-]	hsa04141 Protein processing in endoplasmic reticulum - Homo sapiens (human);	IPR029044;	Nucleotide-diphospho-sugar transferases;	G	KOG1879	UDP-glucose:glycoprotein glucosyltransferase
Q9NRN5	Olfactomedin-like protein 3 OS=Homo sapiens OX=9606 GN=OLFML3 PE=2 SV=1	OLFML3	46.01	9.9	10.696	2.2856e-06	extracellular	GO:0032502 developmental process; GO:0044707 single-multicellular organism process; GO:0044767 single-organism developmental process; GO:0044699 single-organism process; GO:0007275 multicellular organism development; GO:0032501 multicellular organismal process; GO:0048856 anatomical structure development;	GO:0043226 organelle; GO:0044421 extracellular region part; GO:1903561 extracellular vesicle; GO:0031982 vesicle; GO:0043227 membrane-bounded organelle; GO:0005576 extracellular region; GO:0043230 extracellular organelle;					IPR003112;	Olfactomedin-like domain;	W	KOG3545	Olfactomedin and related extracellular matrix glycoproteins
P31949	Protein S100-A11 OS=Homo sapiens OX=9606 GN=S100A11 PE=1 SV=2	S100A11	11.74	52.4	0.519	0.00184347	cytoplasm	GO:0044700 single organism signaling; GO:0045321 leukocyte activation; GO:0044699 single-organism process; GO:0008285 negative regulation of cell proliferation; GO:0051234 establishment of localization; GO:0022610 biological adhesion; GO:0007165 signal transduction; GO:0007154 cell communication; GO:0007155 cell adhesion; GO:0010558 negative regulation of macromolecule biosynthetic process; GO:00…	GO:0034774 secretory granule lumen; GO:0005615 extracellular space; GO:0044421 extracellular region part; GO:0031410 cytoplasmic vesicle; GO:0030054 cell junction; GO:0031982 vesicle; GO:0005737 cytoplasm; GO:0044433 cytoplasmic vesicle part; GO:0044424 intracellular part; GO:0005913 cell-cell adherens junction; GO:0005911 cell-cell junction; GO:0005623 cell; GO:0044422 organelle part; GO:0070062…	GO:0043167 ion binding; GO:0046983 protein dimerization activity; GO:0005515 protein binding; GO:0098632 protein binding involved in cell-cell adhesion; GO:0048306 calcium-dependent protein binding; GO:0050839 cell adhesion molecule binding; GO:0098641 cadherin binding involved in cell-cell adhesion; GO:0042802 identical protein binding; GO:0098631 protein binding involved in cell adhesion; GO:00…				IPR011992; IPR002048; IPR013787;	EF-hand domain pair; EF-hand domain; S100/CaBP-9k-type, calcium binding, subdomain;
Q9Y285	Phenylalanine--tRNA ligase alpha subunit OS=Homo sapiens OX=9606 GN=FARSA PE=1 SV=3	FARSA	57.563	23.8	1.185	0.101221	nucleus	GO:0044085 cellular component biogenesis; GO:0016043 cellular component organization; GO:0006518 peptide metabolic process; GO:0006725 cellular aromatic compound metabolic process; GO:0044267 cellular protein metabolic process; GO:0044699 single-organism process; GO:0009058 biosynthetic process; GO:1901566 organonitrogen compound biosynthetic process; GO:0043039 tRNA aminoacylation; GO:0044237 ce…	GO:0016020 membrane; GO:1902494 catalytic complex; GO:0044464 cell part; GO:0005622 intracellular; GO:0009328 phenylalanine-tRNA ligase complex; GO:0005737 cytoplasm; GO:0032991 macromolecular complex; GO:0044424 intracellular part; GO:0005829 cytosol; GO:0005623 cell; GO:0044444 cytoplasmic part;	GO:0016876 ligase activity, forming aminoacyl-tRNA and related compounds; GO:0003723 RNA binding; GO:0005524 ATP binding; GO:1901265 nucleoside phosphate binding; GO:0016875 ligase activity, forming carbon-oxygen bonds; GO:0016874 ligase activity; GO:0001882 nucleoside binding; GO:0043167 ion binding; GO:0004826 phenylalanine-tRNA ligase activity; GO:0005515 protein binding; GO:0000166 nucleotide…	K01889	FARSA, pheS; phenylalanyl-tRNA synthetase alpha chain [EC:6.1.1.20]	hsa00970 Aminoacyl-tRNA biosynthesis - Homo sapiens (human);	IPR011991; IPR002319; IPR006195;	Winged helix-turn-helix DNA-binding domain; Phenylalanyl-tRNA synthetase; Aminoacyl-tRNA synthetase, class II;	J	KOG2784	Phenylalanyl-tRNA synthetase, beta subunit
Q9HC36	rRNA methyltransferase 3, mitochondrial OS=Homo sapiens OX=9606 GN=MRM3 PE=1 SV=2	MRM3	47.019	8.3	1.6	0.0057776	mitochondria	GO:0044085 cellular component biogenesis; GO:0022613 ribonucleoprotein complex biogenesis; GO:0006725 cellular aromatic compound metabolic process; GO:0000154 rRNA modification; GO:0009451 RNA modification; GO:0044237 cellular metabolic process; GO:0032259 methylation; GO:0071704 organic substance metabolic process; GO:0008152 metabolic process; GO:0046483 heterocycle metabolic process; GO:000613…	GO:0005759 mitochondrial matrix; GO:0043229 intracellular organelle; GO:0044429 mitochondrial part; GO:0005737 cytoplasm; GO:0044446 intracellular organelle part; GO:0044424 intracellular part; GO:0005623 cell; GO:0005739 mitochondrion; GO:0044422 organelle part; GO:0031974 membrane-enclosed lumen; GO:0043226 organelle; GO:0043231 intracellular membrane-bounded organelle; GO:0070013 intracellular…	GO:0008757 S-adenosylmethionine-dependent methyltransferase activity; GO:0003723 RNA binding; GO:0008168 methyltransferase activity; GO:0016741 transferase activity, transferring one-carbon groups; GO:0005515 protein binding; GO:0008171 O-methyltransferase activity; GO:0070039 rRNA (guanosine-2'-O-)-methyltransferase activity; GO:0016435 rRNA (guanine) methyltransferase activity; GO:1901363 heter…	K20095	RNMTL1; 16S rRNA (guanosine(1370)-2'-O)-methyltransferase [EC:2.1.1.-]		IPR001537; IPR029028; IPR029064; IPR013123; IPR029026;	tRNA/rRNA methyltransferase, SpoU type; Alpha/beta knot methyltransferases; 50S ribosomal protein L30e-like; RNA 2-O ribose methyltransferase, substrate binding; tRNA (guanine-N1-)-methyltransferase, N-terminal;	J	KOG2506	SpoU rRNA Methylase family protein
P61764	Syntaxin-binding protein 1 OS=Homo sapiens OX=9606 GN=STXBP1 PE=1 SV=1	STXBP1	67.568	21.7	0.802	0.22228	cytoplasm	GO:0060627 regulation of vesicle-mediated transport; GO:0044700 single organism signaling; GO:0007596 blood coagulation; GO:0021700 developmental maturation; GO:0010941 regulation of cell death; GO:0065008 regulation of biological quality; GO:0043523 regulation of neuron apoptotic process; GO:0007269 neurotransmitter secretion; GO:0032989 cellular component morphogenesis; GO:0031338 regulation of…	GO:0016020 membrane; GO:0044421 extracellular region part; GO:0031410 cytoplasmic vesicle; GO:0071944 cell periphery; GO:0031982 vesicle; GO:0005737 cytoplasm; GO:0032991 macromolecular complex; GO:0044424 intracellular part; GO:0005623 cell; GO:0042734 presynaptic membrane; GO:0043679 axon terminus; GO:0044422 organelle part; GO:0031974 membrane-enclosed lumen; GO:0070062 extracellular exosome; …	GO:0000149 SNARE binding; GO:0003723 RNA binding; GO:0047485 protein N-terminus binding; GO:0019901 protein kinase binding; GO:0005515 protein binding; GO:0019900 kinase binding; GO:1901363 heterocyclic compound binding; GO:0097159 organic cyclic compound binding; GO:0017075 syntaxin-1 binding; GO:0042802 identical protein binding; GO:0005488 binding; GO:0003676 nucleic acid binding; GO:0019904 p…	K15292	STXBP1, MUNC18-1; syntaxin-binding protein 1	hsa04721 Synaptic vesicle cycle - Homo sapiens (human);	IPR027482;	Sec1-like, domain 2;	U	KOG1300	Vesicle trafficking protein Sec1
O75592	E3 ubiquitin-protein ligase MYCBP2 OS=Homo sapiens OX=9606 GN=MYCBP2 PE=1 SV=4	MYCBP2	513.63	0.7	1.466	0.00100498	nucleus	GO:0050794 regulation of cellular process; GO:0006725 cellular aromatic compound metabolic process; GO:0097659 nucleic acid-templated transcription; GO:0060255 regulation of macromolecule metabolic process; GO:0019219 regulation of nucleobase-containing compound metabolic process; GO:0044267 cellular protein metabolic process; GO:0009058 biosynthetic process; GO:0044237 cellular metabolic process…	GO:0043226 organelle; GO:0043231 intracellular membrane-bounded organelle; GO:0043229 intracellular organelle; GO:0016020 membrane; GO:0005634 nucleus; GO:0044464 cell part; GO:0005622 intracellular; GO:0044424 intracellular part; GO:0043227 membrane-bounded organelle; GO:0005623 cell;	GO:0046914 transition metal ion binding; GO:0003824 catalytic activity; GO:0005488 binding; GO:0043167 ion binding; GO:0043169 cation binding; GO:0046872 metal ion binding; GO:0005515 protein binding; GO:0008270 zinc ion binding; GO:0016740 transferase activity;	K10693	MYCBP2, PAM; E3 ubiquitin-protein ligase MYCBP2 [EC:2.3.2.27]		IPR003646; IPR004939; IPR001841; IPR014756; IPR012983; IPR009091; IPR013783; IPR013083; IPR008979;	SH3-like domain, bacterial-type; APC10/DOC domain; Zinc finger, RING-type; Immunoglobulin E-set; PHR; Regulator of chromosome condensation 1/beta-lactamase-inhibitor protein II; Immunoglobulin-like fold; Zinc finger, RING/FYVE/PHD-type; Galactose-binding domain-like;	T	KOG1428	Inhibitor of type V adenylyl cyclases/Neuronal presynaptic protein Highwire/PAM/RPM-1
Q7Z7N9	Transmembrane protein 179B OS=Homo sapiens OX=9606 GN=TMEM179B PE=1 SV=1	TMEM179B	23.55	7.3			plasma membrane	GO:0045321 leukocyte activation; GO:0002283 neutrophil activation involved in immune response; GO:0002252 immune effector process; GO:0044699 single-organism process; GO:0050896 response to stimulus; GO:0051234 establishment of localization; GO:1902578 single-organism localization; GO:0002275 myeloid cell activation involved in immune response; GO:0036230 granulocyte activation; GO:0009987 cellul…	GO:0016020 membrane; GO:0031090 organelle membrane; GO:0031410 cytoplasmic vesicle; GO:0071944 cell periphery; GO:0031982 vesicle; GO:0005737 cytoplasm; GO:0044433 cytoplasmic vesicle part; GO:0031224 intrinsic component of membrane; GO:0044424 intracellular part; GO:0016604 nuclear body; GO:0005623 cell; GO:0044422 organelle part; GO:0043228 non-membrane-bounded organelle; GO:0005765 lysosomal m…
Q96GX9	Methylthioribulose-1-phosphate dehydratase OS=Homo sapiens OX=9606 GN=APIP PE=1 SV=1	APIP	27.125	17.4	0.679	0.047979	cytoplasm	GO:0044085 cellular component biogenesis; GO:0010941 regulation of cell death; GO:0000097 sulfur amino acid biosynthetic process; GO:0016053 organic acid biosynthetic process; GO:0023051 regulation of signaling; GO:0044699 single-organism process; GO:0009058 biosynthetic process; GO:0044237 cellular metabolic process; GO:0000096 sulfur amino acid metabolic process; GO:0044272 sulfur compound bios…	GO:0044424 intracellular part; GO:0005623 cell; GO:0044464 cell part; GO:0005622 intracellular; GO:0005737 cytoplasm;	GO:0042802 identical protein binding; GO:0046914 transition metal ion binding; GO:0003824 catalytic activity; GO:0046570 methylthioribulose 1-phosphate dehydratase activity; GO:0005488 binding; GO:0043167 ion binding; GO:0046872 metal ion binding; GO:0043169 cation binding; GO:0016829 lyase activity; GO:0005515 protein binding; GO:0016836 hydro-lyase activity; GO:0008270 zinc ion binding; GO:0016…	K08964	mtnB; methylthioribulose-1-phosphate dehydratase [EC:4.2.1.109]	hsa00270 Cysteine and methionine metabolism - Homo sapiens (human); hsa01100 Metabolic pathways - Homo sapiens (human);	IPR001303;	Class II aldolase/adducin N-terminal;	G	KOG2631	Class II aldolase/adducin N-terminal domain protein
P33527	Multidrug resistance-associated protein 1 OS=Homo sapiens OX=9606 GN=ABCC1 PE=1 SV=3	ABCC1	171.59	11.1	1.486	0.051296	plasma membrane	GO:0098661 inorganic anion transmembrane transport; GO:0072337 modified amino acid transport; GO:0090662 ATP hydrolysis coupled transmembrane transport; GO:1901568 fatty acid derivative metabolic process; GO:0044699 single-organism process; GO:0044255 cellular lipid metabolic process; GO:0044237 cellular metabolic process; GO:0034635 glutathione transport; GO:0051234 establishment of localization…	GO:0016323 basolateral plasma membrane; GO:0016020 membrane; GO:0044421 extracellular region part; GO:0031226 intrinsic component of plasma membrane; GO:0071944 cell periphery; GO:0031982 vesicle; GO:0031224 intrinsic component of membrane; GO:0005887 integral component of plasma membrane; GO:0005623 cell; GO:0005576 extracellular region; GO:0016021 integral component of membrane; GO:0005886 plas…	GO:0042625 ATPase coupled ion transmembrane transporter activity; GO:1901265 nucleoside phosphate binding; GO:0015399 primary active transmembrane transporter activity; GO:0042910 xenobiotic transporter activity; GO:0022892 substrate-specific transporter activity; GO:0090482 vitamin transmembrane transporter activity; GO:0016817 hydrolase activity, acting on acid anhydrides; GO:0016787 hydrolase …	K05665	ABCC1; ATP-binding cassette, subfamily C (CFTR/MRP), member 1	hsa01523 Antifolate resistance - Homo sapiens (human); hsa02010 ABC transporters - Homo sapiens (human); hsa04071 Sphingolipid signaling pathway - Homo sapiens (human); hsa04977 Vitamin digestion and absorption - Homo sapiens (human); hsa05206 MicroRNAs in cancer - Homo sapiens (human);	IPR003593; IPR003439; IPR027417; IPR011527;	AAA+ ATPase domain; ABC transporter-like; P-loop containing nucleoside triphosphate hydrolase; ABC transporter type 1, transmembrane domain;	Q	KOG0054	Multidrug resistance-associated protein/mitoxantrone resistance protein, ABC superfamily
P08648	Integrin alpha-5 OS=Homo sapiens OX=9606 GN=ITGA5 PE=1 SV=2	ITGA5	114.54	9.1	1.615	0.040416	nucleus	GO:0044700 single organism signaling; GO:0044085 cellular component biogenesis; GO:0044409 entry into host; GO:0010941 regulation of cell death; GO:0030335 positive regulation of cell migration; GO:0032270 positive regulation of cellular protein metabolic process; GO:0007166 cell surface receptor signaling pathway; GO:0050877 neurological system process; GO:0007610 behavior; GO:0007492 endoderm d…	GO:0016020 membrane; GO:0098636 protein complex involved in cell adhesion; GO:0005783 endoplasmic reticulum; GO:0009897 external side of plasma membrane; GO:0031410 cytoplasmic vesicle; GO:0098796 membrane protein complex; GO:0030054 cell junction; GO:0071944 cell periphery; GO:0031982 vesicle; GO:0005737 cytoplasm; GO:0032991 macromolecular complex; GO:0031224 intrinsic component of membrane; GO…	GO:0005102 receptor binding; GO:0043167 ion binding; GO:0005126 cytokine receptor binding; GO:0044877 macromolecular complex binding; GO:0070851 growth factor receptor binding; GO:0005172 vascular endothelial growth factor receptor binding; GO:0005515 protein binding; GO:0005178 integrin binding; GO:0001618 virus receptor activity; GO:0050839 cell adhesion molecule binding; GO:0005161 platelet-de…	K06484	ITGA5, CD49e; integrin alpha 5	hsa04145 Phagosome - Homo sapiens (human); hsa04151 PI3K-Akt signaling pathway - Homo sapiens (human); hsa04510 Focal adhesion - Homo sapiens (human); hsa04512 ECM-receptor interaction - Homo sapiens (human); hsa04640 Hematopoietic cell lineage - Homo sapiens (human); hsa04810 Regulation of actin cytoskeleton - Homo sapiens (human); hsa05100 Bacterial invasion of epithelial cells - Homo sapiens (…	IPR032695; IPR013649;	Integrin domain; Integrin alpha-2;	W	KOG3637	Vitronectin receptor, alpha subunit
Q6UX04	Spliceosome-associated protein CWC27 homolog OS=Homo sapiens OX=9606 GN=CWC27 PE=1 SV=1	CWC27	53.846	11.9	1.255	0.41642	nucleus	GO:0006725 cellular aromatic compound metabolic process; GO:0044267 cellular protein metabolic process; GO:0044237 cellular metabolic process; GO:0071704 organic substance metabolic process; GO:0006457 protein folding; GO:0000398 mRNA splicing, via spliceosome; GO:0008152 metabolic process; GO:0000377 RNA splicing, via transesterification reactions with bulged adenosine as nucleophile; GO:0046483…	GO:0043229 intracellular organelle; GO:0044446 intracellular organelle part; GO:0032991 macromolecular complex; GO:0031981 nuclear lumen; GO:0044424 intracellular part; GO:0005681 spliceosomal complex; GO:0005623 cell; GO:0044422 organelle part; GO:0043226 organelle; GO:0043231 intracellular membrane-bounded organelle; GO:0031974 membrane-enclosed lumen; GO:1902494 catalytic complex; GO:0005654 n…	GO:0003755 peptidyl-prolyl cis-trans isomerase activity; GO:0016853 isomerase activity; GO:0003824 catalytic activity; GO:0016859 cis-trans isomerase activity;	K12737	SDCCAG10; peptidyl-prolyl cis-trans isomerase SDCCAG10 [EC:5.2.1.8]		IPR002130; IPR029000;	Cyclophilin-type peptidyl-prolyl cis-trans isomerase domain; Cyclophilin-like domain;	O	KOG0885	Peptidyl-prolyl cis-trans isomerase
P62136	Serine/threonine-protein phosphatase PP1-alpha catalytic subunit OS=Homo sapiens OX=9606 GN=PPP1CA PE=1 SV=1	PPP1CA	37.512	45.8	1.197	0.50584	cytoplasm	GO:0044700 single organism signaling; GO:0010941 regulation of cell death; GO:0065008 regulation of biological quality; GO:0005981 regulation of glycogen catabolic process; GO:0032885 regulation of polysaccharide biosynthetic process; GO:0007166 cell surface receptor signaling pathway; GO:0030323 respiratory tube development; GO:0010608 posttranscriptional regulation of gene expression; GO:004355…	GO:0016020 membrane; GO:0030425 dendrite; GO:0044421 extracellular region part; GO:0071944 cell periphery; GO:0030054 cell junction; GO:0031982 vesicle; GO:0005737 cytoplasm; GO:0043025 neuronal cell body; GO:0032991 macromolecular complex; GO:0008287 protein serine/threonine phosphatase complex; GO:0044424 intracellular part; GO:0005913 cell-cell adherens junction; GO:0072357 PTW/PP1 phosphatase…	GO:0019903 protein phosphatase binding; GO:0004722 protein serine/threonine phosphatase activity; GO:0016791 phosphatase activity; GO:0044877 macromolecular complex binding; GO:0043167 ion binding; GO:0005515 protein binding; GO:0016787 hydrolase activity; GO:0004721 phosphoprotein phosphatase activity; GO:0098632 protein binding involved in cell-cell adhesion; GO:0050839 cell adhesion molecule b…	K06269	PPP1C; serine/threonine-protein phosphatase PP1 catalytic subunit [EC:3.1.3.16]	hsa03015 mRNA surveillance pathway - Homo sapiens (human); hsa04022 cGMP-PKG signaling pathway - Homo sapiens (human); hsa04024 cAMP signaling pathway - Homo sapiens (human); hsa04114 Oocyte meiosis - Homo sapiens (human); hsa04218 Cellular senescence - Homo sapiens (human); hsa04261 Adrenergic signaling in cardiomyocytes - Homo sapiens (human); hsa04270 Vascular smooth muscle contraction - Homo …	IPR029052; IPR004843; IPR031675; IPR006186;	Metallo-dependent phosphatase-like; Calcineurin-like phosphoesterase domain, ApaH type; Serine-threonine protein phosphatase, N-terminal; Serine/threonine-specific protein phosphatase/bis(5-nucleosyl)-tetraphosphatase;
Q7L014	Probable ATP-dependent RNA helicase DDX46 OS=Homo sapiens OX=9606 GN=DDX46 PE=1 SV=2	DDX46	117.36	25.4	1.098	0.088423	nucleus	GO:0006396 RNA processing; GO:0010468 regulation of gene expression; GO:0006725 cellular aromatic compound metabolic process; GO:0060255 regulation of macromolecule metabolic process; GO:0006807 nitrogen compound metabolic process; GO:1901360 organic cyclic compound metabolic process; GO:0044238 primary metabolic process; GO:0044237 cellular metabolic process; GO:0071704 organic substance metabol…	GO:0043229 intracellular organelle; GO:0016020 membrane; GO:0043232 intracellular non-membrane-bounded organelle; GO:0044446 intracellular organelle part; GO:0031981 nuclear lumen; GO:0044424 intracellular part; GO:0044452 nucleolar part; GO:0005730 nucleolus; GO:0016604 nuclear body; GO:0005623 cell; GO:0001650 fibrillar center; GO:0015030 Cajal body; GO:0044422 organelle part; GO:0043228 non-me…	GO:1901265 nucleoside phosphate binding; GO:0008026 ATP-dependent helicase activity; GO:0016817 hydrolase activity, acting on acid anhydrides; GO:0016787 hydrolase activity; GO:0016887 ATPase activity; GO:1901363 heterocyclic compound binding; GO:0097159 organic cyclic compound binding; GO:0016462 pyrophosphatase activity; GO:0003824 catalytic activity; GO:0032553 ribonucleotide binding; GO:00054…	K12811	DDX46, PRP5; ATP-dependent RNA helicase DDX46/PRP5 [EC:3.6.4.13]	hsa03040 Spliceosome - Homo sapiens (human);	IPR014014; IPR011545; IPR014001; IPR027417; IPR001650;	RNA helicase, DEAD-box type, Q motif; DEAD/DEAH box helicase domain; Helicase superfamily 1/2, ATP-binding domain; P-loop containing nucleoside triphosphate hydrolase; Helicase, C-terminal;	A	KOG0334	RNA helicase
P18440	Arylamine N-acetyltransferase 1 OS=Homo sapiens OX=9606 GN=NAT1 PE=1 SV=2	NAT1	33.898	9.7	1.185	0.034678	cytoplasm	GO:0071466 cellular response to xenobiotic stimulus; GO:0051716 cellular response to stimulus; GO:0008152 metabolic process; GO:0042221 response to chemical; GO:0006805 xenobiotic metabolic process; GO:0009410 response to xenobiotic stimulus; GO:0050896 response to stimulus; GO:0009987 cellular process; GO:0044237 cellular metabolic process; GO:0070887 cellular response to chemical stimulus;	GO:0044464 cell part; GO:0005622 intracellular; GO:0005737 cytoplasm; GO:0044424 intracellular part; GO:0005623 cell; GO:0005829 cytosol; GO:0044444 cytoplasmic part;	GO:0004060 arylamine N-acetyltransferase activity; GO:0016746 transferase activity, transferring acyl groups; GO:0008080 N-acetyltransferase activity; GO:0016747 transferase activity, transferring acyl groups other than amino-acyl groups; GO:0003824 catalytic activity; GO:0016740 transferase activity; GO:0016407 acetyltransferase activity; GO:0016410 N-acyltransferase activity;	K00622	nat; arylamine N-acetyltransferase [EC:2.3.1.5]	hsa00232 Caffeine metabolism - Homo sapiens (human); hsa00983 Drug metabolism - other enzymes - Homo sapiens (human); hsa01100 Metabolic pathways - Homo sapiens (human); hsa05204 Chemical carcinogenesis - Homo sapiens (human);
Q9P121	Neurotrimin OS=Homo sapiens OX=9606 GN=NTM PE=1 SV=1	NTM	37.971	8.7	1.559	0.00193755	plasma membrane	GO:0043687 post-translational protein modification; GO:0044707 single-multicellular organism process; GO:0048666 neuron development; GO:0048869 cellular developmental process; GO:0044267 cellular protein metabolic process; GO:0044699 single-organism process; GO:0022008 neurogenesis; GO:0009058 biosynthetic process; GO:0008038 neuron recognition; GO:0008037 cell recognition; GO:0044237 cellular me…	GO:0016020 membrane; GO:0044464 cell part; GO:0071944 cell periphery; GO:0044425 membrane part; GO:0031225 anchored component of membrane; GO:0031224 intrinsic component of membrane; GO:0005623 cell; GO:0005576 extracellular region; GO:0005886 plasma membrane;	GO:0005515 protein binding; GO:0005488 binding;	K06774	HNT; neurotrimin		IPR003598; IPR007110; IPR013783; IPR003599; IPR013151; IPR013098;	Immunoglobulin subtype 2; Immunoglobulin-like domain; Immunoglobulin-like fold; Immunoglobulin subtype; Immunoglobulin; Immunoglobulin I-set;
Q13243	Serine/arginine-rich splicing factor 5 OS=Homo sapiens OX=9606 GN=SRSF5 PE=1 SV=1	SRSF5	31.263	22.1	0.838	0.49804	nucleus	GO:0044085 cellular component biogenesis; GO:0050658 RNA transport; GO:0022613 ribonucleoprotein complex biogenesis; GO:0048732 gland development; GO:0022618 ribonucleoprotein complex assembly; GO:0097659 nucleic acid-templated transcription; GO:0051169 nuclear transport; GO:0044237 cellular metabolic process; GO:0015031 protein transport; GO:0008152 metabolic process; GO:0065003 macromolecular c…	GO:0043229 intracellular organelle; GO:0043232 intracellular non-membrane-bounded organelle; GO:0005737 cytoplasm; GO:0044446 intracellular organelle part; GO:0031981 nuclear lumen; GO:0044424 intracellular part; GO:0005730 nucleolus; GO:0016604 nuclear body; GO:0005829 cytosol; GO:0005623 cell; GO:0044422 organelle part; GO:0043228 non-membrane-bounded organelle; GO:0043226 organelle; GO:0043231…	GO:0003723 RNA binding; GO:1901265 nucleoside phosphate binding; GO:0019901 protein kinase binding; GO:0005515 protein binding; GO:0000166 nucleotide binding; GO:0019900 kinase binding; GO:1901363 heterocyclic compound binding; GO:0097159 organic cyclic compound binding; GO:0043422 protein kinase B binding; GO:0005488 binding; GO:0003676 nucleic acid binding; GO:0050733 RS domain binding; GO:0019…	K12893	SFRS4_5_6; splicing factor, arginine/serine-rich 4/5/6	hsa03040 Spliceosome - Homo sapiens (human); hsa05168 Herpes simplex virus 1 infection - Homo sapiens (human);	IPR000504; IPR012677;	RNA recognition motif domain; Nucleotide-binding alpha-beta plait domain;	A	KOG0106	Alternative splicing factor SRp55/B52/SRp75 (RRM superfamily)
Q9UNL2	Translocon-associated protein subunit gamma OS=Homo sapiens OX=9606 GN=SSR3 PE=1 SV=1	SSR3	21.08	16.2	0.551	0.00126477	plasma membrane	GO:0046907 intracellular transport; GO:0072599 establishment of protein localization to endoplasmic reticulum; GO:0072594 establishment of protein localization to organelle; GO:0072657 protein localization to membrane; GO:0045047 protein targeting to ER; GO:0071702 organic substance transport; GO:0006613 cotranslational protein targeting to membrane; GO:0015031 protein transport; GO:0051641 cellu…	GO:0043229 intracellular organelle; GO:0016020 membrane; GO:0042175 nuclear outer membrane-endoplasmic reticulum membrane network; GO:0005783 endoplasmic reticulum; GO:0044446 intracellular organelle part; GO:0005737 cytoplasm; GO:0031224 intrinsic component of membrane; GO:0012505 endomembrane system; GO:0044424 intracellular part; GO:0005623 cell; GO:0016021 integral component of membrane; GO:0…		K13251	SSR3; translocon-associated protein subunit gamma	hsa04141 Protein processing in endoplasmic reticulum - Homo sapiens (human);			U	KOG4490	Translocon-associated complex TRAP, gamma subunit
Q8WUM4	Programmed cell death 6-interacting protein OS=Homo sapiens OX=9606 GN=PDCD6IP PE=1 SV=1	PDCD6IP	96.022	49.2	0.802	0.00153841	cytoplasm	GO:0060627 regulation of vesicle-mediated transport; GO:0044085 cellular component biogenesis; GO:0065008 regulation of biological quality; GO:0010256 endomembrane system organization; GO:0035088 establishment or maintenance of apical/basal cell polarity; GO:0045216 cell-cell junction organization; GO:0051046 regulation of secretion; GO:0044699 single-organism process; GO:0032506 cytokinetic proc…	GO:0016020 membrane; GO:0005783 endoplasmic reticulum; GO:0044421 extracellular region part; GO:0031410 cytoplasmic vesicle; GO:0071944 cell periphery; GO:0030054 cell junction; GO:0031982 vesicle; GO:0005737 cytoplasm; GO:0044424 intracellular part; GO:0005623 cell; GO:0044422 organelle part; GO:0048770 pigment granule; GO:0043228 non-membrane-bounded organelle; GO:0005856 cytoskeleton; GO:00700…	GO:0042802 identical protein binding; GO:0005102 receptor binding; GO:0042803 protein homodimerization activity; GO:0005488 binding; GO:0046983 protein dimerization activity; GO:0005515 protein binding; GO:0001664 G-protein coupled receptor binding; GO:0048306 calcium-dependent protein binding; GO:0031871 proteinase activated receptor binding;	K12200	PDCD6IP, ALIX, RIM20; programmed cell death 6-interacting protein	hsa04144 Endocytosis - Homo sapiens (human);	IPR025304; IPR004328;	ALIX V-shaped domain; BRO1 domain;	R	KOG2220	Predicted signal transduction protein
Q8WWM7	Ataxin-2-like protein OS=Homo sapiens OX=9606 GN=ATXN2L PE=1 SV=2	ATXN2L	113.37	21.6	0.974	0.74168	nucleus	GO:0050794 regulation of cellular process; GO:0044085 cellular component biogenesis; GO:0016043 cellular component organization; GO:0034622 cellular macromolecular complex assembly; GO:0022613 ribonucleoprotein complex biogenesis; GO:0010603 regulation of cytoplasmic mRNA processing body assembly; GO:0022618 ribonucleoprotein complex assembly; GO:0033043 regulation of organelle organization; GO:0…	GO:0016020 membrane; GO:0005737 cytoplasm; GO:0032991 macromolecular complex; GO:0044424 intracellular part; GO:0016604 nuclear body; GO:0005623 cell; GO:0044422 organelle part; GO:0036464 cytoplasmic ribonucleoprotein granule; GO:0043228 non-membrane-bounded organelle; GO:0031974 membrane-enclosed lumen; GO:0005654 nucleoplasm; GO:0070013 intracellular organelle lumen; GO:0016607 nuclear speck; …	GO:0097159 organic cyclic compound binding; GO:1901363 heterocyclic compound binding; GO:0050839 cell adhesion molecule binding; GO:0003723 RNA binding; GO:0005488 binding; GO:0045296 cadherin binding; GO:0003676 nucleic acid binding; GO:0005515 protein binding;				IPR009604; IPR025852; IPR009818;	LsmAD domain; Ataxin 2, SM domain; Ataxin-2, C-terminal;	A	KOG2375	Protein interacting with poly(A)-binding protein
Q9NYB9	Abl interactor 2 OS=Homo sapiens OX=9606 GN=ABI2 PE=1 SV=1	ABI2	55.663	8	1.18	0.37008	nucleus	GO:0044700 single organism signaling; GO:0030833 regulation of actin filament polymerization; GO:0065008 regulation of biological quality; GO:0032270 positive regulation of cellular protein metabolic process; GO:0051674 localization of cell; GO:0018212 peptidyl-tyrosine modification; GO:0034315 regulation of Arp2/3 complex-mediated actin nucleation; GO:0044699 single-organism process; GO:0044764 …	GO:0031252 cell leading edge; GO:0043229 intracellular organelle; GO:0042995 cell projection; GO:0043232 intracellular non-membrane-bounded organelle; GO:0005737 cytoplasm; GO:0032991 macromolecular complex; GO:0044424 intracellular part; GO:0098858 actin-based cell projection; GO:0005623 cell; GO:0005829 cytosol; GO:0043228 non-membrane-bounded organelle; GO:0031209 SCAR complex; GO:0043226 orga…	GO:0003677 DNA binding; GO:0030674 protein binding, bridging; GO:0030295 protein kinase activator activity; GO:0031625 ubiquitin protein ligase binding; GO:0044877 macromolecular complex binding; GO:0030296 protein tyrosine kinase activator activity; GO:0005515 protein binding; GO:0019887 protein kinase regulator activity; GO:0019207 kinase regulator activity; GO:0019900 kinase binding; GO:009877…	K05751	ABI2; abl interactor 2	hsa04810 Regulation of actin cytoskeleton - Homo sapiens (human);	IPR000727; IPR001452; IPR012849;	Target SNARE coiled-coil homology domain; SH3 domain; Abl-interactor, homeo-domain homologous domain;
Q15397	Pumilio homolog 3 OS=Homo sapiens OX=9606 GN=PUM3 PE=1 SV=3	PUM3	73.584	6.8	1.043	0.29924	nucleus	GO:0050794 regulation of cellular process; GO:0010468 regulation of gene expression; GO:0031326 regulation of cellular biosynthetic process; GO:0080090 regulation of primary metabolic process; GO:0010608 posttranscriptional regulation of gene expression; GO:0060255 regulation of macromolecule metabolic process; GO:0010559 regulation of glycoprotein biosynthetic process; GO:0031399 regulation of p…	GO:0043229 intracellular organelle; GO:0005783 endoplasmic reticulum; GO:0043232 intracellular non-membrane-bounded organelle; GO:0044446 intracellular organelle part; GO:0005737 cytoplasm; GO:0031981 nuclear lumen; GO:0012505 endomembrane system; GO:0044424 intracellular part; GO:0005730 nucleolus; GO:0005623 cell; GO:0044422 organelle part; GO:0043228 non-membrane-bounded organelle; GO:0043231 …	GO:0097159 organic cyclic compound binding; GO:1901363 heterocyclic compound binding; GO:0003677 DNA binding; GO:0003729 mRNA binding; GO:0003723 RNA binding; GO:0005488 binding; GO:0003676 nucleic acid binding; GO:0005515 protein binding;	K14844	PUF6; pumilio homology domain family member 6		IPR011989; IPR012959; IPR016024; IPR033133;	Armadillo-like helical; CPL domain; Armadillo-type fold; Pumilio homology domain;	J	KOG2050	Puf family RNA-binding protein
Q9UP95	Solute carrier family 12 member 4 OS=Homo sapiens OX=9606 GN=SLC12A4 PE=1 SV=2	SLC12A4	120.65	6.7	0.67	0.00097638	plasma membrane	GO:0044700 single organism signaling; GO:0098661 inorganic anion transmembrane transport; GO:0016043 cellular component organization; GO:0065008 regulation of biological quality; GO:0034220 ion transmembrane transport; GO:0030001 metal ion transport; GO:0071804 cellular potassium ion transport; GO:0044699 single-organism process; GO:0006821 chloride transport; GO:0098656 anion transmembrane trans…	GO:0043229 intracellular organelle; GO:0016020 membrane; GO:0031226 intrinsic component of plasma membrane; GO:0098588 bounding membrane of organelle; GO:0031090 organelle membrane; GO:0071944 cell periphery; GO:0005737 cytoplasm; GO:0044446 intracellular organelle part; GO:0031224 intrinsic component of membrane; GO:0044424 intracellular part; GO:0005887 integral component of plasma membrane; GO…	GO:0015294 solute:cation symporter activity; GO:0022804 active transmembrane transporter activity; GO:0015291 secondary active transmembrane transporter activity; GO:0015075 ion transmembrane transporter activity; GO:0015379 potassium:chloride symporter activity; GO:0022853 active ion transmembrane transporter activity; GO:0015293 symporter activity; GO:0019901 protein kinase binding; GO:0022892 …	K14427	SLC12A4_5_6, KCC; solute carrier family 12 (potassium/chloride transporter), member 4/5/6		IPR004841; IPR018491;	Amino acid permease/ SLC12A domain; SLC12A transporter, C-terminal;	P	KOG2082	K+/Cl- cotransporter KCC1 and related transporters
P49643	DNA primase large subunit OS=Homo sapiens OX=9606 GN=PRIM2 PE=1 SV=2	PRIM2	58.805	1.6			nucleus	GO:0016043 cellular component organization; GO:0065008 regulation of biological quality; GO:0006260 DNA replication; GO:0006725 cellular aromatic compound metabolic process; GO:0006259 DNA metabolic process; GO:0044699 single-organism process; GO:0009058 biosynthetic process; GO:1903047 mitotic cell cycle process; GO:0044237 cellular metabolic process; GO:0060249 anatomical structure homeostasis;…	GO:0043229 intracellular organelle; GO:0055029 nuclear DNA-directed RNA polymerase complex; GO:0000428 DNA-directed RNA polymerase complex; GO:0061695 transferase complex, transferring phosphorus-containing groups; GO:0043232 intracellular non-membrane-bounded organelle; GO:0043601 nuclear replisome; GO:0044446 intracellular organelle part; GO:0030880 RNA polymerase complex; GO:0032991 macromolec…	GO:0003677 DNA binding; GO:0003896 DNA primase activity; GO:0034062 5'-3' RNA polymerase activity; GO:0097747 RNA polymerase activity; GO:0043167 ion binding; GO:0003697 single-stranded DNA binding; GO:0051539 4 iron, 4 sulfur cluster binding; GO:1901363 heterocyclic compound binding; GO:0097159 organic cyclic compound binding; GO:0016779 nucleotidyltransferase activity; GO:0003824 catalytic acti…	K02685	PRI2; DNA primase large subunit [EC:2.7.7.-]	hsa03030 DNA replication - Homo sapiens (human);
[truncated: 4,658 more rows]
